# Supplementary material for: Association between periodontitis and hypertension: cross-sectional survey from the Fourth National Oral Health Survey of China (2015–2016)
Source: PubMed Central journal article supplement — BMJ Open. 2023 Mar 27;13(3):e068724. doi: 10.1136/bmjopen-2022-068724 (PMC10069577; doi:10.1136/bmjopen-2022-068724), 2023-03-27
Supplement: bmjopen-2022-068724.draft_revisions.pdf [file bmjopen-2022-068724.draft_revisions.pdf]

# BMJ Open

BMJ Open is committed to open peer review. As part of this commitment we make the peer review history of every article we publish publicly available.

When an article is published we post the peer reviewers' comments and the authors' responses online. We also post the versions of the paper that were used during peer review. These are the versions that the peer review comments apply to.

The versions of the paper that follow are the versions that were submitted during the peer review process. They are not the versions of record or the final published versions. They should not be cited or distributed as the published version of this manuscript.

BMJ Open is an open access journal and the full, final, typeset and author-corrected version of record of the manuscript is available on our site with no access controls, subscription charges or pay-per-view fees (<http://bmjopen.bmj.com>).

If you have any questions on BMJ Open's open peer review process please email [info.bmjopen@bmj.com](mailto:info.bmjopen@bmj.com)

# BMJ Open

## Association Between Periodontitis and Hypertension: Cross-Sectional Survey from the Fourth National Oral Health Survey in China (2015-2016)

|                               |                                                                                                                                                                                                                                                                                                                                                                                                                                                                                                                                                                                                                                                                                                                                                                                                                                                                                                                                                                                                                                                                                                                                                                        |
|-------------------------------|------------------------------------------------------------------------------------------------------------------------------------------------------------------------------------------------------------------------------------------------------------------------------------------------------------------------------------------------------------------------------------------------------------------------------------------------------------------------------------------------------------------------------------------------------------------------------------------------------------------------------------------------------------------------------------------------------------------------------------------------------------------------------------------------------------------------------------------------------------------------------------------------------------------------------------------------------------------------------------------------------------------------------------------------------------------------------------------------------------------------------------------------------------------------|
| Journal:                      | <i>BMJ Open</i>                                                                                                                                                                                                                                                                                                                                                                                                                                                                                                                                                                                                                                                                                                                                                                                                                                                                                                                                                                                                                                                                                                                                                        |
| Manuscript ID                 | bmjopen-2022-068724                                                                                                                                                                                                                                                                                                                                                                                                                                                                                                                                                                                                                                                                                                                                                                                                                                                                                                                                                                                                                                                                                                                                                    |
| Article Type:                 | Original research                                                                                                                                                                                                                                                                                                                                                                                                                                                                                                                                                                                                                                                                                                                                                                                                                                                                                                                                                                                                                                                                                                                                                      |
| Date Submitted by the Author: | 02-Oct-2022                                                                                                                                                                                                                                                                                                                                                                                                                                                                                                                                                                                                                                                                                                                                                                                                                                                                                                                                                                                                                                                                                                                                                            |
| Complete List of Authors:     | Zhan, Yalin; Peking University Hospital of Stomatology, First Clinical Division<br>Jiao, Jian; Peking University Hospital of Stomatology, Department of Periodontology<br>Jing, Wu-di; Peking University Hospital of Stomatology<br>Feng, Xiping; Shanghai Jiao Tong University School of Medicine Affiliated Ninth People's Hospital, Department of Preventive Dentistry<br>Tai, Baojun; Wuhan University, School & Hospital of Stomatology<br>Hu, Deyu; Sichuan University, West China School of Stomatology<br>Lin, Huan-cai; Sun Yat-Sen University, Guanghua School of Stomatology, Hospital of Stomatology<br>Wang, Bo; Peking University Hospital of Stomatology<br>Wang, Chunxiao; Chinese Center for Disease Control and Prevention<br>Zheng, Shuguo; Peking University Hospital of Stomatology<br>Liu, Xuenan; Peking University Hospital of Stomatology<br>Rong, Wensheng; Peking University Hospital of Stomatology<br>Wang, Weijian; Peking University Hospital of Stomatology<br>Wang, Xing; Peking University Hospital of Stomatology<br>Si, Yan; Peking University Hospital of Stomatology<br>Meng, Huanxin; Peking University Hospital of Stomatology |
| Keywords:                     | Hypertension < CARDIOLOGY, ORAL MEDICINE, Epidemiology < TROPICAL MEDICINE, Public health < INFECTIOUS DISEASES                                                                                                                                                                                                                                                                                                                                                                                                                                                                                                                                                                                                                                                                                                                                                                                                                                                                                                                                                                                                                                                        |
|                               |                                                                                                                                                                                                                                                                                                                                                                                                                                                                                                                                                                                                                                                                                                                                                                                                                                                                                                                                                                                                                                                                                                                                                                        |

SCHOLARONE™  
Manuscripts

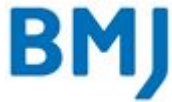

I, the Submitting Author has the right to grant and does grant on behalf of all authors of the Work (as defined in the below author licence), an exclusive licence and/or a non-exclusive licence for contributions from authors who are: i) UK Crown employees; ii) where BMJ has agreed a CC-BY licence shall apply, and/or iii) in accordance with the terms applicable for US Federal Government officers or employees acting as part of their official duties; on a worldwide, perpetual, irrevocable, royalty-free basis to BMJ Publishing Group Ltd ("BMJ") its licensees and where the relevant Journal is co-owned by BMJ to the co-owners of the Journal, to publish the Work in this journal and any other BMJ products and to exploit all rights, as set out in our [licence](#).

The Submitting Author accepts and understands that any supply made under these terms is made by BMJ to the Submitting Author unless you are acting as an employee on behalf of your employer or a postgraduate student of an affiliated institution which is paying any applicable article publishing charge ("APC") for Open Access articles. Where the Submitting Author wishes to make the Work available on an Open Access basis (and intends to pay the relevant APC), the terms of reuse of such Open Access shall be governed by a Creative Commons licence – details of these licences and which [Creative Commons](#) licence will apply to this Work are set out in our licence referred to above.

Other than as permitted in any relevant BMJ Author's Self Archiving Policies, I confirm this Work has not been accepted for publication elsewhere, is not being considered for publication elsewhere and does not duplicate material already published. I confirm all authors consent to publication of this Work and authorise the granting of this licence.

1  
2  
3  
4  
5 **Association Between Periodontitis and Hypertension: Cross-Sectional Survey**

6  
7 **from** the Fourth National Oral Health Survey in China (2015-2016)

8  
9  
10 **Running title: Association between** periodontitis and hypertension

11  
12  
13  
14  
15 Ya-lin Zhan<sup>1\*</sup>, PhD, Jian Jiao<sup>1\*</sup>, DDS, Wu-di Jing<sup>1</sup>, DDS., Xi-ping Feng<sup>2</sup>, PhD, Bao-jun  
16  
17 Tai<sup>3</sup>, PhD, De-yu Hu<sup>4</sup>, PhD, Huan-cai Lin<sup>5</sup>, PhD, Bo Wang<sup>6</sup>, EMBA, Chun-xiao Wang<sup>7</sup>,  
18  
19 PhD, Shu-guo Zheng<sup>8</sup>, PhD, Xue-nan Liu<sup>8</sup>, PhD, Wen-sheng Rong<sup>8</sup>, PhD, Wei-jian  
20  
21 Wang<sup>8</sup>, PhD, Xing Wang<sup>6</sup>, PhD, Yan Si<sup>8</sup>, PhD, Huan-xin Meng<sup>1</sup>, PhD,<sup>†</sup>

22  
23  
24  
25  
26  
27  
28 <sup>1</sup> Department of Periodontology, Peking University School and Hospital of  
29  
30 Stomatology, National Engineering Laboratory for Digital and Material Technology of  
31  
32 Stomatology, Beijing Key Laboratory of Digital Stomatology, Beijing, P.R. China

33  
34  
35  
36 <sup>2</sup> Shanghai Ninth People's Hospital, Shanghai Jiao Tong University School of Medicine,  
37  
38 Shanghai, P.R. China.

39  
40  
41 <sup>3</sup> School & Hospital of Stomatology, Wuhan University, Wuhan, P.R. China.

42  
43  
44 <sup>4</sup> West China School of Stomatology, Sichuan University, Chengdu, P.R. China.

45  
46  
47 <sup>5</sup> Guanghua School of Stomatology, Hospital of Stomatology, Sun Yat-sen University,  
48  
49 Guangzhou, P.R. China.

50  
51  
52 <sup>6</sup> Chinese Stomatological Association, Beijing, P.R. China.

53  
54  
55 <sup>7</sup> Chinese Center for Disease Control and Prevention, Beijing, P.R. China.

56  
57  
58 <sup>8</sup> Department of Preventive Dentistry, Peking University School and Hospital of  
59  
60 Stomatology, National Engineering Laboratory for Digital and Material Technology of

1  
2  
3  
4 Stomatology, Beijing Key Laboratory of Digital Stomatology, Beijing, P.R. China  
5  
6  
7  
8

9 \*The two authors contributed equally to this work.

10  
11 † corresponding author  
12  
13  
14  
15  
16

17 **Corresponding author:** Huanxin Meng

18  
19 Department of Periodontology, Peking University School and Hospital of Stomatology,  
20  
21 National Engineering Laboratory for Digital and Material Technology of Stomatology,  
22  
23 Beijing Key Laboratory of Digital Stomatology Zhongguancun Nandajie 22, Haidian  
24  
25 District, 100081, Beijing, P.R.China  
26  
27  
28

29  
30 Email: [kqhxmeng@126.com](mailto:kqhxmeng@126.com)  
31

32  
33 Tel: +86-010-82195522; Fax: +86-010-82195522.  
34  
35  
36  
37

## 38 **ABSTRACT**

39  
40 **Objectives** To evaluate the association between periodontitis severity and hypertension  
41  
42 based on Chinese epidemiological data.  
43  
44

45  
46 **Design** This cross-sectional survey enrolled adults from the Fourth National Oral  
47  
48 Health Survey of China (2015-2016).  
49

50  
51 **Setting** The study data were obtained from the Fourth National Oral Health Survey of  
52  
53 China (2015-2016).  
54

55  
56 **Participants** The study included dentate individuals aged 35-44 years (n = 4,409),  
57  
58 55-64 years (n = 4,568), and 65-74 years (n = 4,218).  
59  
60

1  
2  
3  
4 **Primary and secondary outcome measures** Periodontal status, defined on the basis  
5  
6 of the 2018 classification scheme, and periodontal parameters (e.g., bleeding on  
7  
8 probing [BOP], probing depth [PD], and attachment loss [AL]) were compared between  
9  
10 hypertensive and normotensive individuals. Smoothed scatterplots were constructed to  
11  
12 demonstrate the associations of periodontal parameters and periodontal status with  
13  
14 hypertension.  
15  
16  
17  
18

19 **Results** Severe periodontitis (stages III and IV) was present in 41.34% and 27.99% of  
20  
21 hypertensive and normotensive individuals, respectively ( $p < 0.001$ ). The prevalence of  
22  
23 severe periodontitis was higher in hypertensive individuals than that in normotensive  
24  
25 individuals among participants aged 35-44 years (18.12% and 10.09%,  $p < 0.001$ ) and  
26  
27 55-64 years (40.12% and 36.77%,  $p = 0.035$ ), but not in participants aged 65-74 years  
28  
29 (46.40% and 45.14%,  $p = 0.429$ ). Therefore, the difference in periodontal status  
30  
31 between hypertensive and normotensive individuals decreased with age. There were  
32  
33 higher prevalences of BOP,  $PD \geq 4$  mm, and  $PD \geq 6$  mm in hypertensive individuals  
34  
35 than in normotensive individuals (57.71% vs 53.12%, 22.11% vs 16.29%, and 2.07%  
36  
37 vs 1.22%, respectively). Periodontitis severity and the proportion of teeth with  $PD \geq$   
38  
39 4 or  $\geq 6$  mm were positively associated with hypertension.  
40  
41  
42  
43  
44  
45  
46  
47

48 **Conclusion** Based on the data of the Fourth National Oral Health Survey of China,  
49  
50 hypertensive individuals were more likely than normotensive individuals to have  
51  
52 periodontitis. Periodontal severity is associated with hypertension.  
53  
54

55 **Key Words:** Hypertension, oral medicine, epidemiology, public health.  
56  
57  
58  
59  
60

### Strengths and limitations of this study

The study included data from a large-scale national survey in which participants were representative of the Chinese population. The periodontitis classification proposed at the 2017 World Workshop was used to determine the association between periodontitis and hypertension. Hypertension was self-reported and blood pressure was not measured.

### INTRODUCTION

Hypertension, which affects 45% of the global population, is the most common cardiovascular disease (CVDs) worldwide <sup>1,2</sup>. It is defined as systolic or diastolic blood pressure (BP) of  $\geq 140$  or  $\geq 90$  mmHg, respectively. Hypertension is frequently poorly controlled and untreated <sup>3</sup>. It is a complex disease with multiple causes and a major risk factor for CVDs <sup>4</sup>. Oxidative stress, endothelial dysfunction, and inflammation are associated with the development of hypertension <sup>5</sup>. The results of experimental and clinical studies suggest that inflammation has a major role in the development of hypertension <sup>6</sup>. Chronic inflammation predisposes to the development of pro-hypertensive inflammation.

Periodontal disease, an immune-inflammatory reaction to plaque biofilms <sup>7</sup>, has received substantial attention because of its association with CVDs. The Global Burden of Disease Study revealed that periodontitis was the sixth most prevalent disease worldwide. Periodontitis affects 743 million people worldwide (11.2% of the global population); the prevalence is higher in China than in other countries. The Fourth National Oral Health Survey of China showed that 90.9% individuals aged 35-44 years

1  
2  
3  
4 had periodontal disease <sup>8,9</sup>. The low-grade inflammation associated with periodontitis  
5  
6 has harmful effects on the endothelial function, which may result in hypertension <sup>10</sup>. A  
7  
8 recent study revealed that individuals with periodontitis have increased risks of  
9  
10 hypertension and antihypertensive treatment failure <sup>11,12</sup>. Previous studies have  
11  
12 suggested that dental treatment can improve blood pressure, although the findings have  
13  
14 been inconclusive and further studies are needed <sup>13-16</sup>.  
15  
16  
17

18  
19 Periodontitis and hypertension are major health problems, and their association  
20  
21 received considerable public health attention. Therefore, we evaluated the relationship  
22  
23 between periodontitis and hypertension based on the data from the Fourth National Oral  
24  
25 Health Survey of China. We sought to determine whether individuals with periodontitis  
26  
27 are more likely to have hypertension compared with individuals who do not have  
28  
29 periodontitis; we also sought to determine whether periodontitis severity is associated  
30  
31 with hypertension.  
32  
33  
34  
35  
36  
37  
38  
39

## 40 **MATERIALS AND METHODS**

### 41 *Study design and sample*

42  
43  
44 This cross-sectional study obtained data from adult participants of the Fourth National  
45  
46 Oral Health Survey of China (2015-2016) <sup>8</sup>. The planned sample size was 4,230 each  
47  
48 for the age groups 35-44, 55-64 and 65-74 years. We excluded data from edentulous  
49  
50 participants and from participants without complete information. Finally, 13,195  
51  
52 individuals were included (4,409, 4,568, and 4,218 individuals aged 35-44, 55-64, and  
53  
54 65-74 years, respectively).  
55  
56  
57  
58  
59  
60



### ***Ethics approval***

The study protocol was approved by the Ethics Committee of the Chinese Stomatological Association (approval no.: 2014-003). Written informed consent was obtained from all participants. This study was performed in accordance with the 2013 revision of the Declaration of Helsinki.

### ***Data collection***

We collected data related to oral examination findings and questionnaire answers.

#### ***1. Periodontal examination***

Periodontal examinations were performed using a community periodontal index probe.

A full-mouth examination was performed, during which the probe was walked along the gingival crevices using a force of  $\leq 20$  g to assess bleeding on probing (BOP), the presence of calculus, probing depth (PD), and attachment loss (AL). For each parameter, each tooth was scored according to the condition of the most severely affected site.

Training programs were conducted for examiner calibration before the survey. The reliability of the results was assessed using kappa values; kappa values for periodontal pocket depth were  $\geq 0.6$ . Additionally, 5% of the participants were randomly selected for assessment of inter-examiner reproducibility. The kappa values for all age-groups were 0.76-0.80.

### ***Patient and public involvement***

1  
2  
3  
4 The study participants or the public were not involved in the design, or conduct, or  
5  
6 reporting, or dissemination plans of our research.  
7  
8  
9

### 10 11 ***Study parameters*** 12

13  
14 Supragingival and subgingival calculus were identified by visual examination and  
15  
16 probing, respectively (0 = absent, 1 = present, 9 = tooth excluded, and X = tooth not  
17  
18 present). PD was recorded as 0 (1–3 mm), 1 (4–5 mm), 2 ( $\geq 6$  mm), 9 (tooth excluded),  
19  
20 or X (tooth not present). BOP was recorded as 0 (absent), 1 (present), 9 (tooth  
21  
22 excluded), or X (tooth not present). AL was measured as the distance from the  
23  
24 cementoenamel junction to the bottom of the periodontal pocket; it was recorded as  
25  
26 0 (0–3 mm), 1 (4–5 mm), 2 (6–8 mm), 3 (9–11 mm), 4 ( $\geq 12$  mm), 9 (tooth excluded),  
27  
28 or X (tooth not present).  
29  
30  
31  
32  
33  
34

35 The classification scheme proposed at the 2017 World Workshop on the Classification  
36  
37 of Periodontal and Per-Implant Diseases and Conditions was used to classify the  
38  
39 periodontal status as periodontally healthy ( $< 10\%$  BOP-positive sites and  $PD \leq 3$  mm)  
40  
41 or gingivitis ( $\geq 10\%$  BOP-positive sites and  $PD \leq 3$  mm). Periodontitis was staged  
42  
43 using the algorithm developed by Graetz *et al* <sup>17</sup>. For each tooth, stages I-III  
44  
45 periodontitis were defined as AL of 1–2 mm, 3–4 mm, and  $\geq 5$  mm, respectively. We  
46  
47 also considered the number of teeth lost when classifying periodontitis: stages I and II,  
48  
49 no tooth loss; stage III,  $\leq 4$  teeth lost; and stage IV,  $\geq 5$  teeth lost. The cause of tooth  
50  
51 loss was not considered. Finally, we evaluated the complexity of patient management.  
52  
53  
54  
55  
56  
57  
58  
59 Stage II patients were reclassified as stage III if the maximum PD was  $\geq 6$  mm. Stage  
60

1  
2  
3  
4 III patients were reclassified as stage IV if there were < 10 opposing pairs of teeth).  
5  
6  
7  
8

9  
10 *2. Interview data from the questionnaire*

11 Questionnaires were administered during in-person interviews to collect data regarding  
12 demographics, socioeconomic status, habits, dental history, and health attitudes. The  
13 following information was collected for analysis: age (years), annual family income (in  
14 increments of 10,000 yuan), sex (male or female), duration of education (years), self-  
15 reported hypertension (yes or no), smoking status (current smoker, former smoker, or  
16 non-smoker), and region (urban or rural).  
17  
18  
19  
20  
21  
22  
23  
24  
25  
26  
27  
28  
29

30 *Statistical analyses*

31  
32 Statistical analyses were performed using SPSS (version 19; IBM Corp., Armonk, NY,  
33 USA) or R (version 3.6.1; R Foundation for Statistical Computing, Vienna, Austria).  
34  
35 The primary outcome was periodontal status (healthy, gingivitis, and stages I-IV  
36 periodontitis). The secondary outcomes were the proportions of BOP-positive teeth,  
37 teeth with PD  $\geq 4$  and  $\geq 6$  mm, teeth with AL  $\geq 4$ ,  $\geq 6$ , and  $\geq 9$  mm; and missing  
38 teeth. First, descriptive analysis was performed. Quantitative data were reported as  
39 means and standard deviations; categorical data were reported as numbers and  
40 percentages. Periodontal parameters were compared between hypertensive and  
41 normotensive individuals; subgroup analyses were conducted according to age group  
42 and smoking status. Periodontal status and parameters were analysed using the chi-  
43 square test. Additionally, smoothed scatterplots based on generalised additive models  
44  
45  
46  
47  
48  
49  
50  
51  
52  
53  
54  
55  
56  
57  
58  
59  
60

1  
2  
3  
4 were constructed, with adjustment for confounders (sex, smoking status, region,  
5  
6 duration of education, and annual family income), to evaluate the relationships of  
7  
8 hypertension prevalence with periodontal status or parameters. The level of statistical  
9  
10 significance was set at  $p < 0.05$ .  
11  
12  
13  
14  
15  
16

## 17 RESULTS

18  
19 The participants were randomly selected from 31 provinces, autonomous regions, and  
20  
21 municipalities in mainland China. In total, data from 13,195 individuals were included  
22  
23 in the analysis; invalid data from five participants and data from 264 edentulous patients  
24  
25 were excluded. The mean individual age was  $56.43 \pm 12.40$  years. The sample  
26  
27 consisted of 6,575 men (49.83%) and 6,620 women (50.17%). There were 3,470 non-  
28  
29 smokers (26.30%), 8,405 current smokers (63.71%), and 1,318 former smokers  
30  
31 (9.99%). Hypertension was present and absent in 3,154 (23.90%) and 10,041 (76.10%)  
32  
33 participants, respectively.  
34  
35  
36  
37  
38  
39  
40  
41  
42

### 43 *Differences in periodontal status between hypertensive and normotensive* 44 *participants decreased with age*

45  
46  
47 Table 1 and S1 present the distributions of periodontal status according to age in  
48  
49 participants with and without hypertension.  
50  
51

52  
53 Significantly greater proportions of hypertensive participants had stages I-IV  
54  
55 periodontitis (70.23% vs. 61.51%,  $p < 0.001$ ) and severe periodontitis (stages III-IV,  
56  
57 41.34% vs. 27.99%,  $p < 0.001$ ), compared with normotensive participants. Stratified  
58  
59  
60

analysis according to age showed that the prevalence of periodontitis (stage I-IV) was significantly greater in hypertensive participants than in normotensive participants among individuals aged 35-44 years (52.33% vs. 59.06%,  $p = 0.030$ ), 55-64 years (72.61% vs. 69.19%,  $p = 0.023$ ), and 65-74 years (70.23% vs. 66.35%,  $p = 0.009$ ). Severe periodontitis (stage III and stage IV) was more common in hypertensive participants than in normotensive participants among individuals aged 35-44 years (18.12% vs. 10.09%,  $p < 0.001$ ) and 55-64 years (40.12% vs. 36.77%,  $p = 0.035$ ), but not among individuals aged 65-74 years (46.40% vs. 45.14%,  $p = 0.429$ ). Therefore, differences in periodontal status between hypertensive and normotensive participants decreased with age (Table 1).

Table 1. Comparison of distribution of periodontal status according to the 2018 classification by age groups between hypertensive and normotensive subjects.

|             |            | NT   |      |           | HT  |      |           |
|-------------|------------|------|------|-----------|-----|------|-----------|
|             |            | N    | %    | 95% CI    | N   | %    | 95% CI    |
| 35-45 years | Health     | 658  | 15.9 | 14.8~17.1 | 40  | 14.5 | 10.7~19.0 |
|             | Gingivitis | 1312 | 31.7 | 30.3~33.2 | 73  | 26.4 | 21.5~31.9 |
|             | Stage I    | 1134 | 27.4 | 26.1~28.8 | 69  | 25.0 | 20.2~30.4 |
|             | Stage II   | 612  | 14.8 | 13.7~15.9 | 44  | 15.9 | 12.0~20.6 |
|             | Stage III  | 360  | 8.7  | 7.9~9.6   | 40  | 14.5 | 10.7~19.0 |
|             | Stage IV   | 57   | 1.4  | 1.1~1.8   | 10  | 3.6  | 1.9~6.3   |
| 55-65 years | Health     | 347  | 10.6 | 9.6~11.7  | 116 | 9.0  | 7.5~10.6  |
|             | Gingivitis | 661  | 20.2 | 18.9~21.6 | 239 | 18.4 | 16.4~20.6 |
|             | Stage I    | 403  | 12.3 | 11.2~13.5 | 174 | 13.4 | 11.7~15.4 |
|             | Stage II   | 658  | 20.1 | 18.8~21.5 | 247 | 19.1 | 17.0~21.3 |
|             | Stage III  | 659  | 20.1 | 18.8~21.5 | 273 | 21.1 | 18.9~23.3 |
|             | Stage IV   | 544  | 16.6 | 15.4~17.9 | 247 | 19.1 | 17.0~21.3 |
| 65-75 years | Health     | 348  | 13.2 | 12.0~14.5 | 182 | 11.5 | 10.0~13.1 |

|       |            |      |      |           |     |      |           |
|-------|------------|------|------|-----------|-----|------|-----------|
|       | Gingivitis | 539  | 20.4 | 18.9~22.0 | 289 | 18.3 | 16.4~20.2 |
|       | Stage I    | 175  | 6.6  | 5.7~7.6   | 126 | 8.0  | 6.7~9.4   |
|       | Stage II   | 384  | 14.6 | 13.3~16.0 | 251 | 15.9 | 14.1~17.7 |
|       | Stage III  | 475  | 18.0 | 16.6~19.5 | 304 | 19.2 | 17.3~21.2 |
|       | Stage IV   | 715  | 27.1 | 25.5~28.8 | 430 | 27.2 | 25.0~29.4 |
| Total | Health     | 1353 | 13.5 | 12.8~14.2 | 338 | 10.7 | 9.7~11.8  |
|       | Gingivitis | 2512 | 25.0 | 24.2~25.9 | 601 | 19.1 | 17.7~20.5 |
|       | Stage I    | 1712 | 17.1 | 16.3~17.8 | 369 | 11.7 | 10.6~12.9 |
|       | Stage II   | 1654 | 16.5 | 15.8~17.2 | 542 | 17.2 | 15.9~18.5 |
|       | Stage III  | 1494 | 14.9 | 14.2~15.6 | 617 | 19.6 | 18.2~21.0 |
|       | Stage IV   | 1316 | 13.1 | 12.5~13.8 | 687 | 21.8 | 20.4~23.2 |

HT = Hypertension; NT = Normotension.

Table S1 showed the distribution of periodontal status stratified according to smoking status. Periodontitis (stage I-IV) was more common in hypertensive participants than in normotensive participants among current smokers (76.16% vs. 68.15%,  $p < 0.001$ ) and non-smokers (67.25% vs. 57.41%,  $p < 0.001$ ), but not among former smokers (73.59% vs. 70.58%,  $p = 0.270$ ). Severe periodontitis (stage III and stage IV) was significantly more common in hypertensive participants than in normotensive participants among non-smokers (48.45% vs. 34.67%,  $p < 0.001$ ), current smokers (36.82% vs. 23.75%,  $p < 0.001$ ), and former smokers (50.26% vs 37.93%,  $p < 0.001$ ).

***Periodontal status was significantly worse in hypertensive participants than in normotensive participants***

Tables 2 and 3 present comparisons of periodontal parameters between hypertensive and normotensive participants. Compared with normotensive participants, hypertensive participants had significantly greater proportions of teeth with BOP (57.71% vs. 53.12%), PD  $\geq$  4 mm (22.11% vs. 16.29%), PD  $\geq$  6 mm (2.07% vs. 1.22%), AL  $\geq$

4 mm (28.86% vs. 20.56%), AL  $\geq$  6 mm (8.44% vs. 5.54%), and AL  $\geq$  9 mm (1.72% vs. 1.18%). Differences in periodontal parameters between hypertensive and normotensive participants decreased with age. The differences in periodontal parameters between hypertensive and normotensive participants were similar among current smokers, former smokers, and non-smokers. Difference in the mean prevalence of periodontal pocket (PD  $\geq$  4 mm) were consistent in the stratified analysis. Compared with normotensive participants, hypertensive participants had significantly greater proportions of teeth with PD  $\geq$  4 mm (4.45 vs. 3.46), PD  $\geq$  6 mm (0.37 vs. 0.22), AL  $\geq$  4 mm (1.18 vs. 0.81), and AL  $\geq$  6 mm (0.2 vs. 0.12). The mean number of BOP-positive teeth did not significant differ between hypertensive and normotensive participants (12.43 vs. 12.33). The mean number of teeth showed a distribution pattern similar to the distribution patterns of various periodontal parameters. The difference in the mean number of teeth between hypertensive and normotensive participants decreased with age. Furthermore, differences in the prevalences of teeth with PD  $\geq$  4 mm and deep PD sites were consistent in the stratified analysis.

Table 2. Comparison of percentage of teeth affected by age groups and smoking status.

|             |               | NT   |              | HT    |             |       |
|-------------|---------------|------|--------------|-------|-------------|-------|
|             | PTA           | Mean | 95% CI       | Mean  | 95% CI      | p*    |
| 35-45 years | BOP+          | 46.5 | 45.41~47.55. | 50.32 | 45.92~54.72 | 0.096 |
|             | PD $\geq$ 4mm | 10.5 | 9.90~11.05   | 15.83 | 12.86~18.80 | 0.001 |
|             | PD $\geq$ 6mm | 0.5  | 0.40~0.59    | 1.09  | 0.56~1.63   | 0.031 |
|             | AL $\geq$ 4mm | 6    | 5.55~6.41    | 10.14 | 7.85~12.43  | 0.001 |
|             | AL $\geq$ 6mm | 0.8  | 0.69~0.95    | 1.62  | 0.82~2.42   | 0.052 |
| 55-65 years | BOP+          | 52.5 | 51.30~53.72  | 54.03 | 52.11~55.96 | 0.188 |
|             | PD $\geq$ 4mm | 17.9 | 17.11~18.76  | 20.3  | 18.92~21.68 | 0.004 |

|  |                |               |      |             |       |             |       |
|--|----------------|---------------|------|-------------|-------|-------------|-------|
|  |                | PD $\geq$ 6mm | 1.4  | 1.21~1.65   | 1.9   | 1.55~2.24   | 0.024 |
|  |                | AL $\geq$ 4mm | 22.1 | 21.16~22.95 | 21.53 | 20.15~22.92 | 0.543 |
|  |                | AL $\geq$ 6mm | 5.3  | 4.90~5.78   | 5.49  | 4.79~6.18   | 0.722 |
|  | 65-75 years    | BOP+          | 49.3 | 47.91~50.59 | 50.84 | 49.09~52.58 | 0.157 |
|  |                | PD $\geq$ 4mm | 17.4 | 16.45~18.28 | 19.6  | 18.39~20.81 | 0.004 |
|  |                | PD $\geq$ 6mm | 1.5  | 1.29~1.81   | 1.84  | 1.49~2.19   | 0.185 |
|  |                | AL $\geq$ 4mm | 28.7 | 27.59~29.78 | 27.62 | 26.25~28.99 | 0.240 |
|  |                | AL $\geq$ 6mm | 8.9  | 8.28~9.61   | 8.29  | 7.47~9.11   | 0.226 |
|  | Current smoker | BOP+          | 49.6 | 46.77~52.42 | 49.89 | 45.99~53.79 | 0.311 |
|  |                | PD $\geq$ 4mm | 21.4 | 19.36~23.52 | 22.94 | 20.16~25.72 | 0.000 |
|  |                | PD $\geq$ 6mm | 2.2  | 1.53~2.80   | 2.09  | 1.34~2.84   | 0.006 |
|  |                | AL $\geq$ 4mm | 36.3 | 33.86~38.78 | 33.54 | 30.24~36.84 | 0.000 |
|  |                | AL $\geq$ 6mm | 13.1 | 11.38~14.75 | 11.38 | 9.26~13.50  | 0.001 |
|  | Non-smoker     | BOP+          | 48.9 | 47.22~50.57 | 51.56 | 49.42~53.69 | 0.000 |
|  |                | PD $\geq$ 4mm | 15.4 | 14.30~16.47 | 17.91 | 16.49~19.33 | 0.000 |
|  |                | PD $\geq$ 6mm | 1.1  | 0.89~1.40   | 1.66  | 1.27~2.05   | 0.000 |
|  |                | AL $\geq$ 4mm | 25.1 | 23.79~26.41 | 24.67 | 23.10~26.23 | 0.000 |
|  |                | AL $\geq$ 6mm | 7.2  | 6.44~7.92   | 6.60  | 5.71~7.50   | 0.000 |
|  | Former smoker  | BOP+          | 50.2 | 46.54~53.82 | 48.84 | 44.03~53.65 | 0.603 |
|  |                | PD $\geq$ 4mm | 18.7 | 16.23~21.21 | 22.62 | 18.90~26.34 | 0.000 |
|  |                | PD $\geq$ 6mm | 2.2  | 1.32~3.13   | 2.31  | 1.07~3.56   | 0.126 |
|  |                | AL $\geq$ 4mm | 30.7 | 27.81~33.60 | 32.77 | 28.63~36.92 | 0.001 |
|  |                | AL $\geq$ 6mm | 9.3  | 7.63~10.97  | 11.66 | 9.01~14.30  | 0.002 |
|  | Total          | BOP+          | 0.0  | 0.00~0.00   | 0.00  | 0.00~0.00   | 0.000 |
|  |                | PD $\geq$ 4mm | 0.0  | 0.00~0.00   | 0.00  | 0.00~0.00   | 0.000 |
|  |                | PD $\geq$ 6mm | 0.0  | 0.00~0.00   | 0.00  | 0.00~0.00   | 0.000 |
|  |                | AL $\geq$ 4mm | 0.0  | 0.00~0.00   | 0.00  | 0.00~0.00   | 0.000 |
|  |                | AL $\geq$ 6mm | 0.0  | 0.00~0.00   | 0.00  | 0.00~0.00   | 0.001 |

AL= attachment loss; BOP = bleeding on probing; HT = Hypertension;

NT = Normotension; PD = probing depth; PTA = Percentage of teeth affected;

\* significant difference by Student's t test.

Table 3. Number of percentage of teeth affected by age groups and smoking status.



|                |         | NT    |             | HT    |             |       |
|----------------|---------|-------|-------------|-------|-------------|-------|
|                | NTA     | Mean  | 95% CI      | Mean  | 95% CI      | p*    |
| 35-45 years    | BOP+    | 12.69 | 12.40~12.99 | 13.61 | 12.42~14.80 | 0.143 |
|                | PD≥ 4mm | 2.83  | 2.68~2.99   | 4.19  | 3.40~4.98   | 0.001 |
|                | PD≥ 6mm | 0.13  | 0.10~0.15   | 0.27  | 0.14~0.40   | 0.036 |
|                | AL≥ 4mm | 1.58  | 1.47~1.70   | 2.58  | 2.00~3.16   | 0.001 |
|                | AL≥ 6mm | 0.20  | 0.17~0.24   | 0.38  | 0.21~0.55   | 0.049 |
| 55-65 years    | BOP+    | 13.01 | 12.69~13.33 | 13.37 | 12.86~13.88 | 0.241 |
|                | PD≥ 4mm | 4.21  | 4.02~4.40   | 4.76  | 4.43~5.08   | 0.005 |
|                | PD≥ 6mm | 0.28  | 0.24~0.32   | 0.41  | 0.34~0.49   | 0.003 |
|                | AL≥ 4mm | 5.03  | 4.82~5.23   | 4.80  | 4.49~5.11   | 0.222 |
|                | AL≥ 6mm | 1.07  | 0.99~1.15   | 1.08  | 0.95~1.21   | 0.914 |
| 65-75 years    | BOP+    | 10.92 | 10.59~11.26 | 11.47 | 11.03~11.91 | 0.051 |
|                | PD≥ 4mm | 3.52  | 3.33~3.72   | 4.25  | 3.98~4.52   | 0.000 |
|                | PD≥ 6mm | 0.27  | 0.23~0.31   | 0.36  | 0.29~0.42   | 0.042 |
|                | AL≥ 4mm | 5.65  | 5.43~5.88   | 5.60  | 5.31~5.88   | 0.752 |
|                | AL≥ 6mm | 1.46  | 1.36~1.56   | 1.40  | 1.27~1.53   | 0.508 |
| Current smoker | BOP+    | 12.30 | 11.93~12.67 | 12.09 | 0.33~0.42   | 0.583 |
|                | PD≥ 4mm | 4.59  | 4.36~4.82   | 5.49  | 594.42~0.00 | 0.001 |
|                | PD≥ 6mm | 0.31  | 0.27~0.35   | 0.50  | 61.18~0.00  | 0.001 |
|                | AL≥ 4mm | 4.86  | 4.62~5.09   | 6.13  | 658.63~0.00 | 0.000 |
|                | AL≥ 6mm | 1.19  | 1.09~1.29   | 1.59  | 179.14~0.00 | 0.001 |
| Non-smoker     | BOP+    | 12.29 | 12.06~12.51 | 12.62 | 12.22~13.02 | 0.159 |
|                | PD≥ 4mm | 2.89  | 2.78~3.01   | 3.91  | 3.68~4.15   | 0.000 |
|                | PD≥ 6mm | 0.16  | 0.14~0.18   | 0.29  | 0.24~0.34   | 0.000 |
|                | AL≥ 4mm | 3.10  | 2.98~3.22   | 4.38  | 4.15~4.61   | 0.000 |
|                | AL≥ 6mm | 0.60  | 0.56~0.64   | 0.92  | 0.83~1.01   | 0.000 |
| Former smoker  | BOP+    | 12.72 | 12.13~13.32 | 12.21 | 11.28~13.14 | 0.359 |
|                | PD≥ 4mm | 4.12  | 3.76~4.48   | 5.14  | 4.50~5.78   | 0.006 |
|                | PD≥ 6mm | 0.36  | 0.27~0.44   | 0.53  | 0.37~0.69   | 0.069 |
|                | AL≥ 4mm | 5.29  | 4.90~5.68   | 5.94  | 5.32~6.55   | 0.081 |
|                | AL≥ 6mm | 1.18  | 1.02~1.33   | 1.66  | 1.36~1.96   | 0.005 |
| Total          | BOP+    | 12.33 | 12.15~12.51 | 12.44 | 12.42~14.80 | 0.574 |
|                | PD≥ 4mm | 3.46  | 3.36~3.57   | 4.45  | 3.40~4.98   | 0.000 |
|                | PD≥ 6mm | 0.22  | 0.20~0.24   | 0.37  | 0.14~0.40   | 0.000 |
|                | AL≥ 4mm | 3.77  | 3.67~3.88   | 5.00  | 2.00~3.16   | 0.000 |
|                |         |       |             |       |             |       |

|               |      |           |      |           |       |
|---------------|------|-----------|------|-----------|-------|
| AL $\geq$ 6mm | 0.81 | 0.77~0.85 | 1.18 | 0.21~0.55 | 0.000 |
|---------------|------|-----------|------|-----------|-------|

AL= attachment loss; BOP = bleeding on probing; HT = Hypertension;

NT = Normotension; NTA = Number of teeth affected; PD = probing depth;

\* significant difference by Student's t test.

### ***Hypertension prevalence increased with periodontitis severity***

Multivariate regression analysis was performed to evaluate the relationship between hypertension and age stratified according to periodontal status, after adjustments for sex, smoking status, region, duration of education, and annual family income (Table 4).

Compared with participants who did not have periodontitis, participants with stages III and IV periodontitis had a significant greater risk of hypertension (odds ratio [OR] = 1.698, 95% confidence interval [CI] = 1.45-1.99,  $p < 0.000$ ). However, the difference between participants with stages I and II periodontitis and participants without periodontitis was not statistically significant (OR = 1.028, 95% CI = 0.88-1.20,  $p = 0.717$ ). Therefore, hypertension prevalence increased with periodontitis severity.

Notably, the OR for participants with stages III and IV periodontitis decreased with age; it was not statistically significant in participants aged 65-74 years (Table 4).

Table 4. Relationships between hypertension and periodontal status (compared with non-periodontitis) according to the 2018 classification analyzed by logistic regressions with adjustment for gender, smoking status, region, years of education, and annual family income

| Age group | Periodontal status | OR | 95% CI | p |
|-----------|--------------------|----|--------|---|
|-----------|--------------------|----|--------|---|

|             |                                             |       |           |       |
|-------------|---------------------------------------------|-------|-----------|-------|
| 35-45 years | Periodontitis (stage III & IV) <sup>#</sup> | 1.617 | 1.00~2.61 | 0.050 |
|             | Periodontitis (stage I & II) <sup>#</sup>   | 0.966 | 0.65~1.43 | 0.863 |
| 55-65 years | Periodontitis (stage III & IV) <sup>#</sup> | 1.402 | 1.07~1.84 | 0.015 |
|             | Periodontitis (stage I & II) <sup>#</sup>   | 1.301 | 1.00~1.69 | 0.051 |
| 65-75 years | Periodontitis (stage III & IV) <sup>#</sup> | 1.205 | 0.96~1.42 | 0.113 |
|             | Periodontitis (stage I & II) <sup>#</sup>   | 1.121 | 0.96~1.42 | 0.336 |
| Total       | Periodontitis (stage III & IV) <sup>#</sup> | 1.698 | 1.45~1.99 | 0.000 |
|             | Periodontitis (stage I & II) <sup>#</sup>   | 1.028 | 0.88~1.20 | 0.717 |

### *Relationships of hypertension with periodontal parameters*

Table 5 and Table 6 present the multivariate regression analyses of the relationships of hypertension with periodontal parameters, after adjustments for sex, smoking status, region, duration of education, and annual family income. Hypertension prevalence increased with increases in the proportions of teeth with BOP (OR = 1.204, 95% CI = 1.05-1.38, p = 0.006), PD  $\geq$  4 mm (OR = 1.733, 95% CI = 1.43-2.10, p < 0.001), and PD  $\geq$  6 mm (OR = 2.443, 95% CI = 1.19-5.03, p = 0.015), but it decreased with increases in the proportions of teeth with AL  $\geq$  4 mm (OR = 0.874, 95% CI = 0.73-1.05, p = 0.155) and AL  $\geq$  6 mm (OR = 0.743, 95% CI = 0.53-1.04, p = 0.083). There were significant positive associations of hypertension with the number of teeth with BOP (OR = 1.008, 95% CI = 1.00-1.01, p = 0.001), PD  $\geq$  4 mm (OR = 1.029, 95% CI = 1.02-1.04, p = 0.000), and PD  $\geq$  6mm (OR = 1.071, 95% CI = 1.03-1.11, p < 0.001). There were statistically insignificant negative associations of the presence of hypertension with the proportions of teeth with AL  $\geq$  4 mm and AL  $\geq$  6 mm (Table

6).

Table 5. Relationships between probability of hypertension and percentage of teeth affected with different threshold of periodontal parameters analyzed by logistic regressions with adjustment for age, gender, smoking status, region, years of education, and annual family income.

| PTA     | OR    | 95% CI    | p     |
|---------|-------|-----------|-------|
| BOP+    | 1.204 | 1.05~1.38 | 0.006 |
| PD≥ 4mm | 1.733 | 1.43~2.10 | 0.000 |
| PD≥ 6mm | 2.443 | 1.19~5.03 | 0.015 |
| AL≥ 4mm | 0.874 | 0.73~1.05 | 0.155 |
| AL≥ 6mm | 0.743 | 0.53~1.04 | 0.083 |

AL= attachment loss; BOP = bleeding on probing; PD = probing depth; PTA = percentage of teeth affected.

Table 6. Relationships between probability of hypertension and percentage of teeth affected with different threshold of periodontal parameters analyzed by logistic regressions with adjustment for age, gender, smoking status, region, years of education, and annual family income.

| NTA     | OR    | 95% CI    | p     |
|---------|-------|-----------|-------|
| BOP+    | 1.008 | 1.00~1.01 | 0.001 |
| PD≥ 4mm | 1.029 | 1.02~1.04 | 0.000 |
| PD≥ 6mm | 1.071 | 1.03~1.11 | 0.000 |
| AL≥ 4mm | 0.997 | 0.99~1.01 | 0.507 |
| AL≥ 6mm | 0.987 | 0.97~1.01 | 0.217 |

AL= attachment loss; BOP = bleeding on probing; NTA = number of teeth affected; PD = probing depth.

1  
2  
3  
4 ***Significantly more teeth were missing in hypertensive participants than in***  
5  
6 ***normotensive participants***  
7  
8

9 Table S1 presents a comparison of the number of missing teeth between participants  
10 with and without hypertension. Significantly more teeth were missing in hypertensive  
11 participants than in normotensive participants (4.36 vs. 2.94 teeth). The difference in  
12 the number of missing teeth between hypertensive and normotensive participants  
13 decreased with age. Analysis of the relationship according to smoking status showed  
14 that hypertension prevalence increased and then decreased with increases in the number  
15 of missing teeth.  
16  
17  
18  
19  
20  
21  
22  
23  
24  
25  
26  
27  
28  
29

30 **DISCUSSION**  
31

32 Based on data from the Fourth National Oral Health Survey of China, periodontitis is  
33 significantly and strongly associated with hypertension among Chinese adults,  
34 independent of the effects of age, sex, and smoking. This association between  
35 periodontitis and hypertension has considerable importance<sup>18</sup>.  
36  
37  
38  
39  
40  
41  
42

43 In this study, we used data from a large-scale national survey in which participants were  
44 representative of the Chinese population. Periodontitis was diagnosed in accordance  
45 with the classification proposed at the 2017 World Workshop. The association of  
46 hypertension with periodontitis was assessed according to age and smoking status to  
47 minimize errors and the effects of confounding factors. Periodontitis was associated  
48 with a higher prevalence of hypertension among Chinese adults, independent of known  
49 confounders.  
50  
51  
52  
53  
54  
55  
56  
57  
58  
59  
60

1  
2  
3  
4 Hypertension prevalence increased with periodontitis severity, particularly among  
5  
6 young participants (35-44 years). Therefore, participants with risk factors, particularly  
7  
8 young adults, should engage in healthy lifestyle habits to improve their oral health.  
9  
10 Accordingly, there is a need to improve the education and awareness of dental treatment  
11  
12 and preventive management among individuals at risk for hypertension, particularly in  
13  
14 younger population. Periodontitis and hypertension are chronic diseases; therefore,  
15  
16 substantial exposure time may be necessary for their development. The exposure time  
17  
18 to risk factors may be considerably shorter in younger individuals than that in older  
19  
20 individuals. The influence of the longer exposure time to the common risk factors for  
21  
22 periodontitis and hypertension in older individuals may mask the effects of  
23  
24 periodontitis on the development of hypertension. When the confounding effects of the  
25  
26 risk factors were removed, a link between periodontitis and hypertension was identified.  
27  
28 Therefore, severe periodontitis may have a greater role in the development of  
29  
30 hypertension among younger individuals than among older individuals. The association  
31  
32 of periodontitis with hypertension was also present in never smokers and former  
33  
34 smokers, who had less exposure to common risk factors. The greater susceptibility to  
35  
36 hypertension among young individuals with severe periodontitis may be attributed to  
37  
38 periodontal inflammation.  
39  
40  
41  
42  
43  
44  
45  
46  
47  
48  
49

50 This study evaluated the association between periodontal status and hypertension risk  
51  
52 among young and older adults. Hypertension prevalence increased with periodontitis  
53  
54 severity, which was most prominent in individuals aged 35-44 years. Adult aged < 65  
55  
56 years with hypertension had significantly greater risks of stages III and IV periodontitis,  
57  
58  
59  
60

1  
2  
3  
4 compared with individuals who did not have hypertension. Therefore, healthcare  
5  
6 providers should carefully monitor oral health status in their patients to prevent  
7  
8 hypertension, particularly among adults; they should conduct regular oral examinations  
9  
10 and engage in periodontal disease management.  
11  
12

13  
14 The association between periodontitis and hypertension was also present in participants  
15  
16 who had a greater proportion of teeth with BOP or deep periodontal pockets. The  
17  
18 findings suggest that severe periodontal inflammation, as evidenced by the depth of the  
19  
20 inflamed periodontal pocket and the number of bleeding sites, is associated with  
21  
22 hypertension. In particular, the presence of BOP indicates acute inflammation, which  
23  
24 may lead to systemic effects and subsequent hypertension. The association of chronic  
25  
26 inflammation (i.e., PD) with hypertension suggests that persistent, long-term  
27  
28 inflammation may also underlie this relationship. Our study adds to the existing  
29  
30 literature concerning oral health parameters associated with systemic outcomes <sup>19, 20</sup>.  
31  
32 BOP and PD are the most appropriate clinical measures when the outcome of interest  
33  
34 is an acute disease, whereas AL is more strongly correlated with chronic systemic  
35  
36 conditions <sup>19</sup>. Our findings of an association between hypertension and the severity of  
37  
38 periodontal inflammation (BOP and PD) are consistent with the results of previous  
39  
40 studies <sup>12, 21</sup>. Although the causality of the observed association remains unclear, several  
41  
42 hypotheses have been proposed, including endothelial dysfunction, oxidative stress,  
43  
44 worsening of systemic inflammation in response to bacteraemia, and dissemination of  
45  
46 inflammatory mediators from periodontal pockets, particularly BOP <sup>22</sup>. This association  
47  
48 is further supported by the results of a randomised clinical trial that showed short-term  
49  
50  
51  
52  
53  
54  
55  
56  
57  
58  
59  
60

1  
2  
3  
4 benefits of periodontal therapy on hypertension <sup>23</sup>. Additionally, a recent study  
5  
6 identified oral pathogens associated with high or uncontrolled BP, which supports our  
7  
8 findings <sup>24</sup>.

9  
10  
11 Our finding of an association between the number of missing teeth and hypertension is  
12  
13 consistent with the results reported by Taguchi et al <sup>25</sup>. Missing teeth are indicative of  
14  
15 poor oral health; they presumably were lost because of caries and periodontal disease.  
16  
17 Thus, the absence of several teeth suggests the presence of severe periodontal disease,  
18  
19 caries, or other oral health problems; these may have contributed to the increased risk  
20  
21 of hypertension. This association was strongest in younger adults. There were no  
22  
23 residual confounding effects of age that may have affected our study results. Because  
24  
25 of the high prevalence of hypertension in Chinese adults, further studies are needed to  
26  
27 clarify the association between periodontitis and hypertension. Moreover, attention is  
28  
29 needed concerning the prevention and treatment of periodontitis in the general  
30  
31 population.  
32  
33  
34  
35  
36  
37  
38  
39

40  
41 There is minimal knowledge concerning the natural history of the association between  
42  
43 periodontal disease and hypertension <sup>26-30</sup>. A significant linear trend was observed  
44  
45 between the severity of periodontal disease and hypertension in a cross-sectional study  
46  
47 of 3,352 patients with periodontal disease and 902 controls <sup>28</sup>. A recent prospective  
48  
49 cohort study of Japanese individuals demonstrated an increased incidence of  
50  
51 hypertension among participants with periodontal pockets  $\geq 4$  mm at baseline <sup>29</sup>. Our  
52  
53 findings are consistent with the results in a similar study of 6,617 men and 7,377 women  
54  
55 who underwent dental examinations as part of the NHANES III in the USA <sup>31</sup>. In the  
56  
57  
58  
59  
60



1  
2  
3  
4 present study, after multivariate adjustment, gingival bleeding (BOP) was associated  
5  
6 with an increased risk of hypertension, whereas periodontitis severity (defined using  
7  
8 the 2017 World Workshop on the Classification of Periodontal and Peri-Implant  
9  
10 Diseases and Conditions) and PD were positively associated with hypertension.  
11  
12 Participants with severe periodontal disease (stages III and IV periodontitis) had a  
13  
14 greater risk of hypertension compared with participants who had mild or no periodontal  
15  
16 disease. Furthermore, there was a threshold relationship between severe periodontal  
17  
18 disease and hypertension.  
19  
20  
21  
22  
23

24 To our knowledge, the present study is one of few concerning the association between  
25  
26 periodontal disease and hypertension in a large sample of Chinese adults, after  
27  
28 adjustments for potential confounders. We evaluated several clinical measures of  
29  
30 periodontal disease that allowed analysis of the relationships between various aspects  
31  
32 of periodontal disease and hypertension. We found consistent associations between PD  
33  
34 and hypertension. PD may be indicative of poor oral health and periodontal  
35  
36 inflammation. It was positively associated with hypertension, suggesting a link between  
37  
38 inflammation and hypertension.  
39  
40  
41  
42  
43  
44

45 The main limitation of the present study was that hypertension was self-report and not  
46  
47 based on blood pressure measurements, which is inherent to any epidemiological cohort  
48  
49 study. However, field measurements of blood pressure are regarded as validated tools,  
50  
51 have been used in previous studies<sup>19, 22</sup>, and are considered useful for the analysis of  
52  
53 large samples. Furthermore, although recall and reporting bias could not be excluded,  
54  
55 the results largely reflect real-world clinical practice. First, the self-reported diagnosis  
56  
57  
58  
59  
60

1  
2  
3  
4 was based on a face-to-face interview to ensure the validity and accuracy of the  
5  
6 information. Second, the reliability of the study results is supported by data from the  
7  
8 China Hypertension Survey (2012-2015)<sup>32</sup>, which showed an overall hypertension  
9  
10 prevalence of 23.2% in the Chinese adult population; this prevalence is similar to the  
11  
12 prevalence observed in our study (23.9%).  
13  
14  
15

16  
17 In summary, our epidemiological analysis revealed an association between  
18  
19 periodontitis and hypertension. We collected high-quality, large-scale clinical data  
20  
21 related to periodontal disease and hypertension. We also collected detailed information  
22  
23 regarding potential confounders, including variables that reflect health behavior (e.g.,  
24  
25 flossing). However, there was no strong evidence of a causal relationship. Future  
26  
27 studies should be conducted to improve the understanding of the underlying  
28  
29 mechanisms and interactions between periodontitis and hypertension, which will  
30  
31 further strengthen collaborations between the dental and medical communities.  
32  
33 Preventive measures for periodontal disease in oral health promotion programs should  
34  
35 be emphasised to improve systemic health outcomes.  
36  
37  
38  
39  
40  
41  
42  
43  
44  
45

#### 46 **Contributorship statement**

47  
48 YZ is the major contributor in writing the manuscript and participates in data analysis  
49  
50 and collation. JJ participates in data analysis and collation. WJ participates in writing  
51  
52 the manuscript. XF, BT, DH, HL, BW, CW, SZ, XL, WR, WW, XW, and YS conceive  
53  
54 the study design and draft the protocol. HM conceives the study design, drafts the  
55  
56 protocol, and revise the manuscript. All authors read and approved the final manuscript.  
57  
58  
59  
60

### Competing interests

The authors declare that they have no conflict of interests.

### Funding

This study was supported by "the Public Science and Technology Research Funds Project (2015) - the Fourth National Oral Health Survey (201502002)" and Peking University School and Hospital of Stomatology (PKUSS20180205).

### Data sharing statement

Dataset available from the Fourth National Oral Health Survey of China (2015-2016).

### Ethics approval

The study protocol was approved by the Ethics Committee of the Chinese Stomatological Association (approval no.: 2014-003). Written informed consent was obtained from all participants. This study was performed in accordance with the 2013 revision of the Declaration of Helsinki.

### Reference

1. Williams B, Mancia G, Spiering W, Agabiti Rosei E, Azizi M, Burnier M, et al. 2018 ESC/ESH Guidelines for the management of arterial hypertension: The Task Force for the management of arterial hypertension of the European Society of Cardiology and the European Society of Hypertension: The Task Force for

- 1  
2  
3  
4 the management of arterial hypertension of the European Society of Cardiology  
5 and the European Society of Hypertension. *J Hypertens* 2018; 36 (10): 1953-  
6 2041. doi: 10.1097/HJH.0000000000001940.  
7  
8  
9  
10 2. Mancia G, Fagard R, Narkiewicz K, Redon J, Zanchetti A, Bohm M, et al. 2013  
11 ESH/ESC Practice Guidelines for the Management of Arterial Hypertension.  
12 *Blood Press* 2014; 23 (1): 3-16. doi: 10.3109/08037051.2014.868629.  
13  
14  
15 3. Joffres M, Falaschetti E, Gillespie C, Robitaille C, Loustalot F, Poulter N, et al.  
16 Hypertension prevalence, awareness, treatment and control in national surveys  
17 from England, the USA and Canada, and correlation with stroke and ischaemic  
18 heart disease mortality: a cross-sectional study. *BMJ Open* 2013; 3 (8): e003423.  
19  
20  
21  
22  
23  
24  
25  
26 4. Carretero OA, Oparil S. Essential hypertension. Part I: definition and etiology.  
27 *Circulation* 2000; 101 (3): 329-335. doi: 10.1161/01.cir.101.3.329.  
28  
29  
30  
31 5. Czopek A, Moorhouse R, Guyonnet L, Farrah T, Lenoir O, Owen E, et al. A  
32 novel role for myeloid endothelin-B receptors in hypertension. *Eur Heart J* 2019;  
33 40 (9): 768-784. doi: 10.1093/eurheartj/ehy881.  
34  
35  
36 6. Drummond GR, Vinh A, Guzik TJ, Sobey CG. Immune mechanisms of  
37 hypertension. *Nat Rev Immunol* 2019; 19 (8): 517-532. doi: 10.1038/s41577-  
38 019-0160-5.  
39  
40  
41 7. Chapple IL, Genco R, Working group 2 of joint EFPAAPw. Diabetes and  
42 periodontal diseases: consensus report of the Joint EFP/AAP Workshop on  
43 Periodontitis and Systemic Diseases. *J Clin Periodontol* 2013; 40 Suppl 14  
44 S106-112. doi: 10.1111/jcpe.12077.  
45  
46  
47  
48 8. Lu HX, Tao DY, Lo ECM, Li R, Wang X, Tai BJ, et al. The 4th National Oral  
49 Health Survey in the Mainland of China: Background and Methodology. *Chin*  
50 *J Dent Res* 2018; 21 (3): 161-165. doi: 10.3290/j.cjdr.a41079.  
51  
52  
53  
54 9. Sun HY, Jiang H, Du MQ, Wang X, Feng XP, Hu Y, et al. The Prevalence and  
55 Associated Factors of Periodontal Disease among 35 to 44-year-old Chinese  
56 Adults in the 4th National Oral Health Survey. *Chin J Dent Res* 2018; 21 (4):  
57 241-247. doi: 10.3290/j.cjdr.a41082.  
58  
59  
60

10. Tonetti MS, D'Aiuto F, Nibali L, Donald A, Storry C, Parkar M, et al. Treatment of periodontitis and endothelial function. *N Engl J Med* 2007; 356 (9): 911-920. doi: 10.1056/NEJMoa063186.
11. Munoz Aguilera E, Suvan J, Buti J, Czesnikiewicz-Guzik M, Barbosa Ribeiro A, Orlandi M, et al. Periodontitis is associated with hypertension: a systematic review and meta-analysis. *Cardiovasc Res* 2020; 116 (1): 28-39. doi: 10.1093/cvr/cvz201.
12. Pietropaoli D, Del Pinto R, Ferri C, Wright JT, Jr., Giannoni M, Ortu E, et al. Poor Oral Health and Blood Pressure Control Among US Hypertensive Adults. *Hypertension* 2018; 72 (6): 1365-1373. doi: 10.1161/HYPERTENSIONAHA.118.11528.
13. Boos CJ, Lip GY. Is hypertension an inflammatory process? *Curr Pharm Des* 2006; 12 (13): 1623-1635. doi: 10.2174/138161206776843313.
14. Li JJ. Inflammation in hypertension: primary evidence. *Chin Med J (Engl)* 2006; 119 (14): 1215-1221.
15. Li JJ, Fang CH, Hui RT. Is hypertension an inflammatory disease? *Med Hypotheses* 2005; 64 (2): 236-240. doi: 10.1016/j.mehy.2004.06.017.
16. Savoia C, Schiffrin EL. Inflammation in hypertension. *Curr Opin Nephrol Hypertens* 2006; 15 (2): 152-158. doi: 10.1097/01.mnh.0000203189.57513.76.
17. Graetz C, Mann L, Krois J, Salzer S, Kahl M, Springer C, et al. Comparison of periodontitis patients' classification in the 2018 versus 1999 classification. *J Clin Periodontol* 2019; 46 (9): 908-917. doi: 10.1111/jcpe.13157.
18. Chobanian AV, Bakris GL, Black HR, Cushman WC, Green LA, Izzo JL, Jr., et al. Seventh report of the Joint National Committee on Prevention, Detection, Evaluation, and Treatment of High Blood Pressure. *Hypertension* 2003; 42 (6): 1206-1252. doi: 10.1161/01.HYP.0000107251.49515.c2.
19. Beck JD, Offenbacher S. Relationships among clinical measures of periodontal disease and their associations with systemic markers. *Ann Periodontol* 2002; 7 (1): 79-89. doi: 10.1902/annals.2002.7.1.79.
20. Demmer RT, Kocher T, Schwahn C, Volzke H, Jacobs DR, Jr., Desvarieux M.

- Refining exposure definitions for studies of periodontal disease and systemic disease associations. *Community Dent Oral Epidemiol* 2008; 36 (6): 493-502. doi: 10.1111/j.1600-0528.2008.00435.x.
21. Martin-Cabezas R, Seelam N, Petit C, Agossa K, Gaertner S, Tenenbaum H, et al. Association between periodontitis and arterial hypertension: A systematic review and meta-analysis. *Am Heart J* 2016; 180 98-112. doi: 10.1016/j.ahj.2016.07.018.
22. Macedo Paizan ML, Vilela-Martin JF. Is there an association between periodontitis and hypertension? *Curr Cardiol Rev* 2014; 10 (4): 355-361. doi: 10.2174/1573403x10666140416094901.
23. Czesnikiewicz-Guzik M, Osmenda G, Siedlinski M, Nosalski R, Pelka P, Nowakowski D, et al. Causal association between periodontitis and hypertension: evidence from Mendelian randomization and a randomized controlled trial of non-surgical periodontal therapy. *Eur Heart J* 2019; 40 (42): 3459-3470. doi: 10.1093/eurheartj/ehz646.
24. Pietropaoli D, Del Pinto R, Ferri C, Ortu E, Monaco A. Definition of hypertension-associated oral pathogens in NHANES. *J Periodontol* 2019; 90 (8): 866-876. doi: 10.1002/JPER.19-0046.
25. Taguchi A, Sanada M, Swei Y, Ohtsuka M, Lee K, Tanimoto K, et al. Tooth loss is associated with an increased risk of hypertension in postmenopausal women. *Hypertension* 2004; 43 (6): 1297-1300. doi: 10.1161/01.HYP.0000128335.45571.ce.
26. D'Aiuto F, Parkar M, Nibali L, Suvan J, Lessem J, Tonetti MS. Periodontal infections cause changes in traditional and novel cardiovascular risk factors: results from a randomized controlled clinical trial. *Am Heart J* 2006; 151 (5): 977-984. doi: 10.1016/j.ahj.2005.06.018.
27. D'Aiuto F, Sabbah W, Netuveli G, Donos N, Hingorani AD, Deanfield J, et al. Association of the metabolic syndrome with severe periodontitis in a large U.S. population-based survey. *J Clin Endocrinol Metab* 2008; 93 (10): 3989-3994. doi: 10.1210/jc.2007-2522.

- 1  
2  
3  
4 28. Holmlund A, Holm G, Lind L. Severity of periodontal disease and number of  
5 remaining teeth are related to the prevalence of myocardial infarction and  
6 hypertension in a study based on 4,254 subjects. *J Periodontol* 2006; 77 (7):  
7 1173-1178. doi: 10.1902/jop.2006.050233.  
8  
9  
10  
11 29. Morita T, Yamazaki Y, Mita A, Takada K, Seto M, Nishinoue N, et al. A cohort  
12 study on the association between periodontal disease and the development of  
13 metabolic syndrome. *J Periodontol* 2010; 81 (4): 512-519. doi:  
14 10.1902/jop.2010.090594.  
15  
16  
17 30. Rivas-Tumanyan S, Spiegelman D, Curhan GC, Forman JP, Joshipura KJ.  
18 Periodontal disease and incidence of hypertension in the health professionals  
19 follow-up study. *Am J Hypertens* 2012; 25 (7): 770-776. doi:  
20 10.1038/ajh.2012.32.  
21  
22  
23 31. Dye BA, Barker LK, Selwitz RH, Lewis BG, Wu T, Fryar CD, et al. Overview  
24 and quality assurance for the National Health and Nutrition Examination Survey  
25 (NHANES) oral health component, 1999-2002. *Community Dent Oral*  
26 *Epidemiol* 2007; 35 (2): 140-151. doi: 10.1111/j.1600-0528.2007.00310.x.  
27  
28  
29 32. Wang Z, Chen Z, Zhang L, Wang X, Hao G, Zhang Z, et al. Status of  
30 Hypertension in China: Results From the China Hypertension Survey, 2012-  
31 2015. *Circulation* 2018; 137 (22): 2344-2356. doi:  
32 10.1161/CIRCULATIONAHA.117.032380.  
33  
34  
35  
36  
37  
38  
39  
40  
41  
42  
43  
44  
45  
46  
47  
48  
49  
50  
51  
52  
53  
54  
55  
56  
57  
58  
59  
60

Table s1. Number of missing teeth by age groups and smoking status

|                | NT   |           | HT   |           | p*    |
|----------------|------|-----------|------|-----------|-------|
|                | Mean | 95% CI    | Mean | 95% CI    |       |
| 35-44          | 0.70 | 0.65~0.75 | 1.01 | 0.74~1.28 | 0.024 |
| 55-64          | 3.26 | 3.10~3.43 | 3.42 | 3.15~3.69 | 0.305 |
| 65-74          | 6.04 | 5.79~6.30 | 5.70 | 5.39~6.01 | 0.104 |
| Non-smoker     | 3.30 | 3.10~3.50 | 4.27 | 3.87~4.67 | 0.000 |
| Current smoker | 2.70 | 2.58~2.81 | 3.42 | 3.95~4.44 | 0.000 |
| Former smoker  | 3.55 | 3.21~3.89 | 5.70 | 4.68~5.98 | 0.000 |
| Total          | 2.94 | 2.84~3.04 | 4.35 | 4.15~4.55 | 0.000 |

HT = Hypertension; NT = Normotension;

\* significant difference by Student's t test.



STROBE Statement—Checklist of items that should be included in reports of *cross-sectional studies*

|                              | Item No                                                                            | Recommendation                                                                                                                                                                                    | Page No |
|------------------------------|------------------------------------------------------------------------------------|---------------------------------------------------------------------------------------------------------------------------------------------------------------------------------------------------|---------|
| <b>Title and abstract</b>    | 1                                                                                  | (a) Indicate the study's design with a commonly used term in the title or the abstract                                                                                                            | 1       |
|                              |                                                                                    | (b) Provide in the abstract an informative and balanced summary of what was done and what was found                                                                                               | 3       |
| <b>Introduction</b>          |                                                                                    |                                                                                                                                                                                                   |         |
| Background/rationale         | 2                                                                                  | Explain the scientific background and rationale for the investigation being reported                                                                                                              | 4       |
| Objectives                   | 3                                                                                  | State specific objectives, including any prespecified hypotheses                                                                                                                                  | 5       |
| <b>Methods</b>               |                                                                                    |                                                                                                                                                                                                   |         |
| Study design                 | 4                                                                                  | Present key elements of study design early in the paper                                                                                                                                           | 5       |
| Setting                      | 5                                                                                  | Describe the setting, locations, and relevant dates, including periods of recruitment, exposure, follow-up, and data collection                                                                   | 6-8     |
| Participants                 | 6                                                                                  | (a) Give the eligibility criteria, and the sources and methods of selection of participants                                                                                                       | 5       |
| Variables                    | 7                                                                                  | Clearly define all outcomes, exposures, predictors, potential confounders, and effect modifiers. Give diagnostic criteria, if applicable                                                          | 6-8     |
| Data sources/<br>measurement | 8*                                                                                 | For each variable of interest, give sources of data and details of methods of assessment (measurement). Describe comparability of assessment methods if there is more than one group              | 7       |
| Bias                         | 9                                                                                  | Describe any efforts to address potential sources of bias                                                                                                                                         | 7       |
| Study size                   | 10                                                                                 | Explain how the study size was arrived at                                                                                                                                                         | 5       |
| Quantitative variables       | 11                                                                                 | Explain how quantitative variables were handled in the analyses. If applicable, describe which groupings were chosen and why                                                                      | 7       |
| Statistical methods          | 12                                                                                 | (a) Describe all statistical methods, including those used to control for confounding                                                                                                             | 8-9     |
|                              |                                                                                    | (b) Describe any methods used to examine subgroups and interactions                                                                                                                               | 8-9     |
|                              | (c) Explain how missing data were addressed                                        | 8-9                                                                                                                                                                                               |         |
|                              | (d) If applicable, describe analytical methods taking account of sampling strategy | NA                                                                                                                                                                                                |         |
|                              | (e) Describe any sensitivity analyses                                              | NA                                                                                                                                                                                                |         |
| <b>Results</b>               |                                                                                    |                                                                                                                                                                                                   |         |
| Participants                 | 13*                                                                                | (a) Report numbers of individuals at each stage of study—eg numbers potentially eligible, examined for eligibility, confirmed eligible, included in the study, completing follow-up, and analysed | 9       |
|                              |                                                                                    | (b) Give reasons for non-participation at each stage                                                                                                                                              | 9       |
|                              |                                                                                    | (c) Consider use of a flow diagram                                                                                                                                                                | NA      |
| Descriptive data             | 14*                                                                                | (a) Give characteristics of study participants (eg demographic, clinical, social) and information on exposures and potential confounders                                                          | 9-10    |
|                              |                                                                                    | (b) Indicate number of participants with missing data for each variable of interest                                                                                                               | NA      |
| Outcome data                 | 15*                                                                                | Report numbers of outcome events or summary measures                                                                                                                                              | 10-13   |

|    |                          |    |                                                                                                                                                                                                              |
|----|--------------------------|----|--------------------------------------------------------------------------------------------------------------------------------------------------------------------------------------------------------------|
| 1  |                          |    |                                                                                                                                                                                                              |
| 2  | Main results             | 16 | (a) Give unadjusted estimates and, if applicable, confounder-adjusted estimates and their precision (eg, 95% confidence interval). Make clear which confounders were adjusted for and why they were included |
| 3  |                          |    | 12-13                                                                                                                                                                                                        |
| 4  |                          |    |                                                                                                                                                                                                              |
| 5  |                          |    |                                                                                                                                                                                                              |
| 6  |                          |    | (b) Report category boundaries when continuous variables were categorized                                                                                                                                    |
| 7  |                          |    | NA                                                                                                                                                                                                           |
| 8  |                          |    |                                                                                                                                                                                                              |
| 9  |                          |    | (c) If relevant, consider translating estimates of relative risk into absolute risk for a meaningful time period                                                                                             |
| 10 |                          |    | NA                                                                                                                                                                                                           |
| 11 | Other analyses           | 17 | Report other analyses done—eg analyses of subgroups and interactions, and sensitivity analyses                                                                                                               |
| 12 |                          |    | NA                                                                                                                                                                                                           |
| 13 |                          |    |                                                                                                                                                                                                              |
| 14 | <b>Discussion</b>        |    |                                                                                                                                                                                                              |
| 15 | Key results              | 18 | Summarise key results with reference to study objectives                                                                                                                                                     |
| 16 |                          |    | 13-14                                                                                                                                                                                                        |
| 17 |                          |    |                                                                                                                                                                                                              |
| 18 | Limitations              | 19 | Discuss limitations of the study, taking into account sources of potential bias or imprecision. Discuss both direction and magnitude of any potential bias                                                   |
| 19 |                          |    | 18                                                                                                                                                                                                           |
| 20 |                          |    |                                                                                                                                                                                                              |
| 21 | Interpretation           | 20 | Give a cautious overall interpretation of results considering objectives, limitations, multiplicity of analyses, results from similar studies, and other relevant evidence                                   |
| 22 |                          |    | 14-17                                                                                                                                                                                                        |
| 23 |                          |    |                                                                                                                                                                                                              |
| 24 |                          |    |                                                                                                                                                                                                              |
| 25 | Generalisability         | 21 | Discuss the generalisability (external validity) of the study results                                                                                                                                        |
| 26 |                          |    | 17                                                                                                                                                                                                           |
| 27 | <b>Other information</b> |    |                                                                                                                                                                                                              |
| 28 | Funding                  | 22 | Give the source of funding and the role of the funders for the present study and, if applicable, for the original study on which the present article is based                                                |
| 29 |                          |    | 19                                                                                                                                                                                                           |
| 30 |                          |    |                                                                                                                                                                                                              |
| 31 |                          |    |                                                                                                                                                                                                              |
| 32 |                          |    |                                                                                                                                                                                                              |

\*Give information separately for exposed and unexposed groups.

**Note:** An Explanation and Elaboration article discusses each checklist item and gives methodological background and published examples of transparent reporting. The STROBE checklist is best used in conjunction with this article (freely available on the Web sites of PLoS Medicine at <http://www.plosmedicine.org/>, Annals of Internal Medicine at <http://www.annals.org/>, and Epidemiology at <http://www.epidem.com/>). Information on the STROBE Initiative is available at [www.strobe-statement.org](http://www.strobe-statement.org).

# BMJ Open

## Association Between Periodontitis and Hypertension: Cross-Sectional Survey from the Fourth National Oral Health Survey in China (2015-2016)

|                                 |                                                                                                                                                                                                                                                                                                                                                                                                                                                                                                                                                                                                                                                                                                                                                                                                                                                                                                                                                                                                                                                                                                                                                                        |
|---------------------------------|------------------------------------------------------------------------------------------------------------------------------------------------------------------------------------------------------------------------------------------------------------------------------------------------------------------------------------------------------------------------------------------------------------------------------------------------------------------------------------------------------------------------------------------------------------------------------------------------------------------------------------------------------------------------------------------------------------------------------------------------------------------------------------------------------------------------------------------------------------------------------------------------------------------------------------------------------------------------------------------------------------------------------------------------------------------------------------------------------------------------------------------------------------------------|
| Journal:                        | <i>BMJ Open</i>                                                                                                                                                                                                                                                                                                                                                                                                                                                                                                                                                                                                                                                                                                                                                                                                                                                                                                                                                                                                                                                                                                                                                        |
| Manuscript ID                   | bmjopen-2022-068724.R1                                                                                                                                                                                                                                                                                                                                                                                                                                                                                                                                                                                                                                                                                                                                                                                                                                                                                                                                                                                                                                                                                                                                                 |
| Article Type:                   | Original research                                                                                                                                                                                                                                                                                                                                                                                                                                                                                                                                                                                                                                                                                                                                                                                                                                                                                                                                                                                                                                                                                                                                                      |
| Date Submitted by the Author:   | 06-Nov-2022                                                                                                                                                                                                                                                                                                                                                                                                                                                                                                                                                                                                                                                                                                                                                                                                                                                                                                                                                                                                                                                                                                                                                            |
| Complete List of Authors:       | Zhan, Yalin; Peking University Hospital of Stomatology, First Clinical Division<br>Jiao, Jian; Peking University Hospital of Stomatology, Department of Periodontology<br>Jing, Wu-di; Peking University Hospital of Stomatology<br>Feng, Xiping; Shanghai Jiao Tong University School of Medicine Affiliated Ninth People's Hospital, Department of Preventive Dentistry<br>Tai, Baojun; Wuhan University, School & Hospital of Stomatology<br>Hu, Deyu; Sichuan University, West China School of Stomatology<br>Lin, Huan-cai; Sun Yat-Sen University, Guanghua School of Stomatology, Hospital of Stomatology<br>Wang, Bo; Peking University Hospital of Stomatology<br>Wang, Chunxiao; Chinese Center for Disease Control and Prevention<br>Zheng, Shuguo; Peking University Hospital of Stomatology<br>Liu, Xuenan; Peking University Hospital of Stomatology<br>Rong, Wensheng; Peking University Hospital of Stomatology<br>Wang, Weijian; Peking University Hospital of Stomatology<br>Wang, Xing; Peking University Hospital of Stomatology<br>Si, Yan; Peking University Hospital of Stomatology<br>Meng, Huanxin; Peking University Hospital of Stomatology |
| <b>Primary Subject Heading</b>: | Dentistry and oral medicine                                                                                                                                                                                                                                                                                                                                                                                                                                                                                                                                                                                                                                                                                                                                                                                                                                                                                                                                                                                                                                                                                                                                            |
| Secondary Subject Heading:      | Infectious diseases, Cardiovascular medicine                                                                                                                                                                                                                                                                                                                                                                                                                                                                                                                                                                                                                                                                                                                                                                                                                                                                                                                                                                                                                                                                                                                           |
| Keywords:                       | Hypertension < CARDIOLOGY, ORAL MEDICINE, Epidemiology < TROPICAL MEDICINE, Public health < INFECTIOUS DISEASES                                                                                                                                                                                                                                                                                                                                                                                                                                                                                                                                                                                                                                                                                                                                                                                                                                                                                                                                                                                                                                                        |
|                                 |                                                                                                                                                                                                                                                                                                                                                                                                                                                                                                                                                                                                                                                                                                                                                                                                                                                                                                                                                                                                                                                                                                                                                                        |

SCHOLARONE™  
Manuscripts



I, the Submitting Author has the right to grant and does grant on behalf of all authors of the Work (as defined in the below author licence), an exclusive licence and/or a non-exclusive licence for contributions from authors who are: i) UK Crown employees; ii) where BMJ has agreed a CC-BY licence shall apply, and/or iii) in accordance with the terms applicable for US Federal Government officers or employees acting as part of their official duties; on a worldwide, perpetual, irrevocable, royalty-free basis to BMJ Publishing Group Ltd ("BMJ") its licensees and where the relevant Journal is co-owned by BMJ to the co-owners of the Journal, to publish the Work in this journal and any other BMJ products and to exploit all rights, as set out in our [licence](#).

The Submitting Author accepts and understands that any supply made under these terms is made by BMJ to the Submitting Author unless you are acting as an employee on behalf of your employer or a postgraduate student of an affiliated institution which is paying any applicable article publishing charge ("APC") for Open Access articles. Where the Submitting Author wishes to make the Work available on an Open Access basis (and intends to pay the relevant APC), the terms of reuse of such Open Access shall be governed by a Creative Commons licence – details of these licences and which [Creative Commons](#) licence will apply to this Work are set out in our licence referred to above.

Other than as permitted in any relevant BMJ Author's Self Archiving Policies, I confirm this Work has not been accepted for publication elsewhere, is not being considered for publication elsewhere and does not duplicate material already published. I confirm all authors consent to publication of this Work and authorise the granting of this licence.

1  
2  
3  
4  
5 **Association Between Periodontitis and Hypertension: Cross-Sectional Survey**

6  
7 **from** the Fourth National Oral Health Survey in China (2015-2016)

8  
9  
10 **Running title: Association between** periodontitis and hypertension

11  
12  
13  
14  
15 Ya-lin Zhan<sup>1\*</sup>, PhD, Jian Jiao<sup>1\*</sup>, DDS, Wu-di Jing<sup>1</sup>, DDS., Xi-ping Feng<sup>2</sup>, PhD, Bao-jun  
16  
17 Tai<sup>3</sup>, PhD, De-yu Hu<sup>4</sup>, PhD, Huan-cai Lin<sup>5</sup>, PhD, Bo Wang<sup>6</sup>, EMBA, Chun-xiao Wang<sup>7</sup>,  
18  
19 PhD, Shu-guo Zheng<sup>8</sup>, PhD, Xue-nan Liu<sup>8</sup>, PhD, Wen-sheng Rong<sup>8</sup>, PhD, Wei-jian  
20  
21 Wang<sup>8</sup>, PhD, Xing Wang<sup>6</sup>, PhD, Yan Si<sup>8</sup>, PhD, Huan-xin Meng<sup>1</sup>, PhD,<sup>†</sup>

22  
23  
24  
25  
26  
27  
28 <sup>1</sup> Department of Periodontology, Peking University School and Hospital of  
29  
30 Stomatology, National Engineering Laboratory for Digital and Material Technology of  
31  
32 Stomatology, Beijing Key Laboratory of Digital Stomatology, Beijing, P.R. China

33  
34  
35  
36 <sup>2</sup> Shanghai Ninth People's Hospital, Shanghai Jiao Tong University School of Medicine,  
37  
38 Shanghai, P.R. China.

39  
40  
41 <sup>3</sup> School & Hospital of Stomatology, Wuhan University, Wuhan, P.R. China.

42  
43  
44 <sup>4</sup> West China School of Stomatology, Sichuan University, Chengdu, P.R. China.

45  
46  
47 <sup>5</sup> Guanghua School of Stomatology, Hospital of Stomatology, Sun Yat-sen University,  
48  
49 Guangzhou, P.R. China.

50  
51  
52 <sup>6</sup> Chinese Stomatological Association, Beijing, P.R. China.

53  
54  
55 <sup>7</sup> Chinese Center for Disease Control and Prevention, Beijing, P.R. China.

56  
57  
58 <sup>8</sup> Department of Preventive Dentistry, Peking University School and Hospital of  
59  
60 Stomatology, National Engineering Laboratory for Digital and Material Technology of

1  
2  
3  
4 Stomatology, Beijing Key Laboratory of Digital Stomatology, Beijing, P.R. China  
5  
6  
7  
8

9 \*The two authors contributed equally to this work.  
10

11 † corresponding author  
12  
13  
14  
15  
16

17 **Corresponding author:** Huanxin Meng  
18

19 Department of Periodontology, Peking University School and Hospital of Stomatology,  
20  
21 National Engineering Laboratory for Digital and Material Technology of Stomatology,  
22  
23 Beijing Key Laboratory of Digital Stomatology Zhongguancun Nandajie 22, Haidian  
24  
25 District, 100081, Beijing, P.R.China  
26  
27  
28

29  
30 Email: [kqhxmeng@126.com](mailto:kqhxmeng@126.com)  
31

32 Tel: +86-010-82195522; Fax: +86-010-82195522.  
33  
34  
35  
36  
37

## 38 **ABSTRACT**

39  
40 **Objectives** To evaluate the association between periodontitis severity and hypertension  
41  
42 based on Chinese epidemiological data.  
43  
44

45 **Design** This cross-sectional survey enrolled adults from the Fourth National Oral  
46  
47 Health Survey of China (2015-2016).  
48  
49

50 **Setting** The study data were obtained from the Fourth National Oral Health Survey of  
51  
52 China (2015-2016).  
53  
54

55 **Participants** The study included dentate individuals aged 35-44 years (n = 4,409),  
56  
57 55-64 years (n = 4,568), and 65-74 years (n = 4,218).  
58  
59  
60

1  
2  
3  
4 **Primary and secondary outcome measures** Periodontal status, defined on the basis  
5  
6 of the 2018 classification scheme, and periodontal parameters (e.g., bleeding on  
7  
8 probing [BOP], probing depth [PD], and attachment loss [AL]) were compared between  
9  
10 hypertensive and normotensive individuals. Smoothed scatterplots were constructed to  
11  
12 demonstrate the associations of periodontal parameters and periodontal status with  
13  
14 hypertension.  
15  
16  
17  
18

19 **Results** Severe periodontitis (stages III and IV) was present in 41.34% and 27.99% of  
20  
21 hypertensive and normotensive individuals, respectively ( $p < 0.001$ ). The prevalence of  
22  
23 severe periodontitis was increase in hypertensive individuals than that in normotensive  
24  
25 individuals among participants aged 35-44 years (18.12% and 10.09%,  $p < 0.001$ ) and  
26  
27 55-64 years (40.12% and 36.77%,  $p = 0.035$ ), but not in participants aged 65-74 years  
28  
29 (46.40% and 45.14%,  $p = 0.429$ ). Therefore, the difference in periodontal status  
30  
31 between hypertensive and normotensive individulas decreased with age. There were  
32  
33 increased prevalences of BOP,  $PD \geq 4$  mm, and  $PD \geq 6$  mm in hypertensive  
34  
35 individuals than in normotensive individuals (57.71% vs 53.12%, 22.11% vs 16.29%,  
36  
37 and 2.07% vs 1.22%, respectively). Periodontitis severity and the proportion of teeth  
38  
39 with  $PD \geq 4$  or  $\geq 6$  mm were positively associated with hypertension.  
40  
41  
42  
43  
44  
45  
46  
47

48 **Conclusion** Based on the data of the Fourth National Oral Health Survey of China,  
49  
50 periodontitis is significantly and strongly associated with hypertension among Chinese  
51  
52 adults, independent of the effects of age, sex, and smoking.  
53  
54

55 **Key Words:** Hypertension, oral medicine, epidemiology, public health.  
56  
57  
58  
59  
60

### Strengths and limitations of this study

- The subject group was based on a large-scale national survey in China, and the sample size of the study was relatively large.
- Periodontitis was diagnosed in accordance with the classification proposed at the 2017 World Workshop.
- Hypertension was self-report and not based on blood pressure measurements.

### INTRODUCTION

Hypertension, which affects 45% of the global population, is the most common cardiovascular disease (CVDs) worldwide <sup>1,2</sup>. It is defined as systolic or diastolic blood pressure (BP) of  $\geq 140$  or  $\geq 90$  mmHg, respectively. Hypertension is frequently poorly controlled and untreated <sup>3</sup>. It is a complex disease with multiple causes and a major risk factor for CVDs <sup>4</sup>. Oxidative stress, endothelial dysfunction, and inflammation are associated with the development of hypertension <sup>5</sup>. The results of experimental and clinical studies suggest that inflammation has a major role in the development of hypertension <sup>6</sup>. Chronic inflammation predisposes to the development of pro-hypertensive inflammation.

Periodontal disease, an immune-inflammatory reaction to plaque biofilms <sup>7</sup>, has received substantial attention because of its association with CVDs. The Global Burden of Disease Study revealed that periodontitis was the sixth most prevalent disease worldwide. Periodontitis affects 743 million people worldwide (11.2% of the global population); the prevalence is higher in China than in other countries. The Fourth



1  
2  
3  
4 National Oral Health Survey of China showed that 90.9% individuals aged 35-44 years  
5  
6 had periodontal disease <sup>8,9</sup>. The low-grade inflammation associated with periodontitis  
7  
8 has harmful effects on the endothelial function, which may result in hypertension <sup>10</sup>. A  
9  
10 recent study revealed that individuals with periodontitis have increased risks of  
11  
12 hypertension and antihypertensive treatment failure <sup>11,12</sup>. Previous studies have  
13  
14 suggested that dental treatment can improve blood pressure, although the findings have  
15  
16 been inconclusive and further studies are needed <sup>13-16</sup>.

17  
18  
19  
20  
21  
22 Periodontitis and hypertension are major health problems, and their association  
23  
24 received considerable public health attention. Therefore, we evaluated the relationship  
25  
26 between periodontitis and hypertension based on the data from the Fourth National Oral  
27  
28 Health Survey of China. We sought to determine whether individuals with periodontitis  
29  
30 are more likely to have hypertension compared with individuals who do not have  
31  
32 periodontitis; we also sought to determine whether periodontitis severity is associated  
33  
34 with hypertension.  
35  
36  
37  
38  
39  
40  
41  
42

## 43 **MATERIALS AND METHODS**

### 44 *Study design and sample*

45  
46  
47  
48 This cross-sectional study obtained data from adult participants of the Fourth National  
49  
50 Oral Health Survey of China (2015-2016) <sup>8</sup>. The planned sample size was 4,230 each  
51  
52 for the age groups 35-44, 55-64 and 65-74 years. We excluded data from edentulous  
53  
54 participants and from participants without complete information. Finally, 13,195  
55  
56 individuals were included (4,409, 4,568, and 4,218 individuals aged 35-44, 55-64, and  
57  
58  
59  
60

1  
2  
3  
4 65-74 years, respectively).

5  
6 ***Ethics approval***  
7

8  
9 The study protocol was approved by the Ethics Committee of the Chinese  
10 Stomatological Association (approval no.: 2014-003). Written informed consent was  
11  
12 obtained from all participants. This study was performed in accordance with the 2013  
13  
14 revision of the Declaration of Helsinki.  
15  
16  
17  
18

19  
20  
21  
22 ***Data collection***  
23

24 We collected data related to oral examination findings and questionnaire answers.  
25

26  
27 1. *Periodontal examination*  
28

29  
30 Periodontal examinations were performed using a community periodontal index probe.  
31  
32 A full-mouth examination was performed, during which the probe was walked along  
33  
34 the gingival crevices using a force of  $\leq 20$  g to assess bleeding on probing (BOP), the  
35  
36 presence of calculus, probing depth (PD), and attachment loss (AL). For each parameter,  
37  
38 each tooth was scored according to the condition of the most severely affected site.  
39  
40 Training programs were conducted for examiner calibration before the survey. The  
41  
42 reliability of the results was assessed using kappa values; kappa values for periodontal  
43  
44 pocket depth were  $\geq 0.6$ . Additionally, 5% of the participants were randomly selected  
45  
46 for assessment of inter-examiner reproducibility. The kappa values for all age-groups  
47  
48 were 0.76-0.80.  
49  
50  
51  
52  
53  
54

55  
56  
57  
58 ***Patient and public involvement***  
59  
60

1  
2  
3  
4 The study participants or the public were not involved in the design, or conduct, or  
5  
6 reporting, or dissemination plans of our research.  
7  
8  
9

### 10 11 ***Study parameters*** 12

13  
14 Supragingival and subgingival calculus were identified by visual examination and  
15  
16 probing, respectively (0 = absent, 1 = present, 9 = tooth excluded, and X = tooth not  
17  
18 present). PD was recorded as 0 (1–3 mm), 1 (4–5 mm), 2 ( $\geq 6$  mm), 9 (tooth excluded),  
19  
20 or X (tooth not present). BOP was recorded as 0 (absent), 1 (present), 9 (tooth  
21  
22 excluded), or X (tooth not present). AL was measured as the distance from the  
23  
24 cementoenamel junction to the bottom of the periodontal pocket; it was recorded as  
25  
26 0 (0–3 mm), 1 (4–5 mm), 2 (6–8 mm), 3 (9–11 mm), 4 ( $\geq 12$  mm), 9 (tooth excluded),  
27  
28 or X (tooth not present).  
29  
30  
31  
32  
33  
34

35 The classification scheme proposed at the 2017 World Workshop on the Classification  
36  
37 of Periodontal and Per-Implant Diseases and Conditions was used to classify the  
38  
39 periodontal status as periodontally healthy ( $< 10\%$  BOP-positive sites and  $PD \leq 3$  mm)  
40  
41 or gingivitis ( $\geq 10\%$  BOP-positive sites and  $PD \leq 3$  mm). Periodontitis was staged  
42  
43 using the algorithm developed by Tonetti *et al* <sup>17</sup>. For each tooth, stages I-III  
44  
45 periodontitis were defined as AL of 1–2 mm, 3–4 mm, and  $\geq 5$  mm, respectively. We  
46  
47 also considered the number of teeth lost when classifying periodontitis: stages I and II,  
48  
49 no tooth loss; stage III,  $\leq 4$  teeth lost; and stage IV,  $\geq 5$  teeth lost. The cause of tooth  
50  
51 loss was not considered. Finally, we evaluated the complexity of patient management.  
52  
53  
54  
55  
56  
57  
58 Stage II patients were reclassified as stage III if the maximum PD was  $\geq 6$  mm. Stage  
59  
60

1  
2  
3  
4 III patients were reclassified as stage IV if there were < 10 opposing pairs of teeth).

5  
6 Stages of periodontitis reflects the severity and complexity of managing the individual  
7  
8  
9 patient.

## 10 11 12 13 14 *2. Interview data from the questionnaire*

15  
16  
17 Questionnaires were administered during in-person interviews to collect data regarding  
18  
19 demographics, socioeconomic status, habits, dental history, and health attitudes. The  
20  
21 following information was collected for analysis: age (years), annual family income (in  
22  
23 increments of 10,000 yuan), sex (male or female), duration of education (years), self-  
24  
25 reported hypertension (yes or no), smoking status (current smoker, former smoker, or  
26  
27 non-smoker), and region (urban or rural).  
28  
29  
30  
31  
32  
33  
34

## 35 *Statistical analyses*

36  
37  
38 Statistical analyses were performed using SPSS (version 19; IBM Corp., Armonk, NY,  
39  
40 USA) or R (version 3.6.1; R Foundation for Statistical Computing, Vienna, Austria).  
41  
42 The primary outcome was periodontal status (healthy, gingivitis, and stages I-IV  
43  
44 periodontitis). The secondary outcomes were the proportions of BOP-positive teeth,  
45  
46 teeth with PD  $\geq 4$  and  $\geq 6$  mm, teeth with AL  $\geq 4$ ,  $\geq 6$ , and  $\geq 9$  mm; and missing  
47  
48  
49  
50  
51 teeth. First, descriptive analysis was performed. Quantitative data were reported as  
52  
53 means and standard deviations; categorical data were reported as numbers and  
54  
55 percentages. Periodontal parameters were compared between hypertensive and  
56  
57 normotensive individuals; subgroup analyses were conducted according to age group  
58  
59  
60

1  
2  
3  
4 and smoking status. Periodontal status and parameters were analysed using the chi-  
5  
6 square test. Additionally, smoothed scatterplots based on generalised additive models  
7  
8 were constructed, with adjustment for confounders (sex, smoking status, region,  
9  
10 duration of education, and annual family income), to evaluate the relationships of  
11  
12 hypertension prevalence with periodontal status or parameters. The level of statistical  
13  
14 significance was set at  $p < 0.05$ .  
15  
16  
17  
18  
19  
20  
21

## 22 RESULTS

23  
24 The participants were randomly selected from 31 provinces, autonomous regions, and  
25  
26 municipalities in mainland China. In total, data from 13,195 individuals were included  
27  
28 in the analysis; invalid data from five participants and data from 264 edentulous patients  
29  
30 were excluded. The mean individual age was  $56.43 \pm 12.40$  years. The sample  
31  
32 consisted of 6,575 men (49.83%) and 6,620 women (50.17%). There were 3,470 non-  
33  
34 smokers (26.30%), 8,405 current smokers (63.71%), and 1,318 former smokers  
35  
36 (9.99%). Hypertension was present and absent in 3,154 (23.90%) and 10,041 (76.10%)  
37  
38 participants, respectively.  
39  
40  
41  
42  
43  
44  
45  
46  
47

### 48 *Differences in periodontal status between hypertensive and normotensive* 49 50 *participants decreased with age*

51  
52 Table 1 and S1 present the distributions of periodontal status according to age and  
53  
54 gender in participants with and without hypertension.  
55  
56  
57  
58  
59  
60

1  
2  
3  
4 Significantly greater proportions of hypertensive participants had stages I-IV  
5  
6 periodontitis (70.23% vs. 61.51%,  $p < 0.001$ ) and severe periodontitis (stages III-IV,  
7  
8 41.34% vs. 27.99%,  $p < 0.001$ ), compared with normotensive participants. Stratified  
9  
10 analysis by gender showed that the prevalence of periodontitis (stage I-IV) was  
11  
12 significantly greater in hypertensive participants than in normotensive participants in  
13  
14 females (66.48 % vs. 55.92 %,  $p < 0.001$ ) but not in males (74.09 % vs. 67.10%,  $p =$   
15  
16 0.057). Severe periodontitis (stage III and stage IV) was more common in hypertensive  
17  
18 participants than in normotensive participants both in males (46.13% vs. 32.64%,  $p <$   
19  
20 0.001) and females (36.60 % vs. 23.35 %,  $p < 0.001$ ). Stratified analysis according to  
21  
22 age showed that the prevalence of periodontitis (stage I-IV) was significantly greater in  
23  
24 hypertensive participants than in normotensive participants among individuals aged 35-  
25  
26 44 years (52.33% vs. 59.06%,  $p = 0.030$ ), 55-64 years (72.61% vs. 69.19%,  $p = 0.023$ ),  
27  
28 and 65-74 years (70.23% vs. 66.35%,  $p = 0.009$ ). Severe periodontitis (stage III and  
29  
30 stage IV) was more common in hypertensive participants than in normotensive  
31  
32 participants among individuals aged 35-44 years (18.12% vs. 10.09%,  $p < 0.001$ ) and  
33  
34 55-64 years (40.12% vs. 36.77%,  $p = 0.035$ ), but not among individuals aged 65-74  
35  
36 years (46.40% vs. 45.14%,  $p = 0.429$ ). Therefore, differences in periodontal status  
37  
38 between hypertensive and normotensive participants decreased with age (Table 1).  
39  
40  
41  
42  
43  
44  
45  
46  
47  
48  
49  
50  
51  
52

53 Table 1. Comparison of distribution of periodontal status according to the 2017  
54  
55 classification by age/gender groups between hypertensive and normotensive subjects.  
56  
57  
58  
59  
60

|           |            | NT   |      |           | HT  |      |           |
|-----------|------------|------|------|-----------|-----|------|-----------|
|           |            | N    | %    | 95% CI    | N   | %    | 95% CI    |
| Male      | Health     | 598  | 11.9 | 11.1~12.9 | 159 | 10.2 | 8.7~11.7  |
|           | Gingivitis | 1051 | 21.0 | 19.9~22.1 | 246 | 15.7 | 14.0~17.6 |
|           | Stage I    | 844  | 16.8 | 15.8~17.9 | 171 | 10.9 | 9.5~12.6  |
|           | Stage II   | 883  | 17.6 | 16.6~18.7 | 266 | 17.0 | 15.2~18.9 |
|           | Stage III  | 906  | 18.1 | 17.0~19.2 | 357 | 22.8 | 20.8~25.0 |
|           | Stage IV   | 730  | 14.6 | 13.6~15.6 | 364 | 23.3 | 21.2~25.4 |
| Female    | Health     | 755  | 15.0 | 14.1~16.0 | 179 | 11.2 | 9.8~12.9  |
|           | Gingivitis | 1461 | 29.1 | 27.8~30.3 | 355 | 22.3 | 20.3~24.4 |
|           | Stage I    | 867  | 17.2 | 16.2~18.3 | 199 | 12.5 | 10.9~14.2 |
|           | Stage II   | 770  | 15.3 | 14.3~16.3 | 277 | 17.4 | 15.6~19.3 |
|           | Stage III  | 588  | 11.7 | 10.8~12.6 | 260 | 16.3 | 14.6~18.2 |
|           | Stage IV   | 586  | 11.7 | 10.8~12.6 | 323 | 20.3 | 18.4~22.3 |
| 35-45 yrs | Health     | 658  | 15.9 | 14.8~17.1 | 40  | 14.5 | 10.7~19.0 |
|           | Gingivitis | 1312 | 31.7 | 30.3~33.2 | 73  | 26.4 | 21.5~31.9 |
|           | Stage I    | 1134 | 27.4 | 26.1~28.8 | 69  | 25.0 | 20.2~30.4 |
|           | Stage II   | 612  | 14.8 | 13.7~15.9 | 44  | 15.9 | 12.0~20.6 |
|           | Stage III  | 360  | 8.7  | 7.9~9.6   | 40  | 14.5 | 10.7~19.0 |
|           | Stage IV   | 57   | 1.4  | 1.1~1.8   | 10  | 3.6  | 1.9~6.3   |
| 55-65 yrs | Health     | 347  | 10.6 | 9.6~11.7  | 116 | 9.0  | 7.5~10.6  |
|           | Gingivitis | 661  | 20.2 | 18.9~21.6 | 239 | 18.4 | 16.4~20.6 |
|           | Stage I    | 403  | 12.3 | 11.2~13.5 | 174 | 13.4 | 11.7~15.4 |
|           | Stage II   | 658  | 20.1 | 18.8~21.5 | 247 | 19.1 | 17.0~21.3 |
|           | Stage III  | 659  | 20.1 | 18.8~21.5 | 273 | 21.1 | 18.9~23.3 |
|           | Stage IV   | 544  | 16.6 | 15.4~17.9 | 247 | 19.1 | 17.0~21.3 |
| 65-75 yrs | Health     | 348  | 13.2 | 12.0~14.5 | 182 | 11.5 | 10.0~13.1 |
|           | Gingivitis | 539  | 20.4 | 18.9~22.0 | 289 | 18.3 | 16.4~20.2 |
|           | Stage I    | 175  | 6.6  | 5.7~7.6   | 126 | 8.0  | 6.7~9.4   |
|           | Stage II   | 384  | 14.6 | 13.3~16.0 | 251 | 15.9 | 14.1~17.7 |
|           | Stage III  | 475  | 18.0 | 16.6~19.5 | 304 | 19.2 | 17.3~21.2 |
|           | Stage IV   | 715  | 27.1 | 25.5~28.8 | 430 | 27.2 | 25.0~29.4 |
| Total     | Health     | 1353 | 13.5 | 12.8~14.2 | 338 | 10.7 | 9.7~11.8  |
|           | Gingivitis | 2512 | 25.0 | 24.2~25.9 | 601 | 19.1 | 17.7~20.5 |
|           | Stage I    | 1712 | 17.1 | 16.3~17.8 | 369 | 11.7 | 10.6~12.9 |
|           | Stage II   | 1654 | 16.5 | 15.8~17.2 | 542 | 17.2 | 15.9~18.5 |

|           |      |      |           |     |      |           |
|-----------|------|------|-----------|-----|------|-----------|
| Stage III | 1494 | 14.9 | 14.2~15.6 | 617 | 19.6 | 18.2~21.0 |
| Stage IV  | 1316 | 13.1 | 12.5~13.8 | 687 | 21.8 | 20.4~23.2 |

HT = Hypertension; NT = Normotension.

Table S1 showed the distribution of periodontal status stratified according to smoking status. Periodontitis (stage I-IV) was more common in hypertensive participants than in normotensive participants among current smokers (76.16% vs. 68.15%,  $p < 0.001$ ) and non-smokers (67.25% vs. 57.41%,  $p < 0.001$ ), but not among former smokers (73.59% vs. 70.58%,  $p = 0.270$ ). Severe periodontitis (stage III and stage IV) was significantly more common in hypertensive participants than in normotensive participants among non-smokers (48.45% vs. 34.67%,  $p < 0.001$ ), current smokers (36.82% vs. 23.75%,  $p < 0.001$ ), and former smokers (50.26% vs 37.93%,  $p < 0.001$ ).

***Periodontal status was significantly worse in hypertensive participants than in normotensive participants***

Tables 2 and 3 present comparisons of periodontal parameters between hypertensive and normotensive participants. Compared with normotensive participants, hypertensive participants had significantly greater proportions of teeth with BOP (57.71% vs. 53.12%), PD  $\geq$  4 mm (22.11% vs. 16.29%), PD  $\geq$  6 mm (2.07% vs. 1.22%), AL  $\geq$  4 mm (28.86% vs. 20.56%), AL  $\geq$  6 mm (8.44% vs. 5.54%), and AL  $\geq$  9 mm (1.72% vs. 1.18%). Differences in periodontal parameters between hypertensive and normotensive participants decreased with age. The differences in periodontal parameters between hypertensive and normotensive participants were similar among



current smokers, former smokers, and non-smokers. Difference in the mean prevalence of periodontal pocket ( $PD \geq 4$  mm) were consistent in the stratified analysis.

Compared with normotensive participants, hypertensive participants had significantly greater proportions of teeth with  $PD \geq 4$  mm (4.45 vs. 3.46),  $PD \geq 6$  mm (0.37 vs. 0.22),  $AL \geq 4$  mm (1.18 vs. 0.81), and  $AL \geq 6$  mm (0.2 vs. 0.12). The mean number of BOP-positive teeth did not significant differ between hypertensive and normotensive participants (12.43 vs. 12.33). The mean number of teeth showed a distribution pattern similar to the distribution patterns of various periodontal parameters. The difference in the mean number of teeth between hypertensive and normotensive participants decreased with age. Furthermore, differences in the prevalences of teeth with  $PD \geq 4$  mm and deep PD sites were consistent in the stratified analysis.

Table 2. Comparison of percentage of teeth affected by age groups and smoking status.

|             |                | PTA  |              | NT    |             | HT    |  |
|-------------|----------------|------|--------------|-------|-------------|-------|--|
|             |                | Mean | 95% CI       | Mean  | 95% CI      | p*    |  |
| 35-45 years | BOP+           | 46.5 | 45.41~47.55. | 50.32 | 45.92~54.72 | 0.096 |  |
|             | $PD \geq 4$ mm | 10.5 | 9.90~11.05   | 15.83 | 12.86~18.80 | 0.001 |  |
|             | $PD \geq 6$ mm | 0.5  | 0.40~0.59    | 1.09  | 0.56~1.63   | 0.031 |  |
|             | $AL \geq 4$ mm | 6    | 5.55~6.41    | 10.14 | 7.85~12.43  | 0.001 |  |
|             | $AL \geq 6$ mm | 0.8  | 0.69~0.95    | 1.62  | 0.82~2.42   | 0.052 |  |
| 55-65 years | BOP+           | 52.5 | 51.30~53.72  | 54.03 | 52.11~55.96 | 0.188 |  |
|             | $PD \geq 4$ mm | 17.9 | 17.11~18.76  | 20.3  | 18.92~21.68 | 0.004 |  |
|             | $PD \geq 6$ mm | 1.4  | 1.21~1.65    | 1.9   | 1.55~2.24   | 0.024 |  |
|             | $AL \geq 4$ mm | 22.1 | 21.16~22.95  | 21.53 | 20.15~22.92 | 0.543 |  |
|             | $AL \geq 6$ mm | 5.3  | 4.90~5.78    | 5.49  | 4.79~6.18   | 0.722 |  |
| 65-75 years | BOP+           | 49.3 | 47.91~50.59  | 50.84 | 49.09~52.58 | 0.157 |  |
|             | $PD \geq 4$ mm | 17.4 | 16.45~18.28  | 19.6  | 18.39~20.81 | 0.004 |  |
|             | $PD \geq 6$ mm | 1.5  | 1.29~1.81    | 1.84  | 1.49~2.19   | 0.185 |  |
|             | $AL \geq 4$ mm | 28.7 | 27.59~29.78  | 27.62 | 26.25~28.99 | 0.240 |  |

|                |         |         |      |             |       |             |       |
|----------------|---------|---------|------|-------------|-------|-------------|-------|
|                |         | AL≥ 6mm | 8.9  | 8.28~9.61   | 8.29  | 7.47~9.11   | 0.226 |
| Current smoker | BOP+    |         | 49.6 | 46.77~52.42 | 49.89 | 45.99~53.79 | 0.311 |
|                | PD≥ 4mm |         | 21.4 | 19.36~23.52 | 22.94 | 20.16~25.72 | 0.000 |
|                | PD≥ 6mm |         | 2.2  | 1.53~2.80   | 2.09  | 1.34~2.84   | 0.006 |
|                | AL≥ 4mm |         | 36.3 | 33.86~38.78 | 33.54 | 30.24~36.84 | 0.000 |
|                | AL≥ 6mm |         | 13.1 | 11.38~14.75 | 11.38 | 9.26~13.50  | 0.001 |
| Non-smoker     | BOP+    |         | 48.9 | 47.22~50.57 | 51.56 | 49.42~53.69 | 0.000 |
|                | PD≥ 4mm |         | 15.4 | 14.30~16.47 | 17.91 | 16.49~19.33 | 0.000 |
|                | PD≥ 6mm |         | 1.1  | 0.89~1.40   | 1.66  | 1.27~2.05   | 0.000 |
|                | AL≥ 4mm |         | 25.1 | 23.79~26.41 | 24.67 | 23.10~26.23 | 0.000 |
|                | AL≥ 6mm |         | 7.2  | 6.44~7.92   | 6.60  | 5.71~7.50   | 0.000 |
| Former smoker  | BOP+    |         | 50.2 | 46.54~53.82 | 48.84 | 44.03~53.65 | 0.603 |
|                | PD≥ 4mm |         | 18.7 | 16.23~21.21 | 22.62 | 18.90~26.34 | 0.000 |
|                | PD≥ 6mm |         | 2.2  | 1.32~3.13   | 2.31  | 1.07~3.56   | 0.126 |
|                | AL≥ 4mm |         | 30.7 | 27.81~33.60 | 32.77 | 28.63~36.92 | 0.001 |
|                | AL≥ 6mm |         | 9.3  | 7.63~10.97  | 11.66 | 9.01~14.30  | 0.002 |
| Total          | BOP+    |         | 0.0  | 0.00~0.00   | 0.00  | 0.00~0.00   | 0.000 |
|                | PD≥ 4mm |         | 0.0  | 0.00~0.00   | 0.00  | 0.00~0.00   | 0.000 |
|                | PD≥ 6mm |         | 0.0  | 0.00~0.00   | 0.00  | 0.00~0.00   | 0.000 |
|                | AL≥ 4mm |         | 0.0  | 0.00~0.00   | 0.00  | 0.00~0.00   | 0.000 |
|                | AL≥ 6mm |         | 0.0  | 0.00~0.00   | 0.00  | 0.00~0.00   | 0.001 |

AL= attachment loss; BOP = bleeding on probing; HT = Hypertension;

NT = Normotension; PD = probing depth; PTA = Percentage of teeth affected;

\* significant difference by Student's t test.

Table 3. Number of teeth affected by age groups and smoking status.

|             |         | NTA   |             | NT    |             | HT    |  |
|-------------|---------|-------|-------------|-------|-------------|-------|--|
|             |         | Mean  | 95% CI      | Mean  | 95% CI      | p*    |  |
| 35-45 years | BOP+    | 12.69 | 12.40~12.99 | 13.61 | 12.42~14.80 | 0.143 |  |
|             | PD≥ 4mm | 2.83  | 2.68~2.99   | 4.19  | 3.40~4.98   | 0.001 |  |
|             | PD≥ 6mm | 0.13  | 0.10~0.15   | 0.27  | 0.14~0.40   | 0.036 |  |
|             | AL≥ 4mm | 1.58  | 1.47~1.70   | 2.58  | 2.00~3.16   | 0.001 |  |

|                |         |       |             |       |             |       |
|----------------|---------|-------|-------------|-------|-------------|-------|
|                | AL≥ 6mm | 0.20  | 0.17~0.24   | 0.38  | 0.21~0.55   | 0.049 |
| 55-65 years    | BOP+    | 13.01 | 12.69~13.33 | 13.37 | 12.86~13.88 | 0.241 |
|                | PD≥ 4mm | 4.21  | 4.02~4.40   | 4.76  | 4.43~5.08   | 0.005 |
|                | PD≥ 6mm | 0.28  | 0.24~0.32   | 0.41  | 0.34~0.49   | 0.003 |
|                | AL≥ 4mm | 5.03  | 4.82~5.23   | 4.80  | 4.49~5.11   | 0.222 |
|                | AL≥ 6mm | 1.07  | 0.99~1.15   | 1.08  | 0.95~1.21   | 0.914 |
| 65-75 years    | BOP+    | 10.92 | 10.59~11.26 | 11.47 | 11.03~11.91 | 0.051 |
|                | PD≥ 4mm | 3.52  | 3.33~3.72   | 4.25  | 3.98~4.52   | 0.000 |
|                | PD≥ 6mm | 0.27  | 0.23~0.31   | 0.36  | 0.29~0.42   | 0.042 |
|                | AL≥ 4mm | 5.65  | 5.43~5.88   | 5.60  | 5.31~5.88   | 0.752 |
|                | AL≥ 6mm | 1.46  | 1.36~1.56   | 1.40  | 1.27~1.53   | 0.508 |
| Current smoker | BOP+    | 12.30 | 11.93~12.67 | 12.09 | 0.33~0.42   | 0.583 |
|                | PD≥ 4mm | 4.59  | 4.36~4.82   | 5.49  | 594.42~0.00 | 0.001 |
|                | PD≥ 6mm | 0.31  | 0.27~0.35   | 0.50  | 61.18~0.00  | 0.001 |
|                | AL≥ 4mm | 4.86  | 4.62~5.09   | 6.13  | 658.63~0.00 | 0.000 |
|                | AL≥ 6mm | 1.19  | 1.09~1.29   | 1.59  | 179.14~0.00 | 0.001 |
| Non-smoker     | BOP+    | 12.29 | 12.06~12.51 | 12.62 | 12.22~13.02 | 0.159 |
|                | PD≥ 4mm | 2.89  | 2.78~3.01   | 3.91  | 3.68~4.15   | 0.000 |
|                | PD≥ 6mm | 0.16  | 0.14~0.18   | 0.29  | 0.24~0.34   | 0.000 |
|                | AL≥ 4mm | 3.10  | 2.98~3.22   | 4.38  | 4.15~4.61   | 0.000 |
|                | AL≥ 6mm | 0.60  | 0.56~0.64   | 0.92  | 0.83~1.01   | 0.000 |
| Former smoker  | BOP+    | 12.72 | 12.13~13.32 | 12.21 | 11.28~13.14 | 0.359 |
|                | PD≥ 4mm | 4.12  | 3.76~4.48   | 5.14  | 4.50~5.78   | 0.006 |
|                | PD≥ 6mm | 0.36  | 0.27~0.44   | 0.53  | 0.37~0.69   | 0.069 |
|                | AL≥ 4mm | 5.29  | 4.90~5.68   | 5.94  | 5.32~6.55   | 0.081 |
|                | AL≥ 6mm | 1.18  | 1.02~1.33   | 1.66  | 1.36~1.96   | 0.005 |
| Total          | BOP+    | 12.33 | 12.15~12.51 | 12.44 | 12.42~14.80 | 0.574 |
|                | PD≥ 4mm | 3.46  | 3.36~3.57   | 4.45  | 3.40~4.98   | 0.000 |
|                | PD≥ 6mm | 0.22  | 0.20~0.24   | 0.37  | 0.14~0.40   | 0.000 |
|                | AL≥ 4mm | 3.77  | 3.67~3.88   | 5.00  | 2.00~3.16   | 0.000 |
|                | AL≥ 6mm | 0.81  | 0.77~0.85   | 1.18  | 0.21~0.55   | 0.000 |

AL= attachment loss; BOP = bleeding on probing; HT = Hypertension;

NT = Normotension; NTA = Number of teeth affected; PD = probing depth;

\* significant difference by Student's t test.

### *Hypertension prevalence increased with periodontitis severity*

Multivariate regression analysis was performed to evaluate the relationship between hypertension and age stratified according to periodontal status, after adjustments for sex, smoking status, region, duration of education, and annual family income (Table 4). Compared with participants who did not have periodontitis, participants with stages III and IV periodontitis had a significant greater risk of hypertension (odds ratio [OR] = 1.698, 95% confidence interval [CI] = 1.45-1.99,  $p < 0.000$ ). However, the difference between participants with stages I and II periodontitis and participants without periodontitis was not statistically significant (OR = 1.028, 95% CI = 0.88-1.20,  $p = 0.717$ ). Therefore, hypertension prevalence increased with periodontitis severity. Notably, the OR for participants with stages III and IV periodontitis decreased with age; it was not statistically significant in participants aged 65-74 years (Table 4).

Table 4. Relationships between blood pressure (hypertension vs. normotension) and periodontal status (compared with non-periodontitis) according to the 2017 classification analyzed by logistic regressions with adjustment for gender, smoking status, region, years of education, and annual family income

| Age group   | Periodontal status*                         | OR    | 95% CI    | p     |
|-------------|---------------------------------------------|-------|-----------|-------|
| 35-45 years | Periodontitis (stage III & IV) <sup>#</sup> | 1.617 | 1.00~2.61 | 0.050 |
|             | Periodontitis (stage I & II) <sup>#</sup>   | 0.966 | 0.65~1.43 | 0.863 |
| 55-65 years | Periodontitis (stage III & IV) <sup>#</sup> | 1.402 | 1.07~1.84 | 0.015 |
|             | Periodontitis (stage I & II) <sup>#</sup>   | 1.301 | 1.00~1.69 | 0.051 |

|             |                                             |       |           |       |
|-------------|---------------------------------------------|-------|-----------|-------|
| 65-75 years | Periodontitis (stage III & IV) <sup>#</sup> | 1.205 | 0.96~1.42 | 0.113 |
|             | Periodontitis (stage I & II) <sup>#</sup>   | 1.121 | 0.96~1.42 | 0.336 |
| Total       | Periodontitis (stage III & IV) <sup>#</sup> | 1.698 | 1.45~1.99 | 0.000 |
|             | Periodontitis (stage I & II) <sup>#</sup>   | 1.028 | 0.88~1.20 | 0.717 |

\* According to the 2017 World Workshop on the Classification of Periodontal and Per-Implant Diseases and Conditions <sup>17</sup>.

### ***Relationships of hypertension with periodontal parameters***

Table 5 and Table 6 present the multivariate regression analyses of the relationships of hypertension with periodontal parameters, after adjustments for sex, smoking status, region, duration of education, and annual family income. Hypertension prevalence increased with increases in the proportions of teeth with BOP (OR = 1.204, 95% CI = 1.05-1.38, p = 0.006), PD  $\geq$  4 mm (OR = 1.733, 95% CI = 1.43-2.10, p < 0.001), and PD  $\geq$  6 mm (OR = 2.443, 95% CI = 1.19-5.03, p = 0.015), but it decreased with increases in the proportions of teeth with AL  $\geq$  4 mm (OR = 0.874, 95% CI = 0.73-1.05, p = 0.155) and AL  $\geq$  6 mm (OR = 0.743, 95% CI = 0.53-1.04, p = 0.083). There were significant positive associations of hypertension with the number of teeth with BOP (OR = 1.008, 95% CI = 1.00-1.01, p = 0.001), PD  $\geq$  4 mm (OR = 1.029, 95% CI = 1.02-1.04, p < 0.000), and PD  $\geq$  6mm (OR = 1.071, 95% CI = 1.03-1.11, p < 0.001). There were statistically insignificant negative associations of the presence of hypertension with the proportions of teeth with AL  $\geq$  4 mm and AL  $\geq$  6 mm (Table 6).

Table 5. Relationships between blood pressure (hypertension vs. normotension) and percentage of teeth affected with different threshold of periodontal parameters analyzed by logistic regressions with adjustment for age, gender, smoking status, region, years of education, and annual family income.

| PTA           | OR    | 95% CI    | p     |
|---------------|-------|-----------|-------|
| BOP+          | 1.204 | 1.05~1.38 | 0.006 |
| PD $\geq$ 4mm | 1.733 | 1.43~2.10 | 0.000 |
| PD $\geq$ 6mm | 2.443 | 1.19~5.03 | 0.015 |
| AL $\geq$ 4mm | 0.874 | 0.73~1.05 | 0.155 |
| AL $\geq$ 6mm | 0.743 | 0.53~1.04 | 0.083 |

AL= attachment loss; BOP = bleeding on probing; PD = probing depth; PTA = mean percentage of teeth affected per individual.

Table 6. Relationships between blood pressure (hypertension vs. normotension) and percentage of teeth affected with different threshold of periodontal parameters analyzed by logistic regressions with adjustment for age, gender, smoking status, region, years of education, and annual family income.

| NTA           | OR    | 95% CI    | p     |
|---------------|-------|-----------|-------|
| BOP+          | 1.008 | 1.00~1.01 | 0.001 |
| PD $\geq$ 4mm | 1.029 | 1.02~1.04 | 0.000 |
| PD $\geq$ 6mm | 1.071 | 1.03~1.11 | 0.000 |
| AL $\geq$ 4mm | 0.997 | 0.99~1.01 | 0.507 |
| AL $\geq$ 6mm | 0.987 | 0.97~1.01 | 0.217 |

AL= attachment loss; BOP = bleeding on probing; NTA = mean number of teeth affected per individual; PD = probing depth.

***Significantly more teeth were missing in hypertensive participants than in normotensive participants***

Table S1 presents a comparison of the number of missing teeth between participants

1  
2  
3  
4 with and without hypertension. Significantly more teeth were missing in hypertensive  
5  
6 participants than in normotensive participants (4.36 vs. 2.94 teeth). The difference in  
7  
8 the number of missing teeth between hypertensive and normotensive participants  
9  
10 decreased with age. Analysis of the relationship according to smoking status showed  
11  
12 that hypertension prevalence increased and then decreased with increases in the number  
13  
14 of missing teeth.  
15  
16  
17  
18  
19  
20  
21

## 22 **DISCUSSION**

23  
24 Based on data from the Fourth National Oral Health Survey of China, periodontitis is  
25  
26 significantly and strongly associated with hypertension among Chinese adults,  
27  
28 independent of the effects of age, sex, and smoking. The association between  
29  
30 periodontitis and hypertension reported in this study is in agreement with that recently  
31  
32 reported reviews<sup>18,19</sup>. This association between periodontitis and hypertension has  
33  
34 considerable importance<sup>20</sup>.  
35  
36  
37  
38  
39

40 In recent systemic reviews analyzing the association between periodontitis and  
41  
42 hypertension, the included studies had been conducted in different countries across Asia,  
43  
44 Europe, America, and Africa, lacking the large-scale data from China<sup>18,19</sup>. In this study,  
45  
46 we used data from a large-scale national survey in which participants were  
47  
48 representative of the Chinese population. Besides, the lack of consistent measures of  
49  
50 case definition and severity of periodontitis in the retrieved studies did not allow for a  
51  
52 relevant analysis of extent and severity of periodontitis with hypertension. In the  
53  
54 present study, periodontitis was diagnosed in accordance with the classification  
55  
56  
57  
58  
59  
60

1  
2  
3  
4 proposed at the 2017 World Workshop. The association of hypertension with  
5  
6 periodontitis was assessed according to age and smoking status to minimize errors and  
7  
8 the effects of confounding factors. Periodontitis was associated with a increase  
9  
10 prevalence of hypertension among Chinese adults, independent of known confounders.  
11  
12 In most of the studies, periodontal status was clinically evaluated through PD and/or  
13  
14 clinical attachment level measurement <sup>18,19</sup>. Nevertheless, several definitions of  
15  
16 periodontal diseases have been used across studies and only a few have distinguished  
17  
18 severe forms of periodontitis. In the present study, periodontitis severity was defined  
19  
20 using the 2017 World Workshop on the Classification of Periodontal and Peri-Implant  
21  
22 Diseases and Conditions. Participants with severe periodontal disease (stages III and  
23  
24 IV periodontitis) had a greater risk of hypertension compared with participants who had  
25  
26 mild or no periodontal disease.  
27  
28  
29  
30  
31  
32  
33  
34

35 Hypertension prevalence increased with periodontitis severity, particularly among  
36  
37 young participants (35-44 years). Therefore, participants with risk factors, particularly  
38  
39 young adults, should engage in healthy lifestyle habits to improve their oral health.  
40  
41 Accordingly, there is a need to improve the education and awareness of dental treatment  
42  
43 and preventive management among individuals at risk for hypertension, particularly in  
44  
45 younger population. Periodontitis and hypertension are chronic diseases; therefore,  
46  
47 substantial exposure time may be necessary for their development. The exposure time  
48  
49 to risk factors may be considerably shorter in younger individuals than that in older  
50  
51 individuals. The influence of the longer exposure time to the common risk factors for  
52  
53 periodontitis and hypertension in older individuals may mask the effects of  
54  
55  
56  
57  
58  
59  
60



1  
2  
3  
4 periodontitis on the development of hypertension. When the confounding effects of the  
5  
6 risk factors were removed, a link between periodontitis and hypertension was identified.  
7

8  
9 Therefore, severe periodontitis may have a greater role in the development of  
10  
11 hypertension among younger individuals than among older individuals. The association  
12  
13 of periodontitis with hypertension was also present in never smokers and former  
14  
15 smokers, who had less exposure to common risk factors. The greater susceptibility to  
16  
17 hypertension among young individuals with severe periodontitis may be attributed to  
18  
19 periodontal inflammation.  
20  
21  
22  
23

24  
25 This study evaluated the association between periodontal status and hypertension risk  
26  
27 among young and older adults. Hypertension prevalence increased with periodontitis  
28  
29 severity, which was most prominent in individuals aged 35-44 years. Adult aged < 65  
30  
31 years with hypertension had significantly greater risks of stages III and IV periodontitis,  
32  
33 compared with individuals who did not have hypertension. Therefore, healthcare  
34  
35 providers should carefully monitor oral health status in their patients to prevent  
36  
37 hypertension, particularly among adults; they should conduct regular oral examinations  
38  
39 and engage in periodontal disease management.  
40  
41  
42  
43  
44

45  
46 The association between periodontitis and hypertension was also present in participants  
47  
48 who had a greater proportion of teeth with BOP or deep periodontal pockets. The  
49  
50 findings suggest that severe periodontal inflammation, as evidenced by the depth of the  
51  
52 inflamed periodontal pocket and the number of bleeding sites, is associated with  
53  
54 hypertension. In particular, the presence of BOP indicates acute inflammation, which  
55  
56 may lead to systemic effects and subsequent hypertension. The association of  
57  
58  
59  
60

1  
2  
3  
4 inflammation (i.e., PD) with hypertension suggests that persistent, long-term  
5  
6 inflammation may also underlie this relationship. Compared with AL, PD seems to be  
7  
8 more closely related to hypertension. For example, significant differences of the  
9  
10 percentages/numbers of PD  $\geq$  4mm and 6mm in 55-64 years were seen between  
11  
12 hypertensive and normotensive individuals, but not in the percentages/numbers of AL  
13  
14  $\geq$ 4mm and 6mm (Table 2 and 3). This is because AL is more related to periodontal  
15  
16 attachment damage, while PD is more related to the existing periodontal inflammation.  
17  
18 This also indicates that the correlation between periodontitis and hypertension may be  
19  
20 related to the increase of systemic inflammation. Our study adds to the existing  
21  
22 literature concerning oral health parameters associated with systemic outcomes <sup>21, 22</sup>.  
23  
24 BOP and PD are the most appropriate clinical measures when the outcome of interest  
25  
26 is an acute disease, whereas AL is more strongly correlated with chronic systemic  
27  
28 conditions <sup>21</sup>. Our findings of an association between hypertension and the severity of  
29  
30 periodontal inflammation (BOP and PD) are consistent with the results of previous  
31  
32 studies <sup>12, 18</sup>. Although the causality of the observed association remains unclear, several  
33  
34 hypotheses have been proposed, including endothelial dysfunction, oxidative stress,  
35  
36 worsening of systemic inflammation in response to bacteraemia, and dissemination of  
37  
38 inflammatory mediators from periodontal pockets, particularly BOP <sup>23</sup>. This association  
39  
40 is further supported by the results of a randomised clinical trial that showed short-term  
41  
42 benefits of periodontal therapy on hypertension <sup>24</sup>. Additionally, a recent study  
43  
44 identified oral pathogens associated with high or uncontrolled BP, which supports our  
45  
46 findings <sup>25</sup>.  
47  
48  
49  
50  
51  
52  
53  
54  
55  
56  
57  
58  
59  
60

1  
2  
3  
4 Our finding of an association between the number of missing teeth and hypertension is  
5  
6 consistent with the results reported by Taguchi et al <sup>26</sup>. Missing teeth are indicative of  
7  
8 poor oral health; they presumably were lost because of caries and periodontal disease.  
9  
10 Thus, the absence of several teeth suggests the presence of severe periodontal disease,  
11  
12 caries, or other oral health problems; these may have contributed to the increased risk  
13  
14 of hypertension. This association was strongest in younger adults. There were no  
15  
16 residual confounding effects of age that may have affected our study results. Because  
17  
18 of the high prevalence of hypertension in Chinese adults, further studies are needed to  
19  
20 clarify the association between periodontitis and hypertension. Moreover, attention is  
21  
22 needed concerning the prevention and treatment of periodontitis in the general  
23  
24 population.  
25  
26  
27  
28  
29  
30  
31

32 There is minimal knowledge concerning the natural history of the association between  
33  
34 periodontal disease and hypertension <sup>27-31</sup>. A significant linear trend was observed  
35  
36 between the severity of periodontal disease and hypertension in a cross-sectional study  
37  
38 of 3,352 patients with periodontal disease and 902 controls <sup>29</sup>. A recent prospective  
39  
40 cohort study of Japanese individuals demonstrated an increased incidence of  
41  
42 hypertension among participants with periodontal pockets  $\geq 4$  mm at baseline <sup>30</sup>. Our  
43  
44 findings are consistent with the results in a similar study of 6,617 men and 7,377 women  
45  
46 who underwent dental examinations as part of the NHANES III in the USA <sup>32</sup>. In the  
47  
48 present study, after multivariate adjustment, gingival bleeding (BOP) was associated  
49  
50 with an increased risk of hypertension, whereas periodontitis severity (defined using  
51  
52 the 2017 World Workshop on the Classification of Periodontal and Peri-Implant  
53  
54  
55  
56  
57  
58  
59  
60

1  
2  
3  
4 Diseases and Conditions) and PD were positively associated with hypertension.  
5  
6 Participants with severe periodontal disease (stages III and IV periodontitis) had a  
7  
8 greater risk of hypertension compared with participants who had mild or no periodontal  
9  
10 disease. Furthermore, there was a threshold relationship between severe periodontal  
11  
12 disease and hypertension.  
13  
14  
15

16  
17 To our knowledge, the present study is one of few concerning the association between  
18  
19 periodontal disease and hypertension in a large sample of Chinese adults, after  
20  
21 adjustments for potential confounders. We evaluated several clinical measures of  
22  
23 periodontal disease that allowed analysis of the relationships between various aspects  
24  
25 of periodontal disease and hypertension. We found consistent associations between PD  
26  
27 and hypertension. PD may be indicative of poor oral health and periodontal  
28  
29 inflammation. It was positively associated with hypertension, suggesting a link between  
30  
31 inflammation and hypertension.  
32  
33  
34  
35  
36

37  
38 The main limitation of the present study was that hypertension was self-report and not  
39  
40 based on blood pressure measurements, which is inherent to any epidemiological cohort  
41  
42 study. However, field measurements of blood pressure are regarded as validated tools,  
43  
44 have been used in previous studies <sup>21, 23</sup>, and are considered useful for the analysis of  
45  
46 large samples. Furthermore, although recall and reporting bias could not be excluded,  
47  
48 the results largely reflect real-world clinical practice. First, the self-reported diagnosis  
49  
50 was based on a face-to-face interview to ensure the validity and accuracy of the  
51  
52 information. Second, the reliability of the study results is supported by data from the  
53  
54 China Hypertension Survey (2012-2015) <sup>33</sup>, which showed an overall hypertension  
55  
56  
57  
58  
59  
60

1  
2  
3  
4 prevalence of 23.2% in the Chinese adult population; this prevalence is similar to the  
5  
6 prevalence observed in our study (23.9%).  
7

8  
9 In summary, our epidemiological analysis revealed an association between  
10  
11 periodontitis and hypertension. We collected high-quality, large-scale clinical data  
12  
13 related to periodontal disease and hypertension. We also collected detailed information  
14  
15 regarding potential confounders, including variables that reflect health behavior (e.g.,  
16  
17 flossing). However, there was no strong evidence of a causal relationship. Future  
18  
19 studies should be conducted to improve the understanding of the underlying  
20  
21 mechanisms and interactions between periodontitis and hypertension, which will  
22  
23 further strengthen collaborations between the dental and medical communities.  
24  
25 Preventive measures for periodontal disease in oral health promotion programs should  
26  
27 be emphasised to improve systemic health outcomes.  
28  
29  
30  
31  
32  
33

### 34 35 36 37 **Contributorship statement**

38  
39 YZ is the major contributor in writing the manuscript and participates in data analysis  
40  
41 and collation. JJ participates in data analysis and collation. WJ participates in writing  
42  
43 the manuscript. XF, BT, DH, HL, BW, CW, SZ, XL, WR, WW, XW, and YS conceive  
44  
45 the study design and draft the protocol. HM conceives the study design, drafts the  
46  
47 protocol, and revise the manuscript. All authors read and approved the final manuscript.  
48  
49  
50  
51  
52  
53  
54

### 55 56 **Competing interests**

57  
58 The authors declare that they have no conflict of interests.  
59  
60

## Funding

This study was supported by "the Public Science and Technology Research Funds Project (2015) - the Fourth National Oral Health Survey (201502002)" and Peking University School and Hospital of Stomatology (PKUSS20180205).

## Data sharing statement

Dataset available from the Fourth National Oral Health Survey of China (2015-2016).

## Ethics approval

The study protocol was approved by the Ethics Committee of the Chinese Stomatological Association (approval no.: 2014-003). Written informed consent was obtained from all participants. This study was performed in accordance with the 2013 revision of the Declaration of Helsinki.

## Reference

1. Williams B, Mancia G, Spiering W, Agabiti Rosei E, Azizi M, Burnier M, et al. 2018 ESC/ESH Guidelines for the management of arterial hypertension: The Task Force for the management of arterial hypertension of the European Society of Cardiology and the European Society of Hypertension: The Task Force for the management of arterial hypertension of the European Society of Cardiology and the European Society of Hypertension. *J Hypertens* 2018; 36 (10): 1953-2041. doi: 10.1097/HJH.0000000000001940.
2. Mancia G, Fagard R, Narkiewicz K, Redon J, Zanchetti A, Bohm M, et al. 2013

- 1  
2  
3  
4 ESH/ESC Practice Guidelines for the Management of Arterial Hypertension.  
5 Blood Press 2014; 23 (1): 3-16. doi: 10.3109/08037051.2014.868629.  
6  
7  
8 3. Joffres M, Falaschetti E, Gillespie C, Robitaille C, Loustalot F, Poulter N, et al.  
9 Hypertension prevalence, awareness, treatment and control in national surveys  
10 from England, the USA and Canada, and correlation with stroke and ischaemic  
11 heart disease mortality: a cross-sectional study. *BMJ Open* 2013; 3 (8): e003423.  
12 doi: 10.1136/bmjopen-2013-003423.  
13  
14  
15 4. Carretero OA, Oparil S. Essential hypertension. Part I: definition and etiology.  
16 *Circulation* 2000; 101 (3): 329-335. doi: 10.1161/01.cir.101.3.329.  
17  
18  
19 5. Czopek A, Moorhouse R, Guyonnet L, Farrah T, Lenoir O, Owen E, et al. A  
20 novel role for myeloid endothelin-B receptors in hypertension. *Eur Heart J* 2019;  
21 40 (9): 768-784. doi: 10.1093/eurheartj/ehy881.  
22  
23  
24 6. Drummond GR, Vinh A, Guzik TJ, Sobey CG. Immune mechanisms of  
25 hypertension. *Nat Rev Immunol* 2019; 19 (8): 517-532. doi: 10.1038/s41577-  
26 019-0160-5.  
27  
28  
29 7. Chapple IL, Genco R, Working group 2 of joint EFPAAPw. Diabetes and  
30 periodontal diseases: consensus report of the Joint EFP/AAP Workshop on  
31 Periodontitis and Systemic Diseases. *J Clin Periodontol* 2013; 40 Suppl 14  
32 S106-112. doi: 10.1111/jcpe.12077.  
33  
34  
35 8. Lu HX, Tao DY, Lo ECM, Li R, Wang X, Tai BJ, et al. The 4th National Oral  
36 Health Survey in the Mainland of China: Background and Methodology. *Chin*  
37 *J Dent Res* 2018; 21 (3): 161-165. doi: 10.3290/j.cjdr.a41079.  
38  
39  
40 9. Sun HY, Jiang H, Du MQ, Wang X, Feng XP, Hu Y, et al. The Prevalence and  
41 Associated Factors of Periodontal Disease among 35 to 44-year-old Chinese  
42 Adults in the 4th National Oral Health Survey. *Chin J Dent Res* 2018; 21 (4):  
43 241-247. doi: 10.3290/j.cjdr.a41082.  
44  
45  
46 10. Tonetti MS, D'Aiuto F, Nibali L, Donald A, Storry C, Parkar M, et al. Treatment  
47 of periodontitis and endothelial function. *N Engl J Med* 2007; 356 (9): 911-920.  
48 doi: 10.1056/NEJMoa063186.  
49  
50  
51 11. Munoz Aguilera E, Suvan J, Buti J, Czesnikiewicz-Guzik M, Barbosa Ribeiro

- 1  
2  
3  
4 A, Orlandi M, et al. Periodontitis is associated with hypertension: a systematic  
5 review and meta-analysis. *Cardiovasc Res* 2020; 116 (1): 28-39. doi:  
6 10.1093/cvr/cvz201.  
7  
8  
9  
10 12. Pietropaoli D, Del Pinto R, Ferri C, Wright JT, Jr., Giannoni M, Ortu E, et al.  
11 Poor Oral Health and Blood Pressure Control Among US Hypertensive Adults.  
12 *Hypertension* 2018; 72 (6): 1365-1373. doi:  
13 10.1161/HYPERTENSIONAHA.118.11528.  
14  
15  
16  
17 13. Boos CJ, Lip GY. Is hypertension an inflammatory process? *Curr Pharm Des*  
18 2006; 12 (13): 1623-1635. doi: 10.2174/138161206776843313.  
19  
20  
21 14. Li JJ. Inflammation in hypertension: primary evidence. *Chin Med J (Engl)* 2006;  
22 119 (14): 1215-1221.  
23  
24  
25 15. Li JJ, Fang CH, Hui RT. Is hypertension an inflammatory disease? *Med*  
26 *Hypotheses* 2005; 64 (2): 236-240. doi: 10.1016/j.mehy.2004.06.017.  
27  
28  
29 16. Savoia C, Schiffrin EL. Inflammation in hypertension. *Curr Opin Nephrol*  
30 *Hypertens* 2006; 15 (2): 152-158. doi: 10.1097/01.mnh.0000203189.57513.76.  
31  
32  
33 17. Tonetti MS, Greenwell H, Kornman KS. Staging and grading of periodontitis:  
34 Framework and proposal of a new classification and case definition. *J*  
35 *Periodontol.* 2018 Jun;89 Suppl 1:S159-S172. doi: 10.1002/JPER.18-0006.  
36  
37  
38 18. Martin-Cabezas R, Seelam N, Petit C, Agossa K, Gaertner S, Tenenbaum H, et  
39 al. Association between periodontitis and arterial hypertension: A systematic  
40 review and meta-analysis. *Am Heart J* 2016; 180 98-112. doi:  
41 10.1016/j.ahj.2016.07.018.  
42  
43  
44  
45  
46 19. Muñoz Aguilera E, Suvan J, Buti J, Czesnikiewicz-Guzik M, Barbosa Ribeiro  
47 A, Orlandi M, Guzik TJ, Hingorani AD, Nart J, D'Aiuto F. Periodontitis is  
48 associated with hypertension: a systematic review and meta-analysis.  
49 *Cardiovasc Res.* 2020 Jan 1;116(1):28-39. doi: 10.1093/cvr/cvz201. PMID:  
50 31549149.  
51  
52  
53  
54  
55  
56 20. Chobanian AV, Bakris GL, Black HR, Cushman WC, Green LA, Izzo JL, Jr.,  
57 et al. Seventh report of the Joint National Committee on Prevention, Detection,  
58 Evaluation, and Treatment of High Blood Pressure. *Hypertension* 2003; 42 (6):  
59  
60



- 1206-1252. doi: 10.1161/01.HYP.0000107251.49515.c2.
21. Beck JD, Offenbacher S. Relationships among clinical measures of periodontal disease and their associations with systemic markers. *Ann Periodontol* 2002; 7 (1): 79-89. doi: 10.1902/annals.2002.7.1.79.
  22. Demmer RT, Kocher T, Schwahn C, Volzke H, Jacobs DR, Jr., Desvarieux M. Refining exposure definitions for studies of periodontal disease and systemic disease associations. *Community Dent Oral Epidemiol* 2008; 36 (6): 493-502. doi: 10.1111/j.1600-0528.2008.00435.x.
  23. Macedo Paizan ML, Vilela-Martin JF. Is there an association between periodontitis and hypertension? *Curr Cardiol Rev* 2014; 10 (4): 355-361. doi: 10.2174/1573403x10666140416094901.
  24. Czesnikiewicz-Guzik M, Osmenda G, Siedlinski M, Nosalski R, Pelka P, Nowakowski D, et al. Causal association between periodontitis and hypertension: evidence from Mendelian randomization and a randomized controlled trial of non-surgical periodontal therapy. *Eur Heart J* 2019; 40 (42): 3459-3470. doi: 10.1093/eurheartj/ehz646.
  25. Pietropaoli D, Del Pinto R, Ferri C, Ortu E, Monaco A. Definition of hypertension-associated oral pathogens in NHANES. *J Periodontol* 2019; 90 (8): 866-876. doi: 10.1002/JPER.19-0046.
  26. Taguchi A, Sanada M, Sueti Y, Ohtsuka M, Lee K, Tanimoto K, et al. Tooth loss is associated with an increased risk of hypertension in postmenopausal women. *Hypertension* 2004; 43 (6): 1297-1300. doi: 10.1161/01.HYP.0000128335.45571.ce.
  27. D'Aiuto F, Parkar M, Nibali L, Suvan J, Lessem J, Tonetti MS. Periodontal infections cause changes in traditional and novel cardiovascular risk factors: results from a randomized controlled clinical trial. *Am Heart J* 2006; 151 (5): 977-984. doi: 10.1016/j.ahj.2005.06.018.
  28. D'Aiuto F, Sabbah W, Netuveli G, Donos N, Hingorani AD, Deanfield J, et al. Association of the metabolic syndrome with severe periodontitis in a large U.S. population-based survey. *J Clin Endocrinol Metab* 2008; 93 (10): 3989-3994.

- 1  
2  
3  
4  
5  
6  
7  
8  
9  
10  
11  
12  
13  
14  
15  
16  
17  
18  
19  
20  
21  
22  
23  
24  
25  
26  
27  
28  
29  
30  
31  
32  
33  
34  
35  
36  
37  
38  
39  
40  
41  
42  
43  
44  
45  
46  
47  
48  
49  
50  
51  
52  
53  
54  
55  
56  
57  
58  
59  
60
- doi: 10.1210/jc.2007-2522.
29. Holmlund A, Holm G, Lind L. Severity of periodontal disease and number of remaining teeth are related to the prevalence of myocardial infarction and hypertension in a study based on 4,254 subjects. *J Periodontol* 2006; 77 (7): 1173-1178. doi: 10.1902/jop.2006.050233.
30. Morita T, Yamazaki Y, Mita A, Takada K, Seto M, Nishinoue N, et al. A cohort study on the association between periodontal disease and the development of metabolic syndrome. *J Periodontol* 2010; 81 (4): 512-519. doi: 10.1902/jop.2010.090594.
31. Rivas-Tumanyan S, Spiegelman D, Curhan GC, Forman JP, Joshipura KJ. Periodontal disease and incidence of hypertension in the health professionals follow-up study. *Am J Hypertens* 2012; 25 (7): 770-776. doi: 10.1038/ajh.2012.32.
32. Dye BA, Barker LK, Selwitz RH, Lewis BG, Wu T, Fryar CD, et al. Overview and quality assurance for the National Health and Nutrition Examination Survey (NHANES) oral health component, 1999-2002. *Community Dent Oral Epidemiol* 2007; 35 (2): 140-151. doi: 10.1111/j.1600-0528.2007.00310.x.
33. Wang Z, Chen Z, Zhang L, Wang X, Hao G, Zhang Z, et al. Status of Hypertension in China: Results From the China Hypertension Survey, 2012-2015. *Circulation* 2018; 137 (22): 2344-2356. doi: 10.1161/CIRCULATIONAHA.117.032380.

Table s1. Number of missing teeth by age groups and smoking status

|                | NT   |           | HT   |           | p*    |
|----------------|------|-----------|------|-----------|-------|
|                | Mean | 95% CI    | Mean | 95% CI    |       |
| 35-44          | 0.70 | 0.65~0.75 | 1.01 | 0.74~1.28 | 0.024 |
| 55-64          | 3.26 | 3.10~3.43 | 3.42 | 3.15~3.69 | 0.305 |
| 65-74          | 6.04 | 5.79~6.30 | 5.70 | 5.39~6.01 | 0.104 |
| Non-smoker     | 3.30 | 3.10~3.50 | 4.27 | 3.87~4.67 | 0.000 |
| Current smoker | 2.70 | 2.58~2.81 | 3.42 | 3.95~4.44 | 0.000 |
| Former smoker  | 3.55 | 3.21~3.89 | 5.70 | 4.68~5.98 | 0.000 |
| Total          | 2.94 | 2.84~3.04 | 4.35 | 4.15~4.55 | 0.000 |

HT = Hypertension; NT = Normotension;

\* significant difference by Student's t test.

STROBE Statement—Checklist of items that should be included in reports of *cross-sectional studies*

|                              | Item No | Recommendation                                                                                                                                                                                    | Page No |
|------------------------------|---------|---------------------------------------------------------------------------------------------------------------------------------------------------------------------------------------------------|---------|
| <b>Title and abstract</b>    | 1       | (a) Indicate the study's design with a commonly used term in the title or the abstract                                                                                                            | 1       |
|                              |         | (b) Provide in the abstract an informative and balanced summary of what was done and what was found                                                                                               | 3       |
| <b>Introduction</b>          |         |                                                                                                                                                                                                   |         |
| Background/rationale         | 2       | Explain the scientific background and rationale for the investigation being reported                                                                                                              | 4       |
| Objectives                   | 3       | State specific objectives, including any prespecified hypotheses                                                                                                                                  | 5       |
| <b>Methods</b>               |         |                                                                                                                                                                                                   |         |
| Study design                 | 4       | Present key elements of study design early in the paper                                                                                                                                           | 5       |
| Setting                      | 5       | Describe the setting, locations, and relevant dates, including periods of recruitment, exposure, follow-up, and data collection                                                                   | 6-8     |
| Participants                 | 6       | (a) Give the eligibility criteria, and the sources and methods of selection of participants                                                                                                       | 5       |
| Variables                    | 7       | Clearly define all outcomes, exposures, predictors, potential confounders, and effect modifiers. Give diagnostic criteria, if applicable                                                          | 6-8     |
| Data sources/<br>measurement | 8*      | For each variable of interest, give sources of data and details of methods of assessment (measurement). Describe comparability of assessment methods if there is more than one group              | 7       |
| Bias                         | 9       | Describe any efforts to address potential sources of bias                                                                                                                                         | 7       |
| Study size                   | 10      | Explain how the study size was arrived at                                                                                                                                                         | 5       |
| Quantitative variables       | 11      | Explain how quantitative variables were handled in the analyses. If applicable, describe which groupings were chosen and why                                                                      | 7       |
| Statistical methods          | 12      | (a) Describe all statistical methods, including those used to control for confounding                                                                                                             | 8-9     |
|                              |         | (b) Describe any methods used to examine subgroups and interactions                                                                                                                               | 8-9     |
|                              |         | (c) Explain how missing data were addressed                                                                                                                                                       | 8-9     |
|                              |         | (d) If applicable, describe analytical methods taking account of sampling strategy                                                                                                                | NA      |
|                              |         | (e) Describe any sensitivity analyses                                                                                                                                                             | NA      |
| <b>Results</b>               |         |                                                                                                                                                                                                   |         |
| Participants                 | 13*     | (a) Report numbers of individuals at each stage of study—eg numbers potentially eligible, examined for eligibility, confirmed eligible, included in the study, completing follow-up, and analysed | 9       |
|                              |         | (b) Give reasons for non-participation at each stage                                                                                                                                              | 9       |
|                              |         | (c) Consider use of a flow diagram                                                                                                                                                                | NA      |
| Descriptive data             | 14*     | (a) Give characteristics of study participants (eg demographic, clinical, social) and information on exposures and potential confounders                                                          | 9-10    |
|                              |         | (b) Indicate number of participants with missing data for each variable of interest                                                                                                               | NA      |
| Outcome data                 | 15*     | Report numbers of outcome events or summary measures                                                                                                                                              | 10-13   |

|    |                          |    |                                                                                                                                                                                                              |
|----|--------------------------|----|--------------------------------------------------------------------------------------------------------------------------------------------------------------------------------------------------------------|
| 1  |                          |    |                                                                                                                                                                                                              |
| 2  | Main results             | 16 | (a) Give unadjusted estimates and, if applicable, confounder-adjusted estimates and their precision (eg, 95% confidence interval). Make clear which confounders were adjusted for and why they were included |
| 3  |                          |    | 12-13                                                                                                                                                                                                        |
| 4  |                          |    |                                                                                                                                                                                                              |
| 5  |                          |    |                                                                                                                                                                                                              |
| 6  |                          |    | (b) Report category boundaries when continuous variables were categorized                                                                                                                                    |
| 7  |                          |    | NA                                                                                                                                                                                                           |
| 8  |                          |    |                                                                                                                                                                                                              |
| 9  |                          |    | (c) If relevant, consider translating estimates of relative risk into absolute risk for a meaningful time period                                                                                             |
| 10 |                          |    | NA                                                                                                                                                                                                           |
| 11 | Other analyses           | 17 | Report other analyses done—eg analyses of subgroups and interactions, and sensitivity analyses                                                                                                               |
| 12 |                          |    | NA                                                                                                                                                                                                           |
| 13 |                          |    |                                                                                                                                                                                                              |
| 14 | <b>Discussion</b>        |    |                                                                                                                                                                                                              |
| 15 | Key results              | 18 | Summarise key results with reference to study objectives                                                                                                                                                     |
| 16 |                          |    | 13-14                                                                                                                                                                                                        |
| 17 |                          |    |                                                                                                                                                                                                              |
| 18 | Limitations              | 19 | Discuss limitations of the study, taking into account sources of potential bias or imprecision. Discuss both direction and magnitude of any potential bias                                                   |
| 19 |                          |    | 18                                                                                                                                                                                                           |
| 20 |                          |    |                                                                                                                                                                                                              |
| 21 | Interpretation           | 20 | Give a cautious overall interpretation of results considering objectives, limitations, multiplicity of analyses, results from similar studies, and other relevant evidence                                   |
| 22 |                          |    | 14-17                                                                                                                                                                                                        |
| 23 |                          |    |                                                                                                                                                                                                              |
| 24 |                          |    |                                                                                                                                                                                                              |
| 25 | Generalisability         | 21 | Discuss the generalisability (external validity) of the study results                                                                                                                                        |
| 26 |                          |    | 17                                                                                                                                                                                                           |
| 27 | <b>Other information</b> |    |                                                                                                                                                                                                              |
| 28 | Funding                  | 22 | Give the source of funding and the role of the funders for the present study and, if applicable, for the original study on which the present article is based                                                |
| 29 |                          |    | 19                                                                                                                                                                                                           |
| 30 |                          |    |                                                                                                                                                                                                              |
| 31 |                          |    |                                                                                                                                                                                                              |
| 32 |                          |    |                                                                                                                                                                                                              |

\*Give information separately for exposed and unexposed groups.

**Note:** An Explanation and Elaboration article discusses each checklist item and gives methodological background and published examples of transparent reporting. The STROBE checklist is best used in conjunction with this article (freely available on the Web sites of PLoS Medicine at <http://www.plosmedicine.org/>, Annals of Internal Medicine at <http://www.annals.org/>, and Epidemiology at <http://www.epidem.com/>). Information on the STROBE Initiative is available at [www.strobe-statement.org](http://www.strobe-statement.org).

# BMJ Open

## Association Between Periodontitis and Hypertension: Cross-Sectional Survey from the Fourth National Oral Health Survey in China (2015-2016)

|                                 |                                                                                                                                                                                                                                                                                                                                                                                                                                                                                                                                                                                                                                                                                                                                                                                                                                                                                                                                                                                                                                                                                                                                                                        |
|---------------------------------|------------------------------------------------------------------------------------------------------------------------------------------------------------------------------------------------------------------------------------------------------------------------------------------------------------------------------------------------------------------------------------------------------------------------------------------------------------------------------------------------------------------------------------------------------------------------------------------------------------------------------------------------------------------------------------------------------------------------------------------------------------------------------------------------------------------------------------------------------------------------------------------------------------------------------------------------------------------------------------------------------------------------------------------------------------------------------------------------------------------------------------------------------------------------|
| Journal:                        | <i>BMJ Open</i>                                                                                                                                                                                                                                                                                                                                                                                                                                                                                                                                                                                                                                                                                                                                                                                                                                                                                                                                                                                                                                                                                                                                                        |
| Manuscript ID                   | bmjopen-2022-068724.R2                                                                                                                                                                                                                                                                                                                                                                                                                                                                                                                                                                                                                                                                                                                                                                                                                                                                                                                                                                                                                                                                                                                                                 |
| Article Type:                   | Original research                                                                                                                                                                                                                                                                                                                                                                                                                                                                                                                                                                                                                                                                                                                                                                                                                                                                                                                                                                                                                                                                                                                                                      |
| Date Submitted by the Author:   | 22-Dec-2022                                                                                                                                                                                                                                                                                                                                                                                                                                                                                                                                                                                                                                                                                                                                                                                                                                                                                                                                                                                                                                                                                                                                                            |
| Complete List of Authors:       | Zhan, Yalin; Peking University Hospital of Stomatology, First Clinical Division<br>Jiao, Jian; Peking University Hospital of Stomatology, Department of Periodontology<br>Jing, Wu-di; Peking University Hospital of Stomatology<br>Feng, Xiping; Shanghai Jiao Tong University School of Medicine Affiliated Ninth People's Hospital, Department of Preventive Dentistry<br>Tai, Baojun; Wuhan University, School & Hospital of Stomatology<br>Hu, Deyu; Sichuan University, West China School of Stomatology<br>Lin, Huan-cai; Sun Yat-Sen University, Guanghua School of Stomatology, Hospital of Stomatology<br>Wang, Bo; Peking University Hospital of Stomatology<br>Wang, Chunxiao; Chinese Center for Disease Control and Prevention<br>Zheng, Shuguo; Peking University Hospital of Stomatology<br>Liu, Xuenan; Peking University Hospital of Stomatology<br>Rong, Wensheng; Peking University Hospital of Stomatology<br>Wang, Weijian; Peking University Hospital of Stomatology<br>Wang, Xing; Peking University Hospital of Stomatology<br>Si, Yan; Peking University Hospital of Stomatology<br>Meng, Huanxin; Peking University Hospital of Stomatology |
| <b>Primary Subject Heading</b>: | Dentistry and oral medicine                                                                                                                                                                                                                                                                                                                                                                                                                                                                                                                                                                                                                                                                                                                                                                                                                                                                                                                                                                                                                                                                                                                                            |
| Secondary Subject Heading:      | Infectious diseases, Cardiovascular medicine                                                                                                                                                                                                                                                                                                                                                                                                                                                                                                                                                                                                                                                                                                                                                                                                                                                                                                                                                                                                                                                                                                                           |
| Keywords:                       | Hypertension < CARDIOLOGY, ORAL MEDICINE, Epidemiology < TROPICAL MEDICINE, Public health < INFECTIOUS DISEASES                                                                                                                                                                                                                                                                                                                                                                                                                                                                                                                                                                                                                                                                                                                                                                                                                                                                                                                                                                                                                                                        |
|                                 |                                                                                                                                                                                                                                                                                                                                                                                                                                                                                                                                                                                                                                                                                                                                                                                                                                                                                                                                                                                                                                                                                                                                                                        |

SCHOLARONE™  
Manuscripts



I, the Submitting Author has the right to grant and does grant on behalf of all authors of the Work (as defined in the below author licence), an exclusive licence and/or a non-exclusive licence for contributions from authors who are: i) UK Crown employees; ii) where BMJ has agreed a CC-BY licence shall apply, and/or iii) in accordance with the terms applicable for US Federal Government officers or employees acting as part of their official duties; on a worldwide, perpetual, irrevocable, royalty-free basis to BMJ Publishing Group Ltd ("BMJ") its licensees and where the relevant Journal is co-owned by BMJ to the co-owners of the Journal, to publish the Work in this journal and any other BMJ products and to exploit all rights, as set out in our [licence](#).

The Submitting Author accepts and understands that any supply made under these terms is made by BMJ to the Submitting Author unless you are acting as an employee on behalf of your employer or a postgraduate student of an affiliated institution which is paying any applicable article publishing charge ("APC") for Open Access articles. Where the Submitting Author wishes to make the Work available on an Open Access basis (and intends to pay the relevant APC), the terms of reuse of such Open Access shall be governed by a Creative Commons licence – details of these licences and which [Creative Commons](#) licence will apply to this Work are set out in our licence referred to above.

Other than as permitted in any relevant BMJ Author's Self Archiving Policies, I confirm this Work has not been accepted for publication elsewhere, is not being considered for publication elsewhere and does not duplicate material already published. I confirm all authors consent to publication of this Work and authorise the granting of this licence.

1  
2  
3  
4  
5 **Association Between Periodontitis and Hypertension: Cross-Sectional Survey**  
6  
7 **from the Fourth National Oral Health Survey in China (2015-2016)**  
8  
9

10 **Running title: Association between** periodontitis and hypertension  
11  
12  
13

14  
15 Ya-lin Zhan<sup>1\*</sup>, PhD, Jian Jiao<sup>1\*</sup>, DDS, Wu-di Jing<sup>1</sup>, DDS., Xi-ping Feng<sup>2</sup>, PhD, Bao-  
16 jun Tai<sup>3</sup>, PhD, De-yu Hu<sup>4</sup>, PhD, Huan-cai Lin<sup>5</sup>, PhD, Bo Wang<sup>6</sup>,EMBA, Chun-xiao  
17 Wang<sup>7</sup>, PhD, Shu-guo Zheng<sup>8</sup>,PhD, Xue-nan Liu<sup>8</sup>, PhD, Wen-sheng Rong<sup>8</sup>, PhD, Wei-  
18 jian Wang<sup>8</sup>, PhD, Xing Wang<sup>6</sup>, PhD, Yan Si<sup>8</sup>, PhD, Huan-xin Meng<sup>1</sup>, PhD,<sup>†</sup>  
19  
20  
21  
22  
23  
24  
25  
26  
27

28 <sup>1</sup> Department of Periodontology, Peking University School and Hospital of  
29 Stomatology, National Engineering Laboratory for Digital and Material Technology of  
30 Stomatology, Beijing Key Laboratory of Digital Stomatology, Beijing, P.R. China  
31  
32  
33  
34

35  
36 <sup>2</sup> Shanghai Ninth People's Hospital, Shanghai Jiao Tong University School of Medicine,  
37 Shanghai, P.R. China.  
38  
39

40  
41 <sup>3</sup> School & Hospital of Stomatology, Wuhan University, Wuhan, P.R. China.  
42  
43

44 <sup>4</sup> West China School of Stomatology, Sichuan University, Chengdu, P.R. China.  
45

46  
47 <sup>5</sup> Guanghua School of Stomatology, Hospital of Stomatology, Sun Yat-sen University,  
48 Guangzhou, P.R. China.  
49  
50

51  
52 <sup>6</sup> Chinese Stomatological Association, Beijing, P.R. China.  
53

54  
55 <sup>7</sup> Chinese Center for Disease Control and Prevention, Beijing, P.R. China.  
56

57  
58 <sup>8</sup> Department of Preventive Dentistry, Peking University School and Hospital of  
59 Stomatology, National Engineering Laboratory for Digital and Material Technology of  
60



1  
2  
3  
4 Stomatology, Beijing Key Laboratory of Digital Stomatology, Beijing, P.R. China  
5  
6  
7  
8

9 \*The two authors contributed equally to this work.  
10

11 † corresponding author  
12  
13  
14  
15  
16

17 **Corresponding author:** Huanxin Meng  
18

19 Department of Periodontology, Peking University School and Hospital of Stomatology,  
20  
21 National Engineering Laboratory for Digital and Material Technology of Stomatology,  
22  
23 Beijing Key Laboratory of Digital Stomatology Zhongguancun Nandajie 22, Haidian  
24  
25 District, 100081, Beijing, P.R.China  
26  
27  
28

29  
30 Email: [kqhxmeng@126.com](mailto:kqhxmeng@126.com)  
31

32  
33 Tel: +86-010-82195522; Fax: +86-010-82195522.  
34  
35  
36  
37

## 38 **ABSTRACT**

39  
40 **Objectives** To evaluate the association between periodontitis severity and hypertension  
41  
42 based on Chinese epidemiological data.  
43  
44

45 **Design** This cross-sectional survey enrolled adults from the Fourth National Oral  
46  
47 Health Survey of China (2015-2016).  
48  
49

50 **Setting** The data were obtained from the Fourth National Oral Health Survey of China  
51  
52 (2015-2016).  
53  
54

55 **Participants** The study included individuals aged 35-44 years (n = 4,409), 55-64 years  
56  
57 (n = 4,568), and 65-74 years (n = 4,218).  
58  
59  
60

1  
2  
3  
4 **Primary and secondary outcome measures** Periodontal status, defined on the basis  
5  
6 of the 2017 classification scheme, and periodontal parameters (e.g., bleeding on  
7  
8 probing [BOP]) were compared between hypertensive and normotensive individuals.  
9  
10 Smoothed scatterplots were constructed to demonstrate the associations of periodontal  
11  
12 parameters and periodontal status with hypertension.  
13  
14  
15

16  
17 **Results** Severe periodontitis (stages III and IV) was present in 41.4% and 28.0% of  
18  
19 hypertensive and normotensive individuals, respectively ( $p < 0.001$ ). The prevalence of  
20  
21 severe periodontitis was increase in hypertensive individuals than that in normotensive  
22  
23 individuals among participants aged 35-44 years (18.0% and 10.1%,  $p < 0.001$ ) and 55-  
24  
25 64 years (40.2% and 36.7%,  $p = 0.035$ ), but not in participants aged 65-74 years (46.4%  
26  
27 and 45.1%,  $p = 0.429$ ). Therefore, the difference in periodontal status between  
28  
29 hypertensive and normotensive individuals decreased with age. There were increased  
30  
31 prevalence of BOP,  $PD \geq 4$  mm, and  $PD \geq 6$  mm in hypertensive individuals than in  
32  
33 normotensive individuals (52.1% vs 49.2%, 19.6% vs 14.7%, and 1.8% vs 1.1%,  
34  
35 respectively). Periodontitis severity and the proportion of teeth with  $PD \geq 4$  or  $\geq 6$   
36  
37 mm were positively associated with hypertension.  
38  
39  
40  
41  
42  
43  
44

45  
46 **Conclusion** Periodontitis is associated with hypertension among Chinese adults.  
47  
48 Hypertension prevalence increased with periodontitis severity, particularly among  
49  
50 young participants. Accordingly, there is a need to improve the education and  
51  
52 awareness of periodontal treatment and preventive management among individuals at  
53  
54 risk for hypertension, particularly in younger population.  
55  
56  
57  
58  
59  
60

**Key Words:** Hypertension, oral medicine, epidemiology, public health.

### **Strengths and limitations of this study**

- The subject group was based on a large-scale national survey in China, and the sample size of the study was relatively large.
- Periodontitis was diagnosed in accordance with the classification proposed at the 2017 World Workshop.
- Hypertension was self-report and not based on blood pressure measurements.

### **INTRODUCTION**

Hypertension, which affects 45% of the global population, is the most common cardiovascular disease (CVDs) worldwide <sup>1,2</sup>. It is defined as systolic or diastolic blood pressure (BP) of  $\geq 140$  or  $\geq 90$  mmHg, respectively. Hypertension is frequently poorly controlled and untreated <sup>3</sup>. It is a complex disease with multiple causes and a major risk factor for CVDs <sup>4</sup>. Oxidative stress, endothelial dysfunction, and inflammation are associated with the development of hypertension <sup>5</sup>. The results of experimental and clinical studies suggest that inflammation has a major role in the development of hypertension <sup>6</sup>. Chronic inflammation predisposes to the development of pro-hypertensive inflammation.

Periodontal disease, an immune-inflammatory reaction to plaque biofilms <sup>7</sup>, has received substantial attention because of its association with CVDs. The Global Burden of Disease Study revealed that periodontitis was the sixth most prevalent disease

1  
2  
3  
4 worldwide. Periodontitis affects 743 million people worldwide (11.2% of the global  
5  
6 population); the prevalence is higher in China than in other countries. The Fourth  
7  
8 National Oral Health Survey of China showed that 90.9% individuals aged 35-44 years  
9  
10 had periodontal disease<sup>8,9</sup>. The low-grade inflammation associated with periodontitis  
11  
12 has harmful effects on the endothelial function, which may result in hypertension<sup>10</sup>. A  
13  
14 recent study revealed that individuals with periodontitis have increased risks of  
15  
16 hypertension and antihypertensive treatment failure<sup>11,12</sup>. Previous studies have  
17  
18 suggested that dental treatment can improve blood pressure, although the findings have  
19  
20 been inconclusive and further studies are needed<sup>13-16</sup>.

21  
22 Periodontitis and hypertension are major health problems, and their association  
23  
24 received considerable public health attention. Therefore, we evaluated the relationship  
25  
26 between periodontitis and hypertension based on the data from the Fourth National Oral  
27  
28 Health Survey of China. We sought to determine whether individuals with periodontitis  
29  
30 are more likely to have hypertension compared with individuals who do not have  
31  
32 periodontitis; we also sought to determine whether periodontitis severity is associated  
33  
34 with hypertension.

## 35 36 37 38 39 40 41 42 43 44 45 46 47 48 **MATERIALS AND METHODS**

### 49 50 51 *Study design and sample*

52  
53 This cross-sectional study obtained data from adult participants of the Fourth National  
54  
55 Oral Health Survey of China (2015-2016)<sup>8</sup>. The planned sample size was 4,230 each  
56  
57 for the age groups 35-44, 55-64 and 65-74 years. We excluded data from edentulous  
58  
59  
60

1  
2  
3  
4 participants and from participants without complete information. Finally, 13,195  
5  
6 individuals were included (4,409, 4,568, and 4,218 individuals aged 35-44, 55-64, and  
7  
8 65-74 years, respectively).  
9

### 10 11 12 13 14 ***Data collection***

15  
16 We collected data related to oral examination findings and questionnaire answers.  
17

#### 18 19 1. *Periodontal examination*

20  
21 Periodontal examinations were performed using a community periodontal index probe.  
22

23  
24 A full-mouth examination was performed, during which the probe was walked along  
25  
26 the gingival crevices using a force of  $\leq 20$  g to assess bleeding on probing (BOP), the  
27  
28 presence of calculus, probing depth (PD), and attachment loss (AL). For each parameter,  
29  
30 each tooth was scored according to the condition of the most severely affected site.  
31  
32

33  
34 Training programs were conducted for examiner calibration before the survey. The  
35  
36 reliability of the results was assessed using kappa values; kappa values for periodontal  
37  
38 pocket depth were  $\geq 0.6$ . Additionally, 5% of the participants were randomly selected  
39  
40 for assessment of inter-examiner reproducibility. The kappa values for all age-groups  
41  
42 were 0.76-0.80.  
43  
44  
45  
46  
47  
48  
49

### 50 51 ***Patient and public involvement***

52  
53 The study participants or the public were not involved in the design, or conduct, or  
54  
55 reporting, or dissemination plans of our research.  
56  
57  
58  
59  
60

### *Study parameters*

Supragingival and subgingival calculus were identified by visual examination and probing, respectively (0 = absent, 1 = present, 9 = tooth excluded, and X = tooth not present). PD was recorded as 0 (1–3 mm), 1 (4–5 mm), 2 ( $\geq 6$  mm), 9 (tooth excluded), or X (tooth not present). BOP was recorded as 0 (absent), 1 (present), 9 (tooth excluded), or X (tooth not present). AL was measured as the distance from the cemento-enamel junction to the bottom of the periodontal pocket; it was recorded as 0 (0–3 mm), 1 (4–5 mm), 2 (6–8 mm), 3 (9–11 mm), 4 ( $\geq 12$  mm), 9 (tooth excluded), or X (tooth not present).

The classification scheme proposed at the 2017 World Workshop on the Classification of Periodontal and Per-Implant Diseases and Conditions was used to classify the periodontal status as periodontally healthy ( $< 10\%$  BOP-positive sites and  $PD \leq 3$  mm) or gingivitis ( $\geq 10\%$  BOP-positive sites and  $PD \leq 3$  mm). Periodontitis was staged using the algorithm developed by Tonetti *et al*<sup>17</sup>. For each tooth, stages I-III periodontitis were defined as AL of 1–2 mm, 3–4 mm, and  $\geq 5$  mm, respectively. We also considered the number of teeth lost when classifying periodontitis: stages I and II, no tooth loss; stage III,  $\leq 4$  teeth lost; and stage IV,  $\geq 5$  teeth lost. The cause of tooth loss was not considered. Finally, we evaluated the complexity of patient management. Stage II patients were reclassified as stage III if the maximum PD was  $\geq 6$  mm. Stage III patients were reclassified as stage IV if there were  $< 10$  opposing pairs of teeth). Stages of periodontitis reflects the severity and complexity of managing the individual patient.

## 2. Interview data from the questionnaire

Questionnaires were administered during in-person interviews to collect data regarding demographics, socioeconomic status, habits, dental history, and health attitudes. The following information was collected for analysis: age (years), annual family income (in increments of 10,000 yuan), sex (male or female), duration of education (years), self-reported hypertension (yes or no), smoking status (current smoker, former smoker, or non-smoker), and region (urban or rural).

### *Statistical analyses*

Statistical analyses were performed using SPSS (version 19; IBM Corp., Armonk, NY, USA) or R (version 3.6.1; R Foundation for Statistical Computing, Vienna, Austria). The primary outcome was periodontal status (healthy, gingivitis, and stages I-IV periodontitis). The secondary outcomes were periodontal parameters (BOP-positive teeth, teeth with PD  $\geq 4$  and  $\geq 6$  mm, teeth with AL  $\geq 4$ ,  $\geq 6$ , and  $\geq 9$  mm, presented as percentages of teeth affected and numbers of teeth affected) and missing teeth. First, descriptive analysis was performed. Quantitative data were reported as means and standard deviations; categorical data were reported as numbers and percentages. Periodontal parameters were compared between hypertensive and normotensive individuals; subgroup analyses were conducted according to age group and smoking status. Periodontal status and parameters were analyzed using the chi-square test. Additionally, smoothed scatterplots based on generalized additive models

1  
2  
3  
4 were constructed, with adjustment for confounders (sex, smoking status, region,  
5  
6 duration of education, and annual family income), to evaluate the relationships of  
7  
8 hypertension prevalence with periodontal status or parameters. The level of statistical  
9  
10 significance was set at  $p < 0.05$ .  
11  
12  
13  
14  
15  
16

## 17 RESULTS

18  
19 The participants were randomly selected from 31 provinces, autonomous regions, and  
20  
21 municipalities in mainland China. In total, data from 13,195 individuals were included  
22  
23 in the analysis; invalid data from five participants and data from 264 edentulous patients  
24  
25 were excluded. The mean individual age was  $56.43 \pm 12.40$  years. The sample  
26  
27 consisted of 6,575 men (49.8%) and 6,620 women (50.2%). There were 3,470 non-  
28  
29 smokers (26.3%), 8,405 current smokers (63.7%), and 1,318 former smokers (10.0%).  
30  
31 Hypertension was present and absent in 3,154 (23.9%) and 10,041 (76.1%) participants,  
32  
33 respectively.  
34  
35  
36  
37  
38  
39  
40  
41  
42

### 43 *Differences in periodontal status between hypertensive and normotensive* 44 *participants decreased with age*

45  
46  
47 Table 1 present the distributions of periodontal status according to age, gender, and  
48  
49 smoking status in participants with and without hypertension.  
50  
51

52  
53 Significantly increase proportions of hypertensive participants had stages I-IV  
54  
55 periodontitis (70.3 % vs. 61.5%,  $p < 0.001$ ) and severe periodontitis (stages III-IV, 41.4  
56  
57 % vs. 28.0%,  $p < 0.001$ ), compared with normotensive participants. Stratified analysis  
58  
59  
60



1  
2  
3  
4 by gender showed that the prevalence of periodontitis (stage I-IV) was significantly  
5  
6 increase in hypertensive participants than in normotensive participants in females (66.5  
7  
8 % vs. 55.9 %,  $p < 0.001$ ) but not in males (74.0 % vs. 67.1%,  $p = 0.057$ ). Severe  
9  
10 periodontitis (stage III and stage IV) was more common in hypertensive participants  
11  
12 than in normotensive participants both in males (46.1% vs. 32.7 %,  $p < 0.001$ ) and  
13  
14 females (36.6 % vs. 23.4 %,  $p < 0.001$ ). Stratified analysis according to age showed  
15  
16 that the prevalence of periodontitis (stage I-IV) was significantly increase in  
17  
18 hypertensive participants than in normotensive participants among individuals aged 35-  
19  
20 44 years (59.2% vs. 52.3%,  $p = 0.030$ ), 55-64 years (72.7% vs. 69.1%,  $p = 0.023$ ), and  
21  
22 65-74 years (70.3% vs. 66.2%,  $p = 0.009$ ). Severe periodontitis (stage III and stage IV)  
23  
24 was more common in hypertensive participants than in normotensive participants  
25  
26 among individuals aged 35-44 years (18.0% vs. 10.1%,  $p < 0.001$ ) and 55-64 years  
27  
28 (40.2% vs. 36.7%,  $p = 0.035$ ), but not among individuals aged 65-74 years (46.4% vs.  
29  
30 45.1%,  $p = 0.429$ ). Therefore, differences in periodontal status between hypertensive  
31  
32 and normotensive participants decreased with age (Table 1). Stratified analysis by  
33  
34 smoking status showed that the prevalence of periodontitis (stage I-IV) was  
35  
36 significantly increase in hypertensive participants than in normotensive participants in  
37  
38 current smokers (76.2 % vs. 68.1%,  $p = 0.016$ ) and non-smokers (67.3 % vs. 57.4%,  $p$   
39  
40  $< 0.001$ ) but not in former smokers (73.8 % vs. 70.6%,  $p = 0.972$ ). Severe periodontitis  
41  
42 (stage III and stage IV) was more common in hypertensive participants than in  
43  
44 normotensive participants in all three sub-groups: current smokers (48.4% vs. 34.7%,  
45  
46  
47  
48  
49  
50  
51  
52  
53  
54  
55  
56  
57  
58  
59  
60

p < 0.001), non-smokers (36.9% vs. 23.7%, p < 0.001) and in former smokers (50.2 % vs. 38.0%, p < 0.001).

Table 1. Comparison of distribution of periodontal status according to the 2017 classification by age/gender/smoking groups between hypertensive and normotensive subjects.

| Group       | Periodontal status | NT   |      |           | HT  |      |           | p1*     | p2#     |
|-------------|--------------------|------|------|-----------|-----|------|-----------|---------|---------|
|             |                    | N    | %    | 95% CI    | N   | %    | 95% CI    |         |         |
| Male        | Health             | 598  | 11.9 | 11.1~12.9 | 159 | 10.2 | 8.7~11.7  | 0.057   | < 0.001 |
|             | Gingivitis         | 1051 | 21.0 | 19.9~22.1 | 246 | 15.7 | 14.0~17.6 |         |         |
|             | Stage I            | 844  | 16.8 | 15.8~17.9 | 171 | 10.9 | 9.5~12.6  |         |         |
|             | Stage II           | 883  | 17.6 | 16.6~18.7 | 266 | 17.0 | 15.2~18.9 |         |         |
|             | Stage III          | 906  | 18.1 | 17.0~19.2 | 357 | 22.8 | 20.8~25.0 |         |         |
|             | Stage IV           | 730  | 14.6 | 13.6~15.6 | 364 | 23.3 | 21.2~25.4 |         |         |
| Female      | Health             | 755  | 15.0 | 14.1~16.0 | 179 | 11.2 | 9.8~12.9  | < 0.001 | < 0.001 |
|             | Gingivitis         | 1461 | 29.1 | 27.8~30.3 | 355 | 22.3 | 20.3~24.4 |         |         |
|             | Stage I            | 867  | 17.2 | 16.2~18.3 | 199 | 12.5 | 10.9~14.2 |         |         |
|             | Stage II           | 770  | 15.3 | 14.3~16.3 | 277 | 17.4 | 15.6~19.3 |         |         |
|             | Stage III          | 588  | 11.7 | 10.8~12.6 | 260 | 16.3 | 14.6~18.2 |         |         |
|             | Stage IV           | 586  | 11.7 | 10.8~12.6 | 323 | 20.3 | 18.4~22.3 |         |         |
| 35-44 years | Health             | 658  | 15.9 | 14.8~17.1 | 40  | 14.4 | 10.7~18.9 | 0.030   | < 0.001 |
|             | Gingivitis         | 1312 | 31.8 | 30.3~33.2 | 73  | 26.4 | 21.4~31.8 |         |         |
|             | Stage I            | 1133 | 27.4 | 26.1~28.8 | 70  | 25.3 | 20.4~30.6 |         |         |
|             | Stage II           | 612  | 14.8 | 13.8~15.9 | 44  | 15.9 | 11.9~20.5 |         |         |
|             | Stage III          | 360  | 8.7  | 7.9~9.6   | 40  | 14.4 | 10.7~18.9 |         |         |
|             | Stage IV           | 57   | 1.4  | 1.1~1.8   | 10  | 3.6  | 1.9~6.3   |         |         |
| 55-64 years | Health             | 347  | 10.6 | 9.6~11.7  | 116 | 9.0  | 7.5~10.6  | 0.023   | 0.035   |
|             | Gingivitis         | 661  | 20.2 | 18.9~21.6 | 239 | 18.4 | 16.4~20.6 |         |         |
|             | Stage I            | 403  | 12.3 | 11.2~13.5 | 174 | 13.4 | 11.7~15.4 |         |         |
|             | Stage II           | 658  | 20.1 | 18.8~21.5 | 247 | 19.1 | 17.0~21.3 |         |         |
|             | Stage III          | 659  | 20.1 | 18.8~21.5 | 273 | 21.1 | 18.9~23.3 |         |         |
|             | Stage IV           | 544  | 16.6 | 15.4~17.9 | 247 | 19.1 | 17.0~21.3 |         |         |
| 65-74 years | Health             | 348  | 13.2 | 12.0~14.5 | 182 | 11.5 | 10.0~13.1 | 0.009   | 0.429   |
|             | Gingivitis         | 539  | 20.5 | 18.9~22.0 | 289 | 18.3 | 16.4~20.2 |         |         |
|             | Stage I            | 175  | 6.6  | 5.7~7.6   | 126 | 8.0  | 6.7~9.4   |         |         |
|             | Stage II           | 383  | 14.5 | 13.2~15.9 | 252 | 15.9 | 14.2~17.8 |         |         |
|             | Stage III          | 475  | 18.0 | 16.6~19.5 | 304 | 19.2 | 17.3~21.2 |         |         |

|  |                |            |      |      |           |     |      |           |         |         |
|--|----------------|------------|------|------|-----------|-----|------|-----------|---------|---------|
|  |                | Stage IV   | 715  | 27.1 | 25.5~28.8 | 430 | 27.2 | 25.0~29.4 |         |         |
|  | Current smoker | Health     | 346  | 12.8 | 11.6~14.2 | 75  | 9.7  | 7.7~11.9  |         |         |
|  |                | Gingivitis | 512  | 19.0 | 17.6~20.5 | 110 | 14.2 | 11.8~16.7 |         |         |
|  |                | Stage I    | 423  | 15.7 | 14.4~17.1 | 82  | 10.6 | 8.5~12.9  | 0.016   | < 0.001 |
|  |                | Stage II   | 478  | 17.7 | 16.3~19.2 | 134 | 17.2 | 14.7~20.0 |         |         |
|  |                | Stage III  | 491  | 18.2 | 16.8~19.7 | 198 | 25.5 | 22.5~28.6 |         |         |
|  |                | Stage IV   | 443  | 16.5 | 15.1~17.9 | 178 | 22.9 | 20.1~26.0 |         |         |
|  | Non-smoker     | Health     | 909  | 14.2 | 13.3~15.0 | 221 | 11.1 | 9.8~12.6  |         |         |
|  |                | Gingivitis | 1825 | 28.4 | 27.3~29.5 | 430 | 21.6 | 19.9~23.5 |         |         |
|  |                | Stage I    | 1167 | 18.2 | 17.3~19.1 | 249 | 12.5 | 11.1~14.0 | < 0.001 | < 0.001 |
|  |                | Stage II   | 994  | 15.5 | 14.6~16.4 | 356 | 17.9 | 16.3~19.6 |         |         |
|  |                | Stage III  | 803  | 12.5 | 11.7~13.3 | 337 | 17.0 | 15.4~18.6 |         |         |
|  |                | Stage IV   | 721  | 11.2 | 10.5~12.0 | 395 | 19.9 | 18.2~21.7 |         |         |
|  | Former smoker  | Health     | 98   | 10.6 | 8.7~12.7  | 42  | 10.7 | 8.0~14.1  |         |         |
|  |                | Gingivitis | 175  | 18.9 | 16.5~21.5 | 61  | 15.6 | 12.3~19.4 |         |         |
|  |                | Stage I    | 121  | 13.1 | 11.0~15.3 | 39  | 10.0 | 7.3~13.2  | 0.972   | < 0.001 |
|  |                | Stage II   | 181  | 19.5 | 17.1~22.2 | 53  | 13.6 | 10.4~17.2 |         |         |
|  |                | Stage III  | 200  | 21.6 | 19.0~24.3 | 82  | 21.0 | 17.2~25.2 |         |         |
|  |                | Stage IV   | 98   | 10.6 | 8.7~12.7  | 42  | 10.7 | 8.0~14.1  |         |         |
|  | Total          | Health     | 1353 | 13.5 | 12.8~14.2 | 338 | 10.7 | 9.7~11.8  |         |         |
|  |                | Gingivitis | 2512 | 25.0 | 24.2~25.9 | 601 | 19.0 | 17.7~20.4 |         |         |
|  |                | Stage I    | 1711 | 17.0 | 16.3~17.8 | 370 | 11.7 | 10.6~12.9 | < 0.001 | < 0.001 |
|  |                | Stage II   | 1653 | 16.5 | 15.8~17.2 | 543 | 17.2 | 15.9~18.6 |         |         |
|  |                | Stage III  | 1494 | 14.9 | 14.2~15.6 | 617 | 19.6 | 18.2~21.0 |         |         |
|  |                | Stage IV   | 1316 | 13.1 | 12.5~13.8 | 687 | 21.8 | 20.4~23.2 |         |         |

HT = Hypertension; NT = Normotension.

\*Significance values of differences of distribution proportion of periodontitis (stage I to IV) and non-periodontitis (health and gingivitis) between hypertensive and normotensive subjects by Chi square test;

#Significance values of differences of distribution proportion of severe periodontitis (stage III and IV) and non-severe-periodontitis (health, gingivitis, stage I and stage II) between hypertensive and normotensive subjects by Chi square test.

***Periodontal parameters were significantly worse in hypertensive participants than in normotensive participants***

Tables 2 and 3 present comparisons of periodontal parameters between hypertensive and normotensive participants. Compared with normotensive participants, hypertensive participants had significantly increase proportions of teeth with BOP (52.1% vs. 49.2%),

1  
2  
3  
4 PD  $\geq$  4 mm (19.6% vs. 14.7%), PD  $\geq$  6 mm (1.8% vs. 1.1%), AL  $\geq$  4 mm (23.6%  
5  
6 vs. 17.2%), AL  $\geq$  6 mm (6.6% vs. 4.4%). Differences in the percentage of teeth with  
7  
8 each periodontal parameters between hypertensive and normotensive participants were  
9  
10 consistent in males and females, and among current smokers, former smokers, and non-  
11  
12 smokers (except for BOP, whose significant differences were not found in males,  
13  
14 current smokers and former smokers; and PD $\geq$ 6 mm, whose significant differences  
15  
16 were not found in former smokers). Differences in periodontal parameters between  
17  
18 hypertensive and normotensive participants decreased with age. Difference in the mean  
19  
20 prevalence of PD  $\geq$  4 mm were consistent in all age-groups. Compared with  
21  
22 normotensive participants, hypertensive participants significantly increased numbers of  
23  
24 teeth with PD  $\geq$  4 mm (4.5 vs. 3.5), PD  $\geq$  6 mm (0.4 vs. 0.2), AL  $\geq$  4 mm (5.0 vs. 3.8),  
25  
26 and AL  $\geq$  6 mm (1.2 vs. 0.8). The mean number of BOP-positive teeth was not  
27  
28 significant difference between hypertensive and normotensive participants (12.4 vs.  
29  
30 12.3). Differences in the mean number of teeth with each periodontal parameters  
31  
32 between hypertensive and normotensive participants were consistent in males and  
33  
34 females, and among current smokers, former smokers, and non-smokers (except for  
35  
36 BOP, whose significant differences were found in females, and PD $\geq$ 6 mm, whose  
37  
38 significant differences were not found in former smokers). The difference in the mean  
39  
40 number of teeth between hypertensive and normotensive participants decreased with  
41  
42 age. Furthermore, differences in the number of teeth with PD  $\geq$  4 mm and PD  $\geq$  6  
43  
44 mm sites were consistent in all age-groups.  
45  
46  
47  
48  
49  
50  
51  
52  
53  
54  
55  
56  
57  
58  
59  
60

Table 2. Comparison of the percentage of teeth with each periodontal parameter between hypertensive and normotensive subjects by gender, age groups and smoking status.

| Group          | Periodontal parameter | NT   |           | HT   |           | p*      |
|----------------|-----------------------|------|-----------|------|-----------|---------|
|                |                       | Mean | 95% CI    | Mean | 95% CI    |         |
| Male           | BOP+                  | 50.9 | 49.9~51.9 | 52.2 | 50.4~54.0 | 0.232   |
|                | PD≥ 4mm               | 17.9 | 17.2~18.6 | 22.6 | 21.3~24.0 | < 0.001 |
|                | PD≥ 6mm               | 1.5  | 1.3~1.6   | 2.3  | 1.9~2.7   | < 0.001 |
|                | AL≥ 4mm               | 20.9 | 20.2~21.7 | 27.5 | 26.0~28.9 | < 0.001 |
|                | AL≥ 6mm               | 5.7  | 5.3~6.1   | 8.3  | 7.5~9.1   | < 0.001 |
| Female         | BOP+                  | 47.4 | 46.5~48.4 | 52.1 | 50.4~53.8 | < 0.001 |
|                | PD≥ 4mm               | 11.5 | 11.0~12.0 | 16.5 | 15.4~17.6 | < 0.001 |
|                | PD≥ 6mm               | 0.7  | 0.6~0.8   | 1.3  | 1.0~1.6   | < 0.001 |
|                | AL≥ 4mm               | 13.5 | 12.9~14.0 | 19.8 | 18.6~20.9 | < 0.001 |
|                | AL≥ 6mm               | 3.2  | 2.9~3.4   | 4.8  | 4.2~5.4   | < 0.001 |
| 35-44 years    | BOP+                  | 46.5 | 45.4~47.5 | 50.5 | 46.1~54.9 | 0.096   |
|                | PD≥ 4mm               | 10.5 | 9.9~11.1  | 15.8 | 12.8~18.8 | 0.001   |
|                | PD≥ 6mm               | 0.5  | 0.4~0.6   | 1.1  | 0.6~1.6   | 0.031   |
|                | AL≥ 4mm               | 6    | 5.6~6.4   | 10.1 | 7.8~12.4  | 0.001   |
|                | AL≥ 6mm               | 0.8  | 0.7~0.9   | 1.6  | 0.8~2.4   | 0.053   |
| 55-64 years    | BOP+                  | 52.5 | 51.3~53.7 | 54.0 | 52.1~56.0 | 0.188   |
|                | PD≥ 4mm               | 17.9 | 17.1~18.8 | 20.3 | 18.9~21.7 | 0.004   |
|                | PD≥ 6mm               | 1.4  | 1.2~1.6   | 1.9  | 1.6~2.2   | 0.024   |
|                | AL≥ 4mm               | 22.1 | 21.2~22.9 | 21.5 | 20.1~22.9 | 0.543   |
|                | AL≥ 6mm               | 5.3  | 4.9~5.8   | 5.5  | 4.8~6.2   | 0.722   |
| 65-74 years    | BOP+                  | 49.2 | 47.9~50.6 | 50.8 | 49.1~52.6 | 0.144   |
|                | PD≥ 4mm               | 17.4 | 16.5~18.3 | 19.6 | 18.4~20.8 | 0.004   |
|                | PD≥ 6mm               | 1.5  | 1.3~1.8   | 1.8  | 1.5~2.2   | 0.188   |
|                | AL≥ 4mm               | 28.7 | 27.6~29.8 | 27.6 | 26.3~29.0 | 0.239   |
|                | AL≥ 6mm               | 8.9  | 8.3~9.6   | 8.3  | 7.5~9.1   | 0.220   |
| Current smoker | BOP+                  | 49.7 | 48.3~51.1 | 51.3 | 48.8~53.9 | 0.286   |
|                | PD≥ 4mm               | 19.9 | 18.9~20.9 | 24.1 | 22.2~26.0 | < 0.001 |
|                | PD≥ 6mm               | 1.6  | 1.4~1.9   | 2.4  | 1.9~3.0   | 0.007   |
|                | AL≥ 4mm               | 22.5 | 21.4~23.6 | 28.8 | 26.7~30.9 | < 0.001 |
|                | AL≥ 6mm               | 6.6  | 6.0~7.2   | 8.8  | 7.6~10.0  | 0.001   |
| Non-smoker     | BOP+                  | 48.5 | 47.7~49.4 | 52.3 | 50.7~53.8 | < 0.001 |
|                | PD≥ 4mm               | 12.1 | 11.6~12.6 | 17.0 | 16.0~18.0 | < 0.001 |
|                | PD≥ 6mm               | 0.7  | 0.6~0.8   | 1.4  | 1.1~1.6   | < 0.001 |
|                | AL≥ 4mm               | 14.0 | 13.4~14.5 | 20.4 | 19.3~21.4 | < 0.001 |
|                | AL≥ 6mm               | 3.3  | 3.0~3.5   | 5.1  | 4.6~5.7   | < 0.001 |

|               |               |      |           |      |           |         |
|---------------|---------------|------|-----------|------|-----------|---------|
| Former smoker | BOP+          | 51.7 | 49.4~54.0 | 53.0 | 49.4~56.6 | 0.548   |
|               | PD $\geq$ 4mm | 17.8 | 16.3~19.4 | 23.7 | 20.9~26.5 | < 0.001 |
|               | PD $\geq$ 6mm | 1.9  | 1.4~2.4   | 2.6  | 1.8~3.4   | 0.129   |
|               | AL $\geq$ 4mm | 23.8 | 27.8~33.6 | 32.8 | 28.6~36.9 | 0.001   |
|               | AL $\geq$ 6mm | 6.2  | 5.3~7.1   | 9.4  | 7.6~11.1  | 0.002   |
| Total         | BOP+          | 49.2 | 48.5~49.9 | 52.1 | 50.9~53.4 | < 0.001 |
|               | PD $\geq$ 4mm | 14.7 | 14.3~15.2 | 19.6 | 18.7~20.4 | < 0.001 |
|               | PD $\geq$ 6mm | 1.1  | 1.0~1.2   | 1.8  | 1.6~2.0   | < 0.001 |
|               | AL $\geq$ 4mm | 17.2 | 16.7~17.7 | 23.6 | 22.7~24.5 | < 0.001 |
|               | AL $\geq$ 6mm | 4.4  | 4.2~4.7   | 6.6  | 6.0~7.1   | < 0.001 |

AL= attachment loss; BOP = bleeding on probing; HT = Hypertension;

NT = Normotension; PD = probing depth;

\* significant difference by Student's t test.

Table 3. Comparison of the number of teeth with each periodontal parameter between hypertensive and normotensive subjects by gender, age groups and smoking status.

| Group       | Periodontal parameter | NT   |           | HT   |           | p*      |
|-------------|-----------------------|------|-----------|------|-----------|---------|
|             |                       | Mean | 95% CI    | Mean | 95% CI    |         |
| Male        | BOP+                  | 12.7 | 12.5~13.0 | 12.3 | 11.8~12.8 | 0.111   |
|             | PD $\geq$ 4mm         | 4.2  | 4.0~4.4   | 5.1  | 4.8~5.4   | < 0.001 |
|             | PD $\geq$ 6mm         | 0.3  | 0.3~0.3   | 0.5  | 0.4~0.6   | < 0.001 |
|             | AL $\geq$ 4mm         | 4.6  | 4.5~4.8   | 5.7  | 5.4~6.0   | < 0.001 |
|             | AL $\geq$ 6mm         | 1.1  | 1.0~1.1   | 1.5  | 1.3~1.6   | < 0.001 |
| Female      | BOP+                  | 11.9 | 11.7~12.1 | 12.6 | 12.1~13.0 | 0.013   |
|             | PD $\geq$ 4mm         | 2.7  | 2.6~2.9   | 3.8  | 3.6~4.1   | < 0.001 |
|             | PD $\geq$ 6mm         | 0.1  | 0.1~0.2   | 0.3  | 0.2~0.3   | < 0.001 |
|             | AL $\geq$ 4mm         | 2.9  | 2.8~3.1   | 4.3  | 4.0~4.5   | < 0.001 |
|             | AL $\geq$ 6mm         | 0.6  | 0.5~0.6   | 0.9  | 0.8~1.0   | < 0.001 |
| 35-44 years | BOP+                  | 12.7 | 12.4~13.0 | 13.6 | 12.4~14.8 | 0.143   |
|             | PD $\geq$ 4mm         | 2.8  | 2.7~3.0   | 4.2  | 3.4~5.0   | 0.001   |
|             | PD $\geq$ 6mm         | 0.1  | 0.1~0.2   | 0.3  | 0.1~0.4   | 0.036   |
|             | AL $\geq$ 4mm         | 1.6  | 1.5~1.7   | 2.6  | 2.0~3.2   | 0.001   |
|             | AL $\geq$ 6mm         | 0.2  | 0.2~0.2   | 0.4  | 0.2~0.6   | 0.049   |
| 55-64 years | BOP+                  | 13.0 | 12.7~13.3 | 13.4 | 12.9~13.9 | 0.241   |
|             | PD $\geq$ 4mm         | 4.2  | 4.0~4.4   | 4.8  | 4.4~5.1   | 0.005   |
|             | PD $\geq$ 6mm         | 0.3  | 0.2~0.3   | 0.4  | 0.3~0.5   | 0.003   |
|             | AL $\geq$ 4mm         | 5.0  | 4.8~5.2   | 4.8  | 4.5~5.1   | 0.222   |
|             | AL $\geq$ 6mm         | 1.1  | 1.0~1.2   | 1.1  | 1.0~1.2   | 0.914   |

|                |               |      |           |      |           |         |
|----------------|---------------|------|-----------|------|-----------|---------|
| 65-74          | BOP+          | 10.9 | 10.6~11.3 | 11.5 | 11.0~11.9 | 0.051   |
| years          | PD $\geq$ 4mm | 3.5  | 3.3~3.7   | 4.3  | 4.0~4.5   | < 0.001 |
|                | PD $\geq$ 6mm | 0.3  | 0.2~0.3   | 0.4  | 0.3~0.4   | 0.042   |
|                | AL $\geq$ 4mm | 5.7  | 5.4~5.9   | 5.6  | 5.3~5.9   | 0.752   |
|                | AL $\geq$ 6mm | 1.5  | 1.4~1.6   | 1.4  | 1.3~1.5   | 0.508   |
| Current smoker | BOP+          | 12.3 | 11.9~12.7 | 12.1 | 11.4~12.8 | 0.583   |
|                | PD $\geq$ 4mm | 4.6  | 4.4~4.8   | 5.5  | 5.0~6.0   | 0.001   |
|                | PD $\geq$ 6mm | 0.3  | 0.3~0.4   | 0.5  | 0.4~0.6   | 0.001   |
|                | AL $\geq$ 4mm | 4.9  | 4.6~5.1   | 6.1  | 5.7~6.6   | < 0.001 |
| Non-smoker     | AL $\geq$ 6mm | 1.2  | 1.1~1.3   | 1.6  | 1.4~1.8   | 0.001   |
|                | BOP+          | 12.3 | 12.1~12.5 | 12.6 | 12.2~13.0 | 0.159   |
|                | PD $\geq$ 4mm | 2.9  | 2.8~3.0   | 3.9  | 3.7~4.2   | < 0.001 |
|                | PD $\geq$ 6mm | 0.2  | 0.1~0.2   | 0.3  | 0.2~0.3   | < 0.001 |
| Former smoker  | AL $\geq$ 4mm | 3.1  | 3.0~3.2   | 4.4  | 4.2~4.6   | < 0.001 |
|                | AL $\geq$ 6mm | 0.6  | 0.6~0.6   | 0.9  | 0.8~1.0   | < 0.001 |
|                | BOP+          | 12.7 | 12.1~13.3 | 12.2 | 11.3~13.1 | 0.359   |
|                | PD $\geq$ 4mm | 4.1  | 3.8~4.5   | 5.1  | 4.5~5.8   | 0.006   |
| Total          | PD $\geq$ 6mm | 0.4  | 0.3~0.4   | 0.5  | 0.4~0.7   | 0.069   |
|                | AL $\geq$ 4mm | 5.3  | 4.9~5.7   | 5.9  | 5.3~6.6   | 0.081   |
|                | AL $\geq$ 6mm | 1.2  | 1.0~1.3   | 1.7  | 1.4~2.0   | 0.005   |
|                | BOP+          | 12.3 | 12.2~12.5 | 12.4 | 12.1~14.8 | 0.574   |
|                | PD $\geq$ 4mm | 3.5  | 3.4~3.6   | 4.5  | 4.2~4.7   | < 0.001 |
|                | PD $\geq$ 6mm | 0.2  | 0.2~0.2   | 0.4  | 0.3~0.4   | < 0.001 |
|                | AL $\geq$ 4mm | 3.8  | 3.7~3.9   | 5.0  | 4.8~5.2   | < 0.001 |
|                | AL $\geq$ 6mm | 0.8  | 0.8~0.9   | 1.2  | 1.1~1.3   | < 0.001 |

AL= attachment loss; BOP = bleeding on probing; HT = Hypertension;

NT = Normotension; PD = probing depth;

\* significant difference by Student's t test.

### ***Hypertension prevalence increased with periodontitis severity***

Multivariate regression analysis was performed to evaluate the relationship between hypertension and age stratified according to periodontal status, after adjustments for sex, smoking status, region, duration of education, and annual family income (Table 4).

Compared with participants who did not have periodontitis, participants with stages III and IV periodontitis had a significant increased risk of hypertension (odds ratio [OR] =

1.70, 95% confidence interval [CI] = 1.45-1.99,  $p < 0.001$ ). However, the difference between participants with stages I and II periodontitis and participants without periodontitis was not statistically significant (OR = 1.03, 95% CI = 0.88-1.20,  $p = 0.717$ ). Therefore, hypertension prevalence increased with periodontitis severity. Notably, the OR for participants with stages III and IV periodontitis decreased with age; it was not statistically significant in participants aged 65-74 years (Table 4).

Table 4. Relationships between blood pressure (hypertension vs. normotension) and periodontal status (compared with non-periodontitis) according to the 2017 classification analyzed by logistic regressions with adjustment for gender, smoking status, region, years of education, and annual family income

| Age group   | Periodontal status*                         | OR   | 95% CI    | p       |
|-------------|---------------------------------------------|------|-----------|---------|
| 35-44 years | Periodontitis (stage III & IV) <sup>#</sup> | 1.62 | 1.00~2.61 | 0.050   |
|             | Periodontitis (stage I & II) <sup>#</sup>   | 0.97 | 0.65~1.43 | 0.863   |
| 55-64 years | Periodontitis (stage III & IV) <sup>#</sup> | 1.40 | 1.07~1.84 | 0.015   |
|             | Periodontitis (stage I & II) <sup>#</sup>   | 1.30 | 1.00~1.69 | 0.051   |
| 65-74 years | Periodontitis (stage III & IV) <sup>#</sup> | 1.21 | 0.96~1.42 | 0.113   |
|             | Periodontitis (stage I & II) <sup>#</sup>   | 1.12 | 0.96~1.42 | 0.336   |
| Total       | Periodontitis (stage III & IV) <sup>#</sup> | 1.70 | 1.45~1.99 | < 0.001 |
|             | Periodontitis (stage I & II) <sup>#</sup>   | 1.03 | 0.88~1.20 | 0.717   |

\* According to the 2017 World Workshop on the Classification of Periodontal and Per-Implant Diseases and Conditions <sup>17</sup>.

### ***Relationships of hypertension with periodontal parameters***

Table 5 and Table 6 present the multivariate regression analyses of the relationships of hypertension with periodontal parameters, after adjustments for sex, smoking status,



region, duration of education, and annual family income. Hypertension prevalence increased with increases in the proportions of teeth with BOP (OR = 1.20, 95% CI = 1.05-1.38,  $p = 0.006$ ), PD  $\geq 4$  mm (OR = 1.73, 95% CI = 1.43-2.10,  $p < 0.001$ ), and PD  $\geq 6$  mm (OR = 2.44, 95% CI = 1.19-5.03,  $p = 0.015$ ), but it decreased with increases in the proportions of teeth with AL  $\geq 4$  mm (OR = 0.87, 95% CI = 0.73-1.05,  $p = 0.155$ ) and AL  $\geq 6$  mm (OR = 0.74, 95% CI = 0.53-1.04,  $p = 0.083$ ). There were significant positive associations of hypertension with the number of teeth with BOP (OR = 1.01, 95% CI = 1.00-1.01,  $p = 0.001$ ), PD  $\geq 4$  mm (OR = 1.03, 95% CI = 1.02-1.04,  $p < 0.001$ ), and PD  $\geq 6$  mm (OR = 1.07, 95% CI = 1.03-1.11,  $p < 0.001$ ). There were statistically insignificant negative associations of the presence of hypertension with the proportions of teeth with AL  $\geq 4$  mm and AL  $\geq 6$  mm (Table 6).

Table 5. Relationships between blood pressure (hypertension vs. normotension) and percentage of teeth affected with different threshold of periodontal parameters analyzed by logistic regressions with adjustment for age, gender, smoking status, region, years of education, and annual family income.

| Periodontal parameter | OR*  | 95% CI    | p       |
|-----------------------|------|-----------|---------|
| BOP+                  | 1.20 | 1.05~1.38 | 0.006   |
| PD $\geq 4$ mm        | 1.73 | 1.43~2.10 | < 0.001 |
| PD $\geq 6$ mm        | 2.44 | 1.19~5.03 | 0.015   |
| AL $\geq 4$ mm        | 0.87 | 0.73~1.05 | 0.155   |
| AL $\geq 6$ mm        | 0.74 | 0.53~1.04 | 0.083   |

AL= attachment loss; BOP = bleeding on probing; PD = probing depth;

\* The odds ratio as periodontal parameter increased by one percent (for example, as BOP+ $\%$  increases by 1%, the odds of hypertension increase by 20%, in another word,

1.20 minus 1) <sup>18,19</sup>.

Table 6. Relationships between blood pressure (hypertension vs. normotension) and number of teeth affected with different threshold of periodontal parameters analyzed by logistic regressions with adjustment for age, gender, smoking status, region, years of education, and annual family income.

| Periodontal parameter | OR*  | 95% CI    | p       |
|-----------------------|------|-----------|---------|
| BOP+                  | 1.01 | 1.00~1.01 | 0.001   |
| PD≥ 4mm               | 1.03 | 1.02~1.04 | < 0.001 |
| PD≥ 6mm               | 1.07 | 1.03~1.11 | < 0.001 |
| AL≥ 4mm               | 1.00 | 0.99~1.01 | 0.507   |
| AL≥ 6mm               | 0.99 | 0.97~1.01 | 0.217   |

AL= attachment loss; BOP = bleeding on probing; PD = probing depth.

\* The odds ratio as periodontal parameters increased by one percent (for example, as BOP+% increases by one tooth, the odds of hypertension increase by 1%, in another word, 1.01 minus 1) <sup>18,19</sup>.

***Significantly more teeth were missing in hypertensive participants than in normotensive participants***

Table S1 presents a comparison of the number of missing teeth between participants with and without hypertension. Significantly more teeth were missing in hypertensive participants than in normotensive participants (4.4 vs. 2.9 teeth). The difference in the number of missing teeth between hypertensive and normotensive participants decreased with age. The differences in missing teeth between hypertensive and normotensive participants were generally consistent in males and females, and among current smokers, former smokers, and non-smokers.

## DISCUSSION

1  
2  
3  
4 Based on data from the Fourth National Oral Health Survey of China, periodontitis is  
5  
6 significantly and strongly associated with hypertension among Chinese adults,  
7  
8 independent of the effects of age, sex, and smoking. The association between  
9  
10 periodontitis and hypertension reported in this study is in agreement with that recently  
11  
12 reported reviews <sup>20,21</sup>. This association between periodontitis and hypertension has  
13  
14 considerable importance <sup>22</sup>.  
15  
16  
17

18  
19 In recent systemic reviews analyzing the association between periodontitis and  
20  
21 hypertension, the included studies had been conducted in different countries across Asia,  
22  
23 Europe, America, and Africa, lacking the large-scale data from China <sup>20,21</sup>. In this study,  
24  
25 we used data from a large-scale national survey in which participants were  
26  
27 representative of the Chinese population. Besides, the lack of consistent measures of  
28  
29 case definition and severity of periodontitis in the retrieved studies did not allow for a  
30  
31 relevant analysis of extent and severity of periodontitis with hypertension. In the  
32  
33 present study, periodontitis was diagnosed in accordance with the classification  
34  
35 proposed at the 2017 World Workshop. The association of hypertension with  
36  
37 periodontitis was assessed according to age and smoking status to minimize errors and  
38  
39 the effects of confounding factors. Periodontitis was associated with an increase  
40  
41 prevalence of hypertension among Chinese adults, independent of known confounders.  
42  
43 In most of the studies, periodontal status was clinically evaluated through PD and/or  
44  
45 clinical attachment level measurement <sup>20,21</sup>. Nevertheless, several definitions of  
46  
47 periodontal diseases have been used across studies and only a few have distinguished  
48  
49 severe forms of periodontitis. In the present study, periodontitis severity was defined  
50  
51  
52  
53  
54  
55  
56  
57  
58  
59  
60

1  
2  
3  
4 using the 2017 World Workshop on the Classification of Periodontal and Peri-Implant  
5  
6 Diseases and Conditions. Participants with severe periodontal disease (stages III and  
7  
8 IV periodontitis) had an increased risk of hypertension compared with participants who  
9  
10 had mild or no periodontal disease.  
11

12  
13  
14 Hypertension prevalence increased with periodontitis severity, particularly among  
15  
16 young participants (35-44 years). Therefore, participants with risk factors, particularly  
17  
18 young adults, should engage in healthy lifestyle habits to improve their oral health.  
19  
20 Accordingly, there is a need to improve the education and awareness of dental treatment  
21  
22 and preventive management among individuals at risk for hypertension, particularly in  
23  
24 younger population. Periodontitis and hypertension are chronic diseases; therefore,  
25  
26 substantial exposure time may be necessary for their development. The exposure time  
27  
28 to risk factors may be considerably shorter in younger individuals than that in older  
29  
30 individuals. The influence of the longer exposure time to the common risk factors for  
31  
32 periodontitis and hypertension in older individuals may mask the effects of  
33  
34 periodontitis on the development of hypertension. When the confounding effects of the  
35  
36 risk factors were removed, a link between periodontitis and hypertension was identified.  
37  
38 Therefore, severe periodontitis may have a greater role in the development of  
39  
40 hypertension among younger individuals than among older individuals. The association  
41  
42 of periodontitis with hypertension was also present in never smokers and former  
43  
44 smokers, who had less exposure to common risk factors. The greater susceptibility to  
45  
46 hypertension among young individuals with severe periodontitis may be attributed to  
47  
48 periodontal inflammation.  
49  
50  
51  
52  
53  
54  
55  
56  
57  
58  
59  
60

1  
2  
3  
4 This study evaluated the association between periodontal status and hypertension risk  
5  
6 among young and older adults. Hypertension prevalence increased with periodontitis  
7  
8 severity, which was most prominent in individuals aged 35-44 years. Adult aged < 65  
9  
10 years with hypertension had significantly greater risks of stages III and IV periodontitis,  
11  
12 compared with individuals who did not have hypertension. Therefore, healthcare  
13  
14 providers should carefully monitor oral health status in their patients to prevent  
15  
16 hypertension, particularly among adults; they should conduct regular oral examinations  
17  
18 and engage in periodontal disease management.  
19  
20  
21  
22  
23

24 This study exhibited the percentage of teeth with each periodontal status that means  
25  
26 extension of periodontal pathology in the oral cavity. The association between  
27  
28 periodontitis and hypertension was also present in participants who had a greater  
29  
30 proportion of teeth with BOP or deep periodontal pockets. The findings suggest that  
31  
32 severe and extensive periodontal inflammation, as evidenced by the depth of the  
33  
34 inflamed periodontal pocket and the number of bleeding sites, is associated with  
35  
36 hypertension. In particular, the presence of BOP indicates acute inflammation, which  
37  
38 may lead to systemic effects and subsequent hypertension. The association of  
39  
40 inflammation (i.e., PD) with hypertension suggests that persistent, long-term, and  
41  
42 extensive inflammation may also underlie this relationship. Compared with AL, PD  
43  
44 seems to be more closely related to hypertension. For example, significant differences  
45  
46 of the percentages/numbers of  $PD \geq 4\text{mm}$  and  $6\text{mm}$  in 55-64 years were seen between  
47  
48 hypertensive and normotensive individuals, but not in the percentages/numbers of AL  
49  
50  $\geq 4\text{mm}$  and  $6\text{mm}$  (Table 2 and 3). This is because AL is more related to periodontal  
51  
52  
53  
54  
55  
56  
57  
58  
59  
60

1  
2  
3  
4 attachment damage, while PD is more related to the existing periodontal inflammation.  
5

6 This also indicates that the correlation between periodontitis and hypertension may be  
7  
8  
9 related to the increase of systemic inflammation. Our study adds to the existing  
10  
11 literature concerning oral health parameters associated with systemic outcomes <sup>23, 24</sup>.

12  
13 BOP and PD are the most appropriate clinical measures when the outcome of interest  
14  
15 is an acute disease, whereas AL is more strongly correlated with chronic systemic  
16  
17 conditions <sup>21</sup>. Our findings of an association between hypertension and the severity of  
18  
19 periodontal inflammation (BOP and PD) are consistent with the results of previous  
20  
21 studies <sup>12, 18</sup>. Although the causality of the observed association remains unclear, several  
22  
23 hypotheses have been proposed, including endothelial dysfunction, oxidative stress,  
24  
25 worsening of systemic inflammation in response to bacteremia, and dissemination of  
26  
27 inflammatory mediators from periodontal pockets, particularly BOP <sup>25</sup>. This association  
28  
29 is further supported by the results of a randomized clinical trial that showed short-term  
30  
31 benefits of periodontal therapy on hypertension <sup>26</sup>. Additionally, a recent study  
32  
33 identified oral pathogens associated with high or uncontrolled BP, which supports our  
34  
35 findings <sup>27</sup>.

36  
37  
38 Our finding of an association between the number of missing teeth and hypertension is  
39  
40 consistent with the results reported by Taguchi et al <sup>28</sup>. Missing teeth are indicative of  
41  
42 poor oral health; they presumably were lost because of caries and periodontal disease.  
43  
44  
45 Thus, the absence of several teeth suggests the presence of severe periodontal disease,  
46  
47  
48 caries, or other oral health problems; these may have contributed to the increased risk  
49  
50 of hypertension. This association was strongest in younger adults. There were no  
51  
52  
53  
54  
55  
56  
57  
58  
59  
60

1  
2  
3  
4 residual confounding effects of age that may have affected our study results. Because  
5  
6 of the high prevalence of hypertension in Chinese adults, further studies are needed to  
7  
8 clarify the association between periodontitis and hypertension. Moreover, attention is  
9  
10 needed concerning the prevention and treatment of periodontitis in the general  
11  
12 population.  
13  
14

15  
16  
17 There is minimal knowledge concerning the natural history of the association between  
18  
19 periodontal disease and hypertension <sup>29-33</sup>. A significant linear trend was observed  
20  
21 between the severity of periodontal disease and hypertension in a cross-sectional study  
22  
23 of 3,352 patients with periodontal disease and 902 controls <sup>31</sup>. A recent prospective  
24  
25 cohort study of Japanese individuals demonstrated an increased incidence of  
26  
27 hypertension among participants with periodontal pockets  $\geq 4$  mm at baseline <sup>32</sup>. Our  
28  
29 findings are consistent with the results in a similar study of 6,617 men and 7,377 women  
30  
31 who underwent dental examinations as part of the NHANES III in the USA <sup>34</sup>. In the  
32  
33 present study, after multivariate adjustment, gingival bleeding (BOP) was associated  
34  
35 with an increased risk of hypertension, whereas periodontitis severity (defined using  
36  
37 the 2017 World Workshop on the Classification of Periodontal and Peri-Implant  
38  
39 Diseases and Conditions) and PD were positively associated with hypertension.  
40  
41  
42 Participants with severe periodontal disease (stages III and IV periodontitis) had an  
43  
44 increased risk of hypertension compared with participants who had mild or no  
45  
46 periodontal disease. Furthermore, there was a threshold relationship between severe  
47  
48 periodontal disease and hypertension.  
49  
50  
51  
52  
53  
54  
55  
56  
57

58 To our knowledge, the present study is one of few concerning the association between  
59  
60

1  
2  
3  
4 periodontal disease and hypertension in a large sample of Chinese adults, after  
5  
6 adjustments for potential confounders. The assessment of extent of pathological  
7  
8 condition for periodontal disease is thought to be important, however, the most severe  
9  
10 pathological condition in the oral cavity is assessed in many studies. In this study, the  
11  
12 extent of pathological condition for periodontal disease in the oral cavity was assessed  
13  
14 the percentage of teeth with each periodontal status. In addition, we evaluated several  
15  
16 clinical measures of periodontal disease that allowed analysis of the relationships  
17  
18 between various aspects of periodontal disease and hypertension. We found consistent  
19  
20 associations between PD and hypertension. PD may be indicative of poor oral health  
21  
22 and periodontal inflammation. It was positively associated with hypertension,  
23  
24 suggesting a link between inflammation and hypertension.  
25  
26  
27  
28  
29  
30  
31

32 The main limitation of the present study was that hypertension was self-report and not  
33  
34 based on blood pressure measurements, which is inherent to any epidemiological cohort  
35  
36 study. However, field measurements of blood pressure are regarded as validated tools,  
37  
38 have been used in previous studies<sup>23, 25</sup>, and are considered useful for the analysis of  
39  
40 large samples. Furthermore, although recall and reporting bias could not be excluded,  
41  
42 the results largely reflect real-world clinical practice. First, the self-reported diagnosis  
43  
44 was based on a face-to-face interview to ensure the validity and accuracy of the  
45  
46 information. Second, the reliability of the study results is supported by data from the  
47  
48 China Hypertension Survey (2012-2015)<sup>35</sup>, which showed an overall hypertension  
49  
50 prevalence of 23.2% in the Chinese adult population; this prevalence is similar to the  
51  
52 prevalence observed in our study (23.9%).  
53  
54  
55  
56  
57  
58  
59  
60



1  
2  
3  
4 In summary, our epidemiological analysis revealed an association between  
5  
6 periodontitis and hypertension. We collected high-quality, large-scale clinical data  
7  
8 related to periodontal disease and hypertension. We also collected detailed information  
9  
10 regarding potential confounders, including variables that reflect health behavior (e.g.,  
11  
12 flossing). However, there was no strong evidence of a causal relationship. Future  
13  
14 studies should be conducted to improve the understanding of the underlying  
15  
16 mechanisms and interactions between periodontitis and hypertension, which will  
17  
18 further strengthen collaborations between the dental and medical communities.  
19  
20 Preventive measures for periodontal disease in oral health promotion programs should  
21  
22 be emphasised to improve systemic health outcomes.  
23  
24  
25  
26  
27  
28  
29  
30  
31  
32

### Contributorship statement

33  
34  
35 YZ is the major contributor in writing the manuscript and participates in data analysis  
36  
37 and collation. JJ participates in data analysis and collation. WJ participates in writing  
38  
39 the manuscript. XF, BT, DH, HL, BW, CW, SZ, XL, WR, WW, XW, and YS conceive  
40  
41 the study design and draft the protocol. HM conceives the study design, drafts the  
42  
43 protocol, and revise the manuscript. All authors read and approved the final manuscript.  
44  
45  
46  
47  
48  
49  
50

### Competing interests

51  
52  
53 The authors declare that they have no conflict of interests.  
54  
55  
56  
57

### Funding

1  
2  
3  
4 This study was supported by "the Public Science and Technology Research Funds  
5  
6 Project (2015) - the Fourth National Oral Health Survey (201502002)" and Peking  
7  
8 University School and Hospital of Stomatology (PKUSS20180205).  
9  
10

### 11 12 13 14 **Data sharing statement**

15  
16  
17 This study is based on the data of the Fourth National Oral Health Survey of China  
18  
19 (2015-2016), which was provided by the Chinese Stomatological Association.  
20  
21  
22  
23  
24

### 25 **Ethics approval**

26  
27 The study protocol was approved by the Ethics Committee of the Chinese  
28  
29 Stomatological Association (approval no.: 2014-003). Written informed consent was  
30  
31 obtained from all participants. This study was performed in accordance with the 2013  
32  
33 revision of the Declaration of Helsinki.  
34  
35  
36  
37  
38  
39

### 40 **Reference**

- 41  
42  
43 1. Williams B, Mancia G, Spiering W, Agabiti Rosei E, Azizi M, Burnier M, et al.  
44  
45 2018 ESC/ESH Guidelines for the management of arterial hypertension: The  
46  
47 Task Force for the management of arterial hypertension of the European Society  
48  
49 of Cardiology and the European Society of Hypertension: The Task Force for  
50  
51 the management of arterial hypertension of the European Society of Cardiology  
52  
53 and the European Society of Hypertension. *J Hypertens* 2018; 36 (10): 1953-  
54  
55 2041. doi: 10.1097/HJH.0000000000001940.  
56  
57 2. Mancia G, Fagard R, Narkiewicz K, Redon J, Zanchetti A, Bohm M, et al. 2013  
58  
59 ESH/ESC Practice Guidelines for the Management of Arterial Hypertension.  
60  
*Blood Press* 2014; 23 (1): 3-16. doi: 10.3109/08037051.2014.868629.

- 1  
2  
3  
4 3. Joffres M, Falaschetti E, Gillespie C, Robitaille C, Loustalot F, Poulter N, et al.  
5  
6 Hypertension prevalence, awareness, treatment and control in national surveys  
7  
8 from England, the USA and Canada, and correlation with stroke and ischaemic  
9  
10 heart disease mortality: a cross-sectional study. *BMJ Open* 2013; 3 (8): e003423.  
11  
12 doi: 10.1136/bmjopen-2013-003423.
- 13  
14 4. Carretero OA, Oparil S. Essential hypertension. Part I: definition and etiology.  
15  
16 *Circulation* 2000; 101 (3): 329-335. doi: 10.1161/01.cir.101.3.329.
- 17  
18 5. Czopek A, Moorhouse R, Guyonnet L, Farrah T, Lenoir O, Owen E, et al. A  
19  
20 novel role for myeloid endothelin-B receptors in hypertension. *Eur Heart J* 2019;  
21  
22 40 (9): 768-784. doi: 10.1093/eurheartj/ehy881.
- 23  
24 6. Drummond GR, Vinh A, Guzik TJ, Sobey CG. Immune mechanisms of  
25  
26 hypertension. *Nat Rev Immunol* 2019; 19 (8): 517-532. doi: 10.1038/s41577-  
27  
28 019-0160-5.
- 29  
30 7. Chapple IL, Genco R, Working group 2 of joint EFPAAPw. Diabetes and  
31  
32 periodontal diseases: consensus report of the Joint EFP/AAP Workshop on  
33  
34 Periodontitis and Systemic Diseases. *J Clin Periodontol* 2013; 40 Suppl 14  
35  
36 S106-112. doi: 10.1111/jcpe.12077.
- 37  
38 8. Lu HX, Tao DY, Lo ECM, Li R, Wang X, Tai BJ, et al. The 4th National Oral  
39  
40 Health Survey in the Mainland of China: Background and Methodology. *Chin*  
41  
42 *J Dent Res* 2018; 21 (3): 161-165. doi: 10.3290/j.cjdr.a41079.
- 43  
44 9. Sun HY, Jiang H, Du MQ, Wang X, Feng XP, Hu Y, et al. The Prevalence and  
45  
46 Associated Factors of Periodontal Disease among 35 to 44-year-old Chinese  
47  
48 Adults in the 4th National Oral Health Survey. *Chin J Dent Res* 2018; 21 (4):  
49  
50 241-247. doi: 10.3290/j.cjdr.a41082.
- 51  
52 10. Tonetti MS, D'Aiuto F, Nibali L, Donald A, Storry C, Parkar M, et al. Treatment  
53  
54 of periodontitis and endothelial function. *N Engl J Med* 2007; 356 (9): 911-920.  
55  
56 doi: 10.1056/NEJMoa063186.
- 57  
58 11. Munoz Aguilera E, Suvan J, Buti J, Czesnikiewicz-Guzik M, Barbosa Ribeiro  
59  
60 A, Orlandi M, et al. Periodontitis is associated with hypertension: a systematic  
review and meta-analysis. *Cardiovasc Res* 2020; 116 (1): 28-39. doi:

- 1  
2  
3  
4 10.1093/cvr/cvz201.
- 5  
6 12. Pietropaoli D, Del Pinto R, Ferri C, Wright JT, Jr., Giannoni M, Ortu E, et al.  
7  
8 Poor Oral Health and Blood Pressure Control Among US Hypertensive Adults.  
9  
10 Hypertension 2018; 72 (6): 1365-1373. doi:  
11  
12 10.1161/HYPERTENSIONAHA.118.11528.
- 13  
14 13. Boos CJ, Lip GY. Is hypertension an inflammatory process? *Curr Pharm Des*  
15  
16 2006; 12 (13): 1623-1635. doi: 10.2174/138161206776843313.
- 17  
18 14. Li JJ. Inflammation in hypertension: primary evidence. *Chin Med J (Engl)* 2006;  
19  
20 119 (14): 1215-1221.
- 21  
22 15. Li JJ, Fang CH, Hui RT. Is hypertension an inflammatory disease? *Med*  
23  
24 *Hypotheses* 2005; 64 (2): 236-240. doi: 10.1016/j.mehy.2004.06.017.
- 25  
26 16. Savoia C, Schiffrin EL. Inflammation in hypertension. *Curr Opin Nephrol*  
27  
28 *Hypertens* 2006; 15 (2): 152-158. doi: 10.1097/01.mnh.0000203189.57513.76.
- 29  
30 17. Tonetti MS, Greenwell H, Kornman KS. Staging and grading of periodontitis:  
31  
32 Framework and proposal of a new classification and case definition. *J*  
33  
34 *Periodontol* 2018 Jun;89 Suppl 1:S159-S172. doi: 10.1002/JPER.18-0006.
- 35  
36 18. Kumins NH, King AH, Ambani RN, Thomas JP, Bose S, Shishehbor MH, Li J,  
37  
38 Wong VL, Harth KC, Cho JS, Kashyap VS. Paclitaxel-coated peripheral artery  
39  
40 devices are not associated with increased mortality. *J Vasc Surg* 2020  
41  
42 Sep;72(3):968-976. doi: 10.1016/j.jvs.2019.10.100. Epub 2020 Jan 6. PMID:  
43  
44 31917036.
- 45  
46 19. Jiao J, Zhang L, Meng HX, Shi D, Lu RF, Xu L, Feng XH, Cao ZQ. Clinical  
47  
48 performance of non-surgical periodontal therapy in a large Chinese population  
49  
50 with generalized aggressive periodontitis. *J Clin Periodontol* 2018  
51  
52 Oct;45(10):1184-1197. doi: 10.1111/jcpe.12981. Epub 2018 Aug 21. PMID:  
53  
54 29974483.
- 55  
56 20. Martin-Cabezas R, Seelam N, Petit C, Agossa K, Gaertner S, Tenenbaum H, et  
57  
58 al. Association between periodontitis and arterial hypertension: A systematic  
59  
60 review and meta-analysis. *Am Heart J* 2016; 180 98-112. doi:  
10.1016/j.ahj.2016.07.018.

- 1  
2  
3  
4 21. Muñoz Aguilera E, Suvan J, Buti J, Czesnikiewicz-Guzik M, Barbosa Ribeiro  
5 A, Orlandi M, Guzik TJ, Hingorani AD, Nart J, D'Aiuto F. Periodontitis is  
6 associated with hypertension: a systematic review and meta-analysis.  
7 *Cardiovasc Res.* 2020 Jan 1;116(1):28-39. doi: 10.1093/cvr/cvz201. PMID:  
8 31549149.  
9  
10  
11  
12  
13 22. Chobanian AV, Bakris GL, Black HR, Cushman WC, Green LA, Izzo JL, Jr.,  
14 et al. Seventh report of the Joint National Committee on Prevention, Detection,  
15 Evaluation, and Treatment of High Blood Pressure. *Hypertension* 2003; 42 (6):  
16 1206-1252. doi: 10.1161/01.HYP.0000107251.49515.c2.  
17  
18  
19  
20  
21 23. Beck JD, Offenbacher S. Relationships among clinical measures of periodontal  
22 disease and their associations with systemic markers. *Ann Periodontol* 2002; 7  
23 (1): 79-89. doi: 10.1902/annals.2002.7.1.79.  
24  
25  
26  
27 24. Demmer RT, Kocher T, Schwahn C, Volzke H, Jacobs DR, Jr., Desvarieux M.  
28 Refining exposure definitions for studies of periodontal disease and systemic  
29 disease associations. *Community Dent Oral Epidemiol* 2008; 36 (6): 493-502.  
30 doi: 10.1111/j.1600-0528.2008.00435.x.  
31  
32  
33  
34  
35 25. Macedo Paizan ML, Vilela-Martin JF. Is there an association between  
36 periodontitis and hypertension? *Curr Cardiol Rev* 2014; 10 (4): 355-361. doi:  
37 10.2174/1573403x10666140416094901.  
38  
39  
40  
41 26. Czesnikiewicz-Guzik M, Osmenda G, Siedlinski M, Nosalski R, Pelka P,  
42 Nowakowski D, et al. Causal association between periodontitis and  
43 hypertension: evidence from Mendelian randomization and a randomized  
44 controlled trial of non-surgical periodontal therapy. *Eur Heart J* 2019; 40 (42):  
45 3459-3470. doi: 10.1093/eurheartj/ehz646.  
46  
47  
48  
49  
50  
51 27. Pietropaoli D, Del Pinto R, Ferri C, Ortu E, Monaco A. Definition of  
52 hypertension-associated oral pathogens in NHANES. *J Periodontol* 2019; 90 (8):  
53 866-876. doi: 10.1002/JPER.19-0046.  
54  
55  
56  
57 28. Taguchi A, Sanada M, Sueti Y, Ohtsuka M, Lee K, Tanimoto K, et al. Tooth  
58 loss is associated with an increased risk of hypertension in postmenopausal  
59 women. *Hypertension* 2004; 43 (6): 1297-1300. doi:  
60

- 1  
2  
3  
4 10.1161/01.HYP.0000128335.45571.ce.  
5  
6 29. D'Aiuto F, Parkar M, Nibali L, Suvan J, Lessem J, Tonetti MS. Periodontal  
7 infections cause changes in traditional and novel cardiovascular risk factors:  
8 results from a randomized controlled clinical trial. *Am Heart J* 2006; 151 (5):  
9 977-984. doi: 10.1016/j.ahj.2005.06.018.  
10  
11  
12  
13 30. D'Aiuto F, Sabbah W, Netuveli G, Donos N, Hingorani AD, Deanfield J, et al.  
14 Association of the metabolic syndrome with severe periodontitis in a large U.S.  
15 population-based survey. *J Clin Endocrinol Metab* 2008; 93 (10): 3989-3994.  
16 doi: 10.1210/jc.2007-2522.  
17  
18  
19  
20  
21 31. Holmlund A, Holm G, Lind L. Severity of periodontal disease and number of  
22 remaining teeth are related to the prevalence of myocardial infarction and  
23 hypertension in a study based on 4,254 subjects. *J Periodontol* 2006; 77 (7):  
24 1173-1178. doi: 10.1902/jop.2006.050233.  
25  
26  
27  
28  
29 32. Morita T, Yamazaki Y, Mita A, Takada K, Seto M, Nishinoue N, et al. A cohort  
30 study on the association between periodontal disease and the development of  
31 metabolic syndrome. *J Periodontol* 2010; 81 (4): 512-519. doi:  
32 10.1902/jop.2010.090594.  
33  
34  
35  
36  
37 33. Rivas-Tumanyan S, Spiegelman D, Curhan GC, Forman JP, Joshipura KJ.  
38 Periodontal disease and incidence of hypertension in the health professionals  
39 follow-up study. *Am J Hypertens* 2012; 25 (7): 770-776. doi:  
40 10.1038/ajh.2012.32.  
41  
42  
43  
44  
45 34. Dye BA, Barker LK, Selwitz RH, Lewis BG, Wu T, Fryar CD, et al. Overview  
46 and quality assurance for the National Health and Nutrition Examination Survey  
47 (NHANES) oral health component, 1999-2002. *Community Dent Oral*  
48 *Epidemiol* 2007; 35 (2): 140-151. doi: 10.1111/j.1600-0528.2007.00310.x.  
49  
50  
51  
52  
53 35. Wang Z, Chen Z, Zhang L, Wang X, Hao G, Zhang Z, et al. Status of  
54 Hypertension in China: Results From the China Hypertension Survey, 2012-  
55 2015. *Circulation* 2018; 137 (22): 2344-2356. doi:  
56 10.1161/CIRCULATIONAHA.117.032380.  
57  
58  
59  
60

Table S1. Number of missing teeth by gender, age groups and smoking status

| Group          | NT   |         | HT   |         | p*     |
|----------------|------|---------|------|---------|--------|
|                | Mean | 95% CI  | Mean | 95% CI  |        |
| Male           | 3.0  | 2.9~3.2 | 4.5  | 4.2~4.8 | <0.001 |
| Female         | 2.8  | 2.7~3.0 | 4.2  | 4.0~4.5 | <0.001 |
| 35-44 years    | 0.7  | 0.7~0.7 | 1.0  | 0.7~1.3 | 0.024  |
| 55-64 years    | 3.3  | 3.1~3.4 | 3.4  | 3.2~3.7 | 0.305  |
| 65-74 years    | 6.0  | 5.8~6.3 | 5.7  | 5.4~6.0 | 0.104  |
| Current smoker | 2.7  | 2.6~2.8 | 4.2  | 3.9~4.4 | <0.001 |
| Non-smoker     | 3.3  | 3.1~3.5 | 4.3  | 3.9~4.7 | <0.001 |
| Former smoker  | 3.5  | 3.2~3.9 | 5.3  | 4.7~6.0 | <0.001 |
| Total          | 2.9  | 2.8~3.0 | 4.4  | 4.2~4.6 | <0.001 |

HT = Hypertension; NT = Normotension;

\* significant difference by Student's t test.

STROBE Statement—Checklist of items that should be included in reports of *cross-sectional studies*

|                              | Item No                                                                            | Recommendation                                                                                                                                                                                    | Page No |
|------------------------------|------------------------------------------------------------------------------------|---------------------------------------------------------------------------------------------------------------------------------------------------------------------------------------------------|---------|
| <b>Title and abstract</b>    | 1                                                                                  | (a) Indicate the study's design with a commonly used term in the title or the abstract                                                                                                            | 1       |
|                              |                                                                                    | (b) Provide in the abstract an informative and balanced summary of what was done and what was found                                                                                               | 3       |
| <b>Introduction</b>          |                                                                                    |                                                                                                                                                                                                   |         |
| Background/rationale         | 2                                                                                  | Explain the scientific background and rationale for the investigation being reported                                                                                                              | 4       |
| Objectives                   | 3                                                                                  | State specific objectives, including any prespecified hypotheses                                                                                                                                  | 5       |
| <b>Methods</b>               |                                                                                    |                                                                                                                                                                                                   |         |
| Study design                 | 4                                                                                  | Present key elements of study design early in the paper                                                                                                                                           | 5       |
| Setting                      | 5                                                                                  | Describe the setting, locations, and relevant dates, including periods of recruitment, exposure, follow-up, and data collection                                                                   | 6-8     |
| Participants                 | 6                                                                                  | (a) Give the eligibility criteria, and the sources and methods of selection of participants                                                                                                       | 5       |
| Variables                    | 7                                                                                  | Clearly define all outcomes, exposures, predictors, potential confounders, and effect modifiers. Give diagnostic criteria, if applicable                                                          | 6-8     |
| Data sources/<br>measurement | 8*                                                                                 | For each variable of interest, give sources of data and details of methods of assessment (measurement). Describe comparability of assessment methods if there is more than one group              | 7       |
| Bias                         | 9                                                                                  | Describe any efforts to address potential sources of bias                                                                                                                                         | 7       |
| Study size                   | 10                                                                                 | Explain how the study size was arrived at                                                                                                                                                         | 5       |
| Quantitative variables       | 11                                                                                 | Explain how quantitative variables were handled in the analyses. If applicable, describe which groupings were chosen and why                                                                      | 7       |
| Statistical methods          | 12                                                                                 | (a) Describe all statistical methods, including those used to control for confounding                                                                                                             | 8-9     |
|                              |                                                                                    | (b) Describe any methods used to examine subgroups and interactions                                                                                                                               | 8-9     |
|                              | (c) Explain how missing data were addressed                                        | 8-9                                                                                                                                                                                               |         |
|                              | (d) If applicable, describe analytical methods taking account of sampling strategy | NA                                                                                                                                                                                                |         |
|                              | (e) Describe any sensitivity analyses                                              | NA                                                                                                                                                                                                |         |
| <b>Results</b>               |                                                                                    |                                                                                                                                                                                                   |         |
| Participants                 | 13*                                                                                | (a) Report numbers of individuals at each stage of study—eg numbers potentially eligible, examined for eligibility, confirmed eligible, included in the study, completing follow-up, and analysed | 9       |
|                              |                                                                                    | (b) Give reasons for non-participation at each stage                                                                                                                                              | 9       |
|                              |                                                                                    | (c) Consider use of a flow diagram                                                                                                                                                                | NA      |
| Descriptive data             | 14*                                                                                | (a) Give characteristics of study participants (eg demographic, clinical, social) and information on exposures and potential confounders                                                          | 9-10    |
|                              |                                                                                    | (b) Indicate number of participants with missing data for each variable of interest                                                                                                               | NA      |
| Outcome data                 | 15*                                                                                | Report numbers of outcome events or summary measures                                                                                                                                              | 10-13   |



1  
2  
3  
4  
5  
6  
7  
8  
9  
10  
11  
12  
13  
14  
15  
16  
17  
18  
19  
20  
21  
22  
23  
24  
25  
26  
27  
28  
29  
30  
31  
32  
33  
34  
35  
36  
37  
38  
39  
40  
41  
42  
43  
44  
45  
46  
47  
48  
49  
50  
51  
52  
53  
54  
55  
56  
57  
58  
59  
60

|                          |    |                                                                                                                                                                                                              |       |
|--------------------------|----|--------------------------------------------------------------------------------------------------------------------------------------------------------------------------------------------------------------|-------|
| Main results             | 16 | (a) Give unadjusted estimates and, if applicable, confounder-adjusted estimates and their precision (eg, 95% confidence interval). Make clear which confounders were adjusted for and why they were included | 12-13 |
|                          |    | (b) Report category boundaries when continuous variables were categorized                                                                                                                                    | NA    |
|                          |    | (c) If relevant, consider translating estimates of relative risk into absolute risk for a meaningful time period                                                                                             | NA    |
| Other analyses           | 17 | Report other analyses done—eg analyses of subgroups and interactions, and sensitivity analyses                                                                                                               | NA    |
| <b>Discussion</b>        |    |                                                                                                                                                                                                              |       |
| Key results              | 18 | Summarise key results with reference to study objectives                                                                                                                                                     | 13-14 |
| Limitations              | 19 | Discuss limitations of the study, taking into account sources of potential bias or imprecision. Discuss both direction and magnitude of any potential bias                                                   | 18    |
| Interpretation           | 20 | Give a cautious overall interpretation of results considering objectives, limitations, multiplicity of analyses, results from similar studies, and other relevant evidence                                   | 14-17 |
| Generalisability         | 21 | Discuss the generalisability (external validity) of the study results                                                                                                                                        | 17    |
| <b>Other information</b> |    |                                                                                                                                                                                                              |       |
| Funding                  | 22 | Give the source of funding and the role of the funders for the present study and, if applicable, for the original study on which the present article is based                                                | 19    |

\*Give information separately for exposed and unexposed groups.

**Note:** An Explanation and Elaboration article discusses each checklist item and gives methodological background and published examples of transparent reporting. The STROBE checklist is best used in conjunction with this article (freely available on the Web sites of PLoS Medicine at <http://www.plosmedicine.org/>, Annals of Internal Medicine at <http://www.annals.org/>, and Epidemiology at <http://www.epidem.com/>). Information on the STROBE Initiative is available at [www.strobe-statement.org](http://www.strobe-statement.org).

# BMJ Open

## Association between Periodontitis and Hypertension: Cross-Sectional Survey from the Fourth National Oral Health Survey of China (2015-2016)

|                                 |                                                                                                                                                                                                                                                                                                                                                                                                                                                                                                                                                                                                                                                                                                                                                                                                                                                                                                                                                                                                                                                                                                                                                                        |
|---------------------------------|------------------------------------------------------------------------------------------------------------------------------------------------------------------------------------------------------------------------------------------------------------------------------------------------------------------------------------------------------------------------------------------------------------------------------------------------------------------------------------------------------------------------------------------------------------------------------------------------------------------------------------------------------------------------------------------------------------------------------------------------------------------------------------------------------------------------------------------------------------------------------------------------------------------------------------------------------------------------------------------------------------------------------------------------------------------------------------------------------------------------------------------------------------------------|
| Journal:                        | <i>BMJ Open</i>                                                                                                                                                                                                                                                                                                                                                                                                                                                                                                                                                                                                                                                                                                                                                                                                                                                                                                                                                                                                                                                                                                                                                        |
| Manuscript ID                   | bmjopen-2022-068724.R3                                                                                                                                                                                                                                                                                                                                                                                                                                                                                                                                                                                                                                                                                                                                                                                                                                                                                                                                                                                                                                                                                                                                                 |
| Article Type:                   | Original research                                                                                                                                                                                                                                                                                                                                                                                                                                                                                                                                                                                                                                                                                                                                                                                                                                                                                                                                                                                                                                                                                                                                                      |
| Date Submitted by the Author:   | 07-Mar-2023                                                                                                                                                                                                                                                                                                                                                                                                                                                                                                                                                                                                                                                                                                                                                                                                                                                                                                                                                                                                                                                                                                                                                            |
| Complete List of Authors:       | Zhan, Yalin; Peking University Hospital of Stomatology, First Clinical Division<br>Jiao, Jian; Peking University Hospital of Stomatology, Department of Periodontology<br>Jing, Wu-di; Peking University Hospital of Stomatology<br>Feng, Xiping; Shanghai Jiao Tong University School of Medicine Affiliated Ninth People's Hospital, Department of Preventive Dentistry<br>Tai, Baojun; Wuhan University, School & Hospital of Stomatology<br>Hu, Deyu; Sichuan University, West China School of Stomatology<br>Lin, Huan-cai; Sun Yat-Sen University, Guanghua School of Stomatology, Hospital of Stomatology<br>Wang, Bo; Peking University Hospital of Stomatology<br>Wang, Chunxiao; Chinese Center for Disease Control and Prevention<br>Zheng, Shuguo; Peking University Hospital of Stomatology<br>Liu, Xuenan; Peking University Hospital of Stomatology<br>Rong, Wensheng; Peking University Hospital of Stomatology<br>Wang, Weijian; Peking University Hospital of Stomatology<br>Wang, Xing; Peking University Hospital of Stomatology<br>Si, Yan; Peking University Hospital of Stomatology<br>Meng, Huanxin; Peking University Hospital of Stomatology |
| <b>Primary Subject Heading</b>: | Dentistry and oral medicine                                                                                                                                                                                                                                                                                                                                                                                                                                                                                                                                                                                                                                                                                                                                                                                                                                                                                                                                                                                                                                                                                                                                            |
| Secondary Subject Heading:      | Infectious diseases, Cardiovascular medicine                                                                                                                                                                                                                                                                                                                                                                                                                                                                                                                                                                                                                                                                                                                                                                                                                                                                                                                                                                                                                                                                                                                           |
| Keywords:                       | Hypertension < CARDIOLOGY, ORAL MEDICINE, Epidemiology < TROPICAL MEDICINE, Public health < INFECTIOUS DISEASES                                                                                                                                                                                                                                                                                                                                                                                                                                                                                                                                                                                                                                                                                                                                                                                                                                                                                                                                                                                                                                                        |
|                                 |                                                                                                                                                                                                                                                                                                                                                                                                                                                                                                                                                                                                                                                                                                                                                                                                                                                                                                                                                                                                                                                                                                                                                                        |

SCHOLARONE™  
Manuscripts



I, the Submitting Author has the right to grant and does grant on behalf of all authors of the Work (as defined in the below author licence), an exclusive licence and/or a non-exclusive licence for contributions from authors who are: i) UK Crown employees; ii) where BMJ has agreed a CC-BY licence shall apply, and/or iii) in accordance with the terms applicable for US Federal Government officers or employees acting as part of their official duties; on a worldwide, perpetual, irrevocable, royalty-free basis to BMJ Publishing Group Ltd ("BMJ") its licensees and where the relevant Journal is co-owned by BMJ to the co-owners of the Journal, to publish the Work in this journal and any other BMJ products and to exploit all rights, as set out in our [licence](#).

The Submitting Author accepts and understands that any supply made under these terms is made by BMJ to the Submitting Author unless you are acting as an employee on behalf of your employer or a postgraduate student of an affiliated institution which is paying any applicable article publishing charge ("APC") for Open Access articles. Where the Submitting Author wishes to make the Work available on an Open Access basis (and intends to pay the relevant APC), the terms of reuse of such Open Access shall be governed by a Creative Commons licence – details of these licences and which [Creative Commons](#) licence will apply to this Work are set out in our licence referred to above.

Other than as permitted in any relevant BMJ Author's Self Archiving Policies, I confirm this Work has not been accepted for publication elsewhere, is not being considered for publication elsewhere and does not duplicate material already published. I confirm all authors consent to publication of this Work and authorise the granting of this licence.

1  
2  
3  
4  
5 **Association between Periodontitis and Hypertension: Cross-Sectional Survey**  
6  
7 **from the Fourth National Oral Health Survey of China (2015-2016)**  
8

9  
10 **Running title: Association between periodontitis and hypertension**  
11  
12

13  
14  
15 Ya-lin Zhan<sup>1\*</sup>, PhD, Jian Jiao<sup>1\*</sup>, DDS, Wu-di Jing<sup>1</sup>, DDS., Xi-ping Feng<sup>2</sup>, PhD, Bao-  
16  
17 jun Tai<sup>3</sup>, PhD, De-yu Hu<sup>4</sup>, PhD, Huan-cai Lin<sup>5</sup>, PhD, Bo Wang<sup>6</sup>,EMBA, Chun-xiao  
18  
19 Wang<sup>7</sup>, PhD, Shu-guo Zheng<sup>8</sup>,PhD, Xue-nan Liu<sup>8</sup>, PhD, Wen-sheng Rong<sup>8</sup>, PhD, Wei-  
20  
21 jian Wang<sup>8</sup>, PhD, Xing Wang<sup>6</sup>, PhD, Yan Si<sup>8</sup>, PhD, Huan-xin Meng<sup>1</sup>, PhD,<sup>†</sup>  
22  
23  
24  
25  
26  
27

28  
29 <sup>1</sup> Department of Periodontology, Peking University School and Hospital of  
30  
31 Stomatology, National Engineering Laboratory for Digital and Material Technology of  
32  
33 Stomatology, Beijing Key Laboratory of Digital Stomatology, Beijing, P.R. China  
34  
35

36  
37 <sup>2</sup> Shanghai Ninth People's Hospital, Shanghai Jiao Tong University School of Medicine,  
38  
39 Shanghai, P.R. China.

40  
41 <sup>3</sup> School & Hospital of Stomatology, Wuhan University, Wuhan, P.R. China.  
42  
43

44  
45 <sup>4</sup> West China School of Stomatology, Sichuan University, Chengdu, P.R. China.  
46  
47

48  
49 <sup>5</sup> Guanghua School of Stomatology, Hospital of Stomatology, Sun Yat-sen University,  
50  
51 Guangzhou, P.R. China.

52  
53 <sup>6</sup> Chinese Stomatological Association, Beijing, P.R. China.

54  
55 <sup>7</sup> Chinese Center for Disease Control and Prevention, Beijing, P.R. China.

56  
57 <sup>8</sup> Department of Preventive Dentistry, Peking University School and Hospital of  
58  
59 Stomatology, National Engineering Laboratory for Digital and Material Technology of  
60

1  
2  
3  
4 Stomatology, Beijing Key Laboratory of Digital Stomatology, Beijing, P.R. China  
5  
6  
7  
8

9 \*The two authors contributed equally to this work.  
10

11 † corresponding author  
12  
13  
14  
15  
16

17 **Corresponding author:** Huanxin Meng  
18

19 Department of Periodontology, Peking University School and Hospital of Stomatology,  
20  
21 National Engineering Laboratory for Digital and Material Technology of Stomatology,  
22  
23 Beijing Key Laboratory of Digital Stomatology Zhongguancun Nandajie 22, Haidian  
24  
25 District, 100081, Beijing, P.R.China  
26  
27  
28

29  
30 Email: [kqhxmeng@126.com](mailto:kqhxmeng@126.com)  
31

32  
33 Tel: +86-010-82195522; Fax: +86-010-82195522.  
34  
35  
36  
37

## 38 **ABSTRACT**

39  
40 **Objectives** To evaluate the association between periodontitis severity and hypertension  
41  
42 based on Chinese epidemiological data.  
43  
44

45 **Design** This cross-sectional survey enrolled adults from the Fourth National Oral  
46  
47 Health Survey of China (2015-2016).  
48  
49

50 **Setting** The data were obtained from the Fourth National Oral Health Survey of China  
51  
52 (2015-2016).  
53  
54

55 **Participants** The study included individuals aged 35-44 years (n = 4,409), 55-64 years  
56  
57 (n = 4,568), and 65-74 years (n = 4,218).  
58  
59  
60

1  
2  
3  
4 **Primary and secondary outcome measures** Periodontal status, defined on the basis  
5  
6 of the 2017 classification scheme, and periodontal parameters (e.g., bleeding on  
7  
8 probing [BOP]) were compared between hypertensive and normotensive individuals.  
9  
10 Smoothed scatterplots were constructed to demonstrate the associations of periodontal  
11  
12 parameters and periodontal status with hypertension.  
13  
14  
15

16  
17 **Results** Severe periodontitis (stages III and IV) was present in 41.4% and 28.0% of  
18  
19 hypertensive and normotensive individuals, respectively ( $p < 0.001$ ). The prevalence of  
20  
21 severe periodontitis was higher in hypertensive individuals than that in normotensive  
22  
23 individuals among participants aged 35-44 years (18.0% vs. 10.1%,  $p < 0.001$ ) and 55-  
24  
25 64 years (40.2% vs. 36.7%,  $p = 0.035$ ), but not in participants aged 65-74 years (46.4%  
26  
27 vs. 45.1%,  $p = 0.429$ ). Therefore, the difference in periodontal status between  
28  
29 hypertensive and normotensive individuals decreased with age. There were higher  
30  
31 prevalences of BOP, probing depth [PD]  $\geq 4$  mm, and PD  $\geq 6$  mm in hypertensive  
32  
33 individuals than in normotensive individuals (52.1% vs. 49.2%, 19.6% vs. 14.7%, and  
34  
35 1.8% vs. 1.1%, respectively). Periodontitis severity and the proportion of teeth with PD  
36  
37  $\geq 4$  or  $\geq 6$  mm were positively associated with hypertension.  
38  
39  
40  
41  
42  
43  
44

45 **Conclusion** Periodontitis is associated with hypertension in Chinese adults.  
46  
47 Hypertension prevalence increased with periodontitis severity, particularly among  
48  
49 young participants. Accordingly, it is necessary to improve the education, awareness of  
50  
51 periodontal treatment, and preventive management among individuals at risk of  
52  
53 hypertension, particularly in the younger population.  
54  
55  
56  
57  
58  
59  
60

**Key Words:** Hypertension, oral medicine, epidemiology, public health.

### **Strengths and limitations of this study**

- The participant group was based on a large-scale national survey in China, and the sample size of the study was relatively large.
- Periodontitis was diagnosed in accordance with the classification proposed at the 2017 World Workshop.
- Hypertension was self-reported and not based on blood pressure measurements.

### **INTRODUCTION**

Hypertension, which affects 45% of the global population, is the most common cardiovascular diseases (CVDs) worldwide.<sup>1,2</sup> It is defined as systolic or diastolic blood pressure (BP) of  $\geq 140$  or  $\geq 90$  mmHg, respectively. Hypertension is frequently poorly controlled and untreated.<sup>3</sup> It is a complex disease with multiple causes and a major risk factor for CVDs.<sup>4</sup> Oxidative stress, endothelial dysfunction, and inflammation are associated with the development of hypertension.<sup>5</sup> The results of experimental and clinical studies suggest that inflammation has a major role in the development of hypertension.<sup>6</sup> Chronic inflammation predisposes to the development of pro-hypertensive inflammation.

Periodontal disease, an immune-inflammatory reaction to plaque biofilms,<sup>7</sup> has received substantial attention because of its association with CVDs. The Global Burden of Disease Study revealed that periodontitis was the sixth most prevalent disease

1  
2  
3  
4 worldwide. Periodontitis affects 743 million people worldwide (11.2% of the global  
5  
6 population); the prevalence is higher in China than in other countries. The Fourth  
7  
8 National Oral Health Survey of China showed that 90.9% of individuals aged 35-44  
9  
10 years had periodontal disease.<sup>8 9</sup> The low-grade inflammation associated with  
11  
12 periodontitis has harmful effects on endothelial function, which may result in  
13  
14 hypertension.<sup>10</sup> A recent study revealed that individuals with periodontitis have  
15  
16 increased risks of hypertension and antihypertensive treatment failure.<sup>11 12</sup> Previous  
17  
18 studies have suggested that dental treatment can improve blood pressure, although the  
19  
20 findings have been inconclusive and further studies are needed.<sup>13-16</sup>  
21  
22  
23  
24  
25  
26

27 Periodontitis and hypertension are major health problems, and their association  
28  
29 received considerable public health attention. Therefore, we evaluated the relationship  
30  
31 between periodontitis and hypertension based on data from the Fourth National Oral  
32  
33 Health Survey of China. We sought to determine whether individuals with periodontitis  
34  
35 are more likely to have hypertension than are individuals who do not have periodontitis  
36  
37 and whether periodontitis severity is associated with hypertension.  
38  
39  
40  
41  
42  
43  
44

## 45 **MATERIALS AND METHODS**

### 46 *Study design and sample*

47  
48  
49 This cross-sectional study obtained data from adult participants of the Fourth National  
50  
51 Oral Health Survey of China (2015-2016).<sup>8</sup> The planned sample size was 4,230 each  
52  
53 for the age groups 35-44, 55-64 and 65-74 years. We excluded data from edentulous  
54  
55 participants and from those without complete information. Finally, 13,195 individuals  
56  
57  
58  
59  
60



1  
2  
3  
4 were included (4,409, 4,568, and 4,218 individuals aged 35-44, 55-64, and 65-74 years,  
5  
6 respectively).

### 9 ***Data collection***

10 We collected data related to oral examination findings and questionnaire answers.

#### 14 1. *Periodontal examination*

16 Periodontal examinations were performed using a community periodontal index probe.

17 A full-mouth examination was performed, during which the probe was walked along

18 the gingival crevices using a force of  $\leq 20$  g to assess bleeding on probing (BOP), the

19 presence of calculus, probing depth (PD), and attachment loss (AL). For each parameter,

20 each tooth was scored according to the condition of the most severely affected site.

21 Training programs were conducted for examiner calibration before the survey. The

22 reliability of the results was assessed using kappa values; kappa values for periodontal

23 pocket depth were  $\geq 0.6$ . Additionally, 5% of the participants were randomly selected

24 for assessment of inter-examiner reproducibility. The kappa values for all age-groups

25 were 0.76-0.80.

#### 29 ***Patient and public involvement***

30 The study participants and the public were not involved in the design, conduct,

31 reporting, or dissemination plans of our research.

#### 32 ***Study parameters***

33 Supragingival and subgingival calculus were identified by visual examination and

34 probing, respectively (0 = absent, 1 = present, 9 = tooth excluded, and X = tooth not

35 present). PD was recorded as 0 (1–3 mm), 1 (4–5 mm), 2 ( $\geq 6$  mm), 9 (tooth excluded),

1  
2  
3  
4 or X (tooth not present). BOP was recorded as 0 (absent), 1 (present), 9 (tooth  
5  
6 excluded), or X (tooth not present). AL was measured as the distance from the  
7  
8  
9  
10  
11  
12  
13  
14  
15  
16  
17  
18  
19  
20  
21  
22  
23  
24  
25  
26  
27  
28  
29  
30  
31  
32  
33  
34  
35  
36  
37  
38  
39  
40  
41  
42  
43  
44  
45  
46  
47  
48  
49  
50  
51  
52  
53  
54  
55  
56  
57  
58  
59  
60

or X (tooth not present). BOP was recorded as 0 (absent), 1 (present), 9 (tooth excluded), or X (tooth not present). AL was measured as the distance from the cemento-enamel junction to the bottom of the periodontal pocket; it was recorded as 0 (0–3 mm), 1 (4–5 mm), 2 (6–8 mm), 3 (9–11 mm), 4 ( $\geq$  12 mm), 9 (tooth excluded), or X (tooth not present).

The classification scheme proposed at the 2017 World Workshop on the Classification of Periodontal and Per-Implant Diseases and Conditions was used to classify the periodontal status as periodontally healthy ( $<$  10% BOP-positive sites and  $PD \leq 3$  mm) or gingivitis ( $\geq$  10% BOP-positive sites and  $PD \leq 3$  mm). Periodontitis was staged using the algorithm developed by Tonetti *et al.*<sup>17</sup> For each tooth, periodontitis of stages I–III were defined as AL of 1–2 mm, 3–4 mm, and  $\geq 5$  mm, respectively. We also considered the number of teeth lost when classifying periodontitis: stages I and II, no tooth loss; stage III,  $\leq 4$  teeth lost; and stage IV,  $\geq 5$  teeth lost. The cause of tooth loss was not considered. Finally, we evaluated the complexity of patient management. Stage II patients were reclassified as stage III if the maximum PD was  $\geq 6$  mm. Stage III patients were reclassified as stage IV if there were  $<$  10 opposing pairs of teeth). The stages of periodontitis reflect the severity and complexity of managing the individual patient.

## 2. Interview data from the questionnaire

Questionnaires were administered during in-person interviews to collect data regarding demographics, socioeconomic status, habits, dental history, and health attitudes. The following information was collected for analysis: age (years), annual family income (in

1  
2  
3  
4 increments of 10,000 yuan), sex (male or female), duration of education (years), self-  
5  
6 reported hypertension (yes or no), smoking status (current smoker, former smoker, or  
7  
8 non-smoker), and region (urban or rural).  
9

### 10 11 *Statistical analyses*

12  
13  
14 Statistical analyses were performed using SPSS (version 19; IBM Corp., Armonk, NY,  
15  
16 USA) or R (version 3.6.1; R Foundation for Statistical Computing, Vienna, Austria).  
17  
18 The primary outcome was periodontal status (health, gingivitis, and stages I-IV  
19  
20 periodontitis). The secondary outcomes were periodontal parameters (BOP-positive  
21  
22 teeth, teeth with PD  $\geq 4$  and  $\geq 6$  mm, and teeth with AL  $\geq 4$ ,  $\geq 6$ , and  $\geq 9$  mm,  
23  
24 presented as the percentages and numbers of teeth affected) and missing teeth. First,  
25  
26 descriptive analysis was performed. Quantitative data are reported as means and  
27  
28 standard deviations; categorical data are reported as numbers and percentages.  
29  
30 Periodontal parameters were compared between hypertensive and normotensive  
31  
32 individuals; subgroup analyses were conducted according to age group and smoking  
33  
34 status. Periodontal status and parameters were analyzed using the Chi-square test.  
35  
36 Additionally, smoothed scatterplots based on generalized additive models were  
37  
38 constructed, with adjustment for confounders (gender, smoking status, region, duration  
39  
40 of education, and annual family income), to evaluate the relationships of hypertension  
41  
42 prevalence with periodontal status or parameters. The level of statistical significance  
43  
44 was set at  $p < 0.05$ .  
45  
46  
47  
48  
49  
50  
51  
52  
53  
54  
55  
56  
57

## 58 **RESULTS**

1  
2  
3  
4 The participants were randomly selected from 31 provinces, autonomous regions, and  
5  
6 municipalities in mainland China. In total, data from 13,195 individuals were included  
7  
8 in the analysis; invalid data from five participants and data from 264 edentulous patients  
9  
10 were excluded. The mean participant age was  $56.43 \pm 12.40$  years. The sample  
11  
12 consisted of 6,575 men (49.8%) and 6,620 women (50.2%). There were 3,470 non-  
13  
14 smokers (26.3%), 8,405 current smokers (63.7%), and 1,318 former smokers (10.0%).  
15  
16 Hypertension was present and absent in 3,154 (23.9%) and 10,041 (76.1%) participants,  
17  
18 respectively.  
19  
20  
21  
22  
23  
24  
25  
26

27 ***Differences in periodontal status between hypertensive and normotensive***  
28 ***participants decreased with age***  
29

30  
31  
32 Table 1 presents the distributions of periodontal status according to age, gender, and  
33  
34 smoking status in participants with and without hypertension.  
35  
36

37 Significantly greater proportions of hypertensive participants had stages I-IV  
38  
39 periodontitis (70.3 % vs. 61.5%,  $p < 0.001$ ) and severe periodontitis (stages III-IV, 41.4  
40  
41 % vs. 28.0%,  $p < 0.001$ ), compared with normotensive participants. Stratified analysis  
42  
43 according to gender showed that the prevalence of periodontitis (stages I-IV) was  
44  
45 significantly higher in hypertensive participants than in normotensive participants in  
46  
47 females (66.5 % vs. 55.9 %,  $p < 0.001$ ), but not in males (74.0 % vs. 67.1%,  $p = 0.057$ ).  
48  
49 Severe periodontitis (stages III and IV) was more common in hypertensive participants  
50  
51 than in normotensive participants in both males (46.1% vs. 32.7 %,  $p < 0.001$ ) and  
52  
53 females (36.6 % vs. 23.4 %,  $p < 0.001$ ). Stratified analysis according to age showed  
54  
55  
56  
57  
58  
59  
60

1  
2  
3  
4 that the prevalence of periodontitis (stages I-IV) was significantly higher in  
5  
6 hypertensive participants than in normotensive participants among individuals aged 35-  
7  
8 44 years (59.2% vs. 52.3%,  $p = 0.030$ ), 55-64 years (72.7% vs. 69.1%,  $p = 0.023$ ), and  
9  
10 65-74 years (70.3% vs. 66.2%,  $p = 0.009$ ). Severe periodontitis (stages III and IV) was  
11  
12 more common in hypertensive participants than in normotensive participants among  
13  
14 individuals aged 35-44 years (18.0% vs. 10.1%,  $p < 0.001$ ) and 55-64 years (40.2% vs.  
15  
16 36.7%,  $p = 0.035$ ), but not among individuals aged 65-74 years (46.4% vs. 45.1%,  $p =$   
17  
18 0.429). Therefore, differences in periodontal status between hypertensive and  
19  
20 normotensive participants decreased with age (Table 1). Stratified analysis according  
21  
22 to smoking status showed that the prevalence of periodontitis (stages I-IV) was  
23  
24 significantly higher in hypertensive participants than in normotensive participants  
25  
26 among current smokers (76.2 % vs. 68.1%,  $p = 0.016$ ) and non-smokers (67.3 % vs.  
27  
28 57.4%,  $p < 0.001$ ), but not in former smokers (73.8 % vs. 70.6%,  $p = 0.972$ ). Severe  
29  
30 periodontitis (stages III and IV) was more common in hypertensive participants than in  
31  
32 normotensive participants in all three sub-groups: current smokers (48.4% vs. 34.7%,  
33  
34  $p < 0.001$ ), non-smokers (36.9% vs. 23.7%,  $p < 0.001$ ), and former smokers (50.2 %  
35  
36 vs. 38.0%,  $p < 0.001$ ).

37  
38  
39  
40  
41  
42  
43  
44  
45  
46  
47  
48  
49  
50 Table 1. Comparison of distribution of periodontal status according to the 2017  
51  
52 classification by age/gender group between hypertensive and normotensive participants.  
53  
54  
55  
56  
57  
58  
59  
60

|             | Periodontal status | N    | HT Percentage (95% CI) | N   | NT Percentage (95% CI) | p1*     | p2#     |
|-------------|--------------------|------|------------------------|-----|------------------------|---------|---------|
| Male        | Health             | 598  | 11.1~12.9              | 159 | 8.7~11.7               | 0.057   | <       |
|             | Gingivitis         | 1051 | 19.9~22.1              | 246 | 14.0~17.6              |         |         |
|             | Stage I            | 844  | 15.8~17.9              | 171 | 9.5~12.6               |         |         |
|             | Stage II           | 883  | 16.6~18.7              | 266 | 15.2~18.9              |         |         |
|             | Stage III          | 906  | 17.0~19.2              | 357 | 20.8~25.0              |         |         |
| Female      | Health             | 755  | 14.1~16.0              | 179 | 9.8~12.9               | < 0.001 | < 0.001 |
|             | Gingivitis         | 1461 | 27.8~30.3              | 355 | 20.3~24.4              |         |         |
|             | Stage I            | 867  | 16.2~18.3              | 199 | 10.9~14.2              |         |         |
|             | Stage II           | 770  | 14.3~16.3              | 277 | 15.6~19.3              |         |         |
|             | Stage III          | 588  | 10.8~12.6              | 260 | 14.6~18.2              |         |         |
| 35-44 years | Health             | 658  | 14.8~17.1              | 40  | 10.7~18.9              | 0.030   | < 0.001 |
|             | Gingivitis         | 1312 | 30.3~33.2              | 73  | 21.4~31.8              |         |         |
|             | Stage I            | 1133 | 26.1~28.8              | 70  | 20.4~30.6              |         |         |
|             | Stage II           | 612  | 13.8~15.9              | 44  | 11.9~20.5              |         |         |
|             | Stage III          | 360  | 7.9~9.6                | 40  | 10.7~18.9              |         |         |
| 55-64 years | Health             | 347  | 9.6~11.7               | 116 | 7.5~10.6               | 0.023   | 0.035   |
|             | Gingivitis         | 661  | 18.9~21.6              | 239 | 16.4~20.6              |         |         |
|             | Stage I            | 403  | 11.2~13.5              | 174 | 11.7~15.4              |         |         |
|             | Stage II           | 658  | 18.8~21.5              | 247 | 17.0~21.3              |         |         |
|             | Stage III          | 659  | 18.8~21.5              | 273 | 18.9~23.3              |         |         |
| 65-74 years | Health             | 348  | 12.0~14.5              | 182 | 10.0~13.1              | 0.009   | 0.429   |
|             | Gingivitis         | 539  | 18.9~22.0              | 289 | 16.4~20.2              |         |         |
|             | Stage I            | 175  | 5.7~7.6                | 126 | 6.7~9.4                |         |         |
|             | Stage II           | 383  | 13.2~15.9              | 252 | 14.2~17.8              |         |         |
|             | Stage III          | 475  | 16.6~19.5              | 304 | 17.3~21.2              |         |         |
| Total       | Health             | 1353 | 12.8~14.2              | 338 | 9.7~11.8               | < 0.001 | < 0.001 |
|             | Gingivitis         | 2512 | 24.2~25.9              | 601 | 17.7~20.4              |         |         |
|             | Stage I            | 1711 | 16.3~17.8              | 370 | 10.6~12.9              |         |         |
|             | Stage II           | 1653 | 15.8~17.2              | 543 | 15.9~18.6              |         |         |
|             | Stage III          | 1494 | 14.2~15.6              | 617 | 18.2~21.0              |         |         |
|             | Stage IV           | 1316 | 12.5~13.8              | 687 | 20.4~23.2              |         |         |

HT, hypertension; NT, normotension.

\* Significance differences in the proportions of periodontitis (stages I-IV) and non-periodontitis (health and gingivitis) between hypertensive and normotensive

1  
2  
3  
4 participants according to the Chi-square test;

5  
6 # Significance differences in the proportions of severe periodontitis (stages III and IV)  
7  
8 and non-severe-periodontitis (health, gingivitis, stages I and II) between hypertensive  
9  
10 and normotensive participants according to the Chi-square test.  
11  
12

13  
14 Due to the limitation of the publishment format, the percentages of HT group and NT  
15  
16 group and the distribution of periodontal status by smoking group are omitted in Table  
17  
18 1. The full table is uploaded as a supplementary material (Table S1).  
19  
20  
21  
22

23  
24  
25 ***Periodontal parameters were significantly worse in hypertensive participants than in***  
26  
27 ***normotensive participants***  
28

29  
30 Tables 2, S2, 3, and S3 present comparisons of periodontal parameters between  
31  
32 hypertensive and normotensive participants. Compared with normotensive participants,  
33  
34 hypertensive participants had significantly increased proportions of teeth with BOP  
35  
36 (52.1% vs. 49.2%), PD  $\geq$  4 mm (19.6% vs. 14.7%), PD  $\geq$  6 mm (1.8% vs. 1.1%), AL  
37  
38  $\geq$  4 mm (23.6% vs. 17.2%), and AL  $\geq$  6 mm (6.6% vs. 4.4%). The differences in the  
39  
40 percentages of teeth with each periodontal parameter between hypertensive and  
41  
42 normotensive participants were consistent in males and females, and among current  
43  
44 smokers, former smokers, and non-smokers (except for BOP, which showed no  
45  
46 significant difference in males, current smokers and former smokers; and PD  $\geq$  6 mm,  
47  
48 which showed no significant difference in former smokers). Differences in periodontal  
49  
50 parameters between hypertensive and normotensive participants decreased with age.  
51  
52  
53  
54  
55  
56  
57  
58  
59 The differences in the mean prevalence of PD  $\geq$  4 mm were consistent in all age  
60

1  
2  
3  
4 groups. Compared with normotensive participants, hypertensive participants had  
5  
6 significantly more teeth with  $PD \geq 4$  mm (4.5 vs. 3.5),  $PD \geq 6$  mm (0.4 vs. 0.2),  $AL \geq$   
7  
8 4 mm (5.0 vs. 3.8), and  $AL \geq 6$  mm (1.2 vs. 0.8). The mean number of BOP-positive  
9  
10 teeth was not significantly different between hypertensive and normotensive  
11  
12 participants (12.4 vs. 12.3). Differences in the mean number of teeth with each  
13  
14 periodontal parameter between hypertensive and normotensive participants were  
15  
16 consistent in males and females, and among current smokers, former smokers, and non-  
17  
18 smokers (except for BOP, which had significant differences in females, and  $PD \geq 6$   
19  
20 mm, which had no significant difference in former smokers). The difference in the  
21  
22 mean number of teeth between hypertensive and normotensive participants decreased  
23  
24 with age. Furthermore, differences in the number of teeth with  $PD \geq 4$  mm and  $PD \geq$   
25  
26 6 mm sites were consistent in all age groups.  
27  
28  
29  
30  
31  
32  
33  
34  
35  
36  
37

38 Table 2. Comparison of the percentage of teeth with each periodontal parameter  
39  
40 between hypertensive and normotensive participants according to gender, age group.  
41  
42  
43  
44  
45  
46  
47  
48  
49  
50  
51  
52  
53  
54  
55  
56  
57  
58  
59  
60



| Group       | Periodontal parameter | NT   |           | HT   |           | p*      |
|-------------|-----------------------|------|-----------|------|-----------|---------|
|             |                       | Mean | 95% CI    | Mean | 95% CI    |         |
| Male        | BOP+                  | 50.9 | 49.9~51.9 | 52.2 | 50.4~54.0 | 0.232   |
|             | PD ≥ 4 mm             | 17.9 | 17.2~18.6 | 22.6 | 21.3~24.0 | < 0.001 |
|             | PD ≥ 6 mm             | 1.5  | 1.3~1.6   | 2.3  | 1.9~2.7   | < 0.001 |
|             | AL ≥ 4 mm             | 20.9 | 20.2~21.7 | 27.5 | 26.0~28.9 | < 0.001 |
|             | AL ≥ 6 mm             | 5.7  | 5.3~6.1   | 8.3  | 7.5~9.1   | < 0.001 |
| Female      | BOP+                  | 47.4 | 46.5~48.4 | 52.1 | 50.4~53.8 | < 0.001 |
|             | PD ≥ 4 mm             | 11.5 | 11.0~12.0 | 16.5 | 15.4~17.6 | < 0.001 |
|             | PD ≥ 6 mm             | 0.7  | 0.6~0.8   | 1.3  | 1.0~1.6   | < 0.001 |
|             | AL ≥ 4 mm             | 13.5 | 12.9~14.0 | 19.8 | 18.6~20.9 | < 0.001 |
|             | AL ≥ 6 mm             | 3.2  | 2.9~3.4   | 4.8  | 4.2~5.4   | < 0.001 |
| 35-44 years | BOP+                  | 46.5 | 45.4~47.5 | 50.5 | 46.1~54.9 | 0.096   |
|             | PD ≥ 4 mm             | 10.5 | 9.9~11.1  | 15.8 | 12.8~18.8 | 0.001   |
|             | PD ≥ 6 mm             | 0.5  | 0.4~0.6   | 1.1  | 0.6~1.6   | 0.031   |
|             | AL ≥ 4 mm             | 6    | 5.6~6.4   | 10.1 | 7.8~12.4  | 0.001   |
| 55-64 years | BOP+                  | 52.5 | 51.3~53.7 | 54.0 | 52.1~56.0 | 0.188   |
|             | PD ≥ 4 mm             | 17.9 | 17.1~18.8 | 20.3 | 18.9~21.7 | 0.004   |
|             | PD ≥ 6 mm             | 1.4  | 1.2~1.6   | 1.9  | 1.6~2.2   | 0.024   |
|             | AL ≥ 4 mm             | 22.1 | 21.2~22.9 | 21.5 | 20.1~22.9 | 0.543   |
| 65-74 years | BOP+                  | 49.2 | 47.9~50.6 | 50.8 | 49.1~52.6 | 0.144   |
|             | PD ≥ 4 mm             | 17.4 | 16.5~18.3 | 19.6 | 18.4~20.8 | 0.004   |
|             | PD ≥ 6 mm             | 1.5  | 1.3~1.8   | 1.8  | 1.5~2.2   | 0.188   |
|             | AL ≥ 4 mm             | 28.7 | 27.6~29.8 | 27.6 | 26.3~29.0 | 0.239   |
| Total       | BOP+                  | 49.2 | 48.5~49.9 | 52.1 | 50.9~53.4 | < 0.001 |
|             | PD ≥ 4 mm             | 14.7 | 14.3~15.2 | 19.6 | 18.7~20.4 | < 0.001 |
|             | PD ≥ 6 mm             | 1.1  | 1.0~1.2   | 1.8  | 1.6~2.0   | < 0.001 |
|             | AL ≥ 4 mm             | 17.2 | 16.7~17.7 | 23.6 | 22.7~24.5 | < 0.001 |
|             | AL ≥ 6 mm             | 4.4  | 4.2~4.7   | 6.6  | 6.0~7.1   | < 0.001 |

AL, attachment loss; BOP, bleeding on probing; HT, hypertension; NT, normotension;

PD, probing depth

\* Significant difference according to Student's t-test.

Due to the limitation of the publishment format, the comparison of the percentage of teeth with each periodontal parameter between hypertensive and normotensive

participants according to smoking status are omitted in Table 2. The full table is uploaded as a supplementary material (Table S2).

Table 3. Comparison of the number of teeth with each periodontal parameter between hypertensive and normotensive participants according to gender, age group.

| Group       | Periodontal parameter | NT   |           | HT   |           | p*      |
|-------------|-----------------------|------|-----------|------|-----------|---------|
|             |                       | Mean | 95% CI    | Mean | 95% CI    |         |
| Male        | BOP+                  | 12.7 | 12.5~13.0 | 12.3 | 11.8~12.8 | 0.111   |
|             | PD ≥ 4 mm             | 4.2  | 4.0~4.4   | 5.1  | 4.8~5.4   | < 0.001 |
|             | PD ≥ 6 mm             | 0.3  | 0.3~0.3   | 0.5  | 0.4~0.6   | < 0.001 |
|             | AL ≥ 4 mm             | 4.6  | 4.5~4.8   | 5.7  | 5.4~6.0   | < 0.001 |
|             | AL ≥ 6 mm             | 1.1  | 1.0~1.1   | 1.5  | 1.3~1.6   | < 0.001 |
| Female      | BOP+                  | 11.9 | 11.7~12.1 | 12.6 | 12.1~13.0 | 0.013   |
|             | PD ≥ 4 mm             | 2.7  | 2.6~2.9   | 3.8  | 3.6~4.1   | < 0.001 |
|             | PD ≥ 6 mm             | 0.1  | 0.1~0.2   | 0.3  | 0.2~0.3   | < 0.001 |
|             | AL ≥ 4 mm             | 2.9  | 2.8~3.1   | 4.3  | 4.0~4.5   | < 0.001 |
|             | AL ≥ 6 mm             | 0.6  | 0.5~0.6   | 0.9  | 0.8~1.0   | < 0.001 |
| 35-44 years | BOP+                  | 12.7 | 12.4~13.0 | 13.6 | 12.4~14.8 | 0.143   |
|             | PD ≥ 4 mm             | 2.8  | 2.7~3.0   | 4.2  | 3.4~5.0   | 0.001   |
|             | PD ≥ 6 mm             | 0.1  | 0.1~0.2   | 0.3  | 0.1~0.4   | 0.036   |
|             | AL ≥ 4 mm             | 1.6  | 1.5~1.7   | 2.6  | 2.0~3.2   | 0.001   |
|             | AL ≥ 6 mm             | 0.2  | 0.2~0.2   | 0.4  | 0.2~0.6   | 0.049   |
| 55-64 years | BOP+                  | 13.0 | 12.7~13.3 | 13.4 | 12.9~13.9 | 0.241   |
|             | PD ≥ 4 mm             | 4.2  | 4.0~4.4   | 4.8  | 4.4~5.1   | 0.005   |
|             | PD ≥ 6 mm             | 0.3  | 0.2~0.3   | 0.4  | 0.3~0.5   | 0.003   |
|             | AL ≥ 4 mm             | 5.0  | 4.8~5.2   | 4.8  | 4.5~5.1   | 0.222   |
|             | AL ≥ 6 mm             | 1.1  | 1.0~1.2   | 1.1  | 1.0~1.2   | 0.914   |
| 65-74 years | BOP+                  | 10.9 | 10.6~11.3 | 11.5 | 11.0~11.9 | 0.051   |
|             | PD ≥ 4 mm             | 3.5  | 3.3~3.7   | 4.3  | 4.0~4.5   | < 0.001 |
|             | PD ≥ 6 mm             | 0.3  | 0.2~0.3   | 0.4  | 0.3~0.4   | 0.042   |
|             | AL ≥ 4 mm             | 5.7  | 5.4~5.9   | 5.6  | 5.3~5.9   | 0.752   |
|             | AL ≥ 6 mm             | 1.5  | 1.4~1.6   | 1.4  | 1.3~1.5   | 0.508   |
| Total       | BOP+                  | 12.3 | 12.2~12.5 | 12.4 | 12.1~14.8 | 0.574   |
|             | PD ≥ 4 mm             | 3.5  | 3.4~3.6   | 4.5  | 4.2~4.7   | < 0.001 |
|             | PD ≥ 6 mm             | 0.2  | 0.2~0.2   | 0.4  | 0.3~0.4   | < 0.001 |
|             | AL ≥ 4 mm             | 3.8  | 3.7~3.9   | 5.0  | 4.8~5.2   | < 0.001 |
|             | AL ≥ 6 mm             | 0.8  | 0.8~0.9   | 1.2  | 1.1~1.3   | < 0.001 |

AL, attachment loss; BOP, bleeding on probing; HT, hypertension; NT, normotension;

1  
2  
3  
4 PD, probing depth  
5

6 \* Significant difference according to Student's t-test.  
7  
8

9 Due to the limitation of the publishment format, the comparison of the number of teeth  
10 with each periodontal parameter between hypertensive and normotensive participants  
11 according to smoking status are omitted in Table 3. The full table is uploaded as a  
12 supplementary material (Table S3).  
13  
14  
15  
16  
17  
18  
19  
20  
21

### 22 ***Hypertension prevalence increased with periodontitis severity***

23  
24 Multivariate regression analysis was performed to evaluate the relationship between  
25 hypertension and age stratified according to periodontal status, after adjustments for  
26 sex, smoking status, region, duration of education, and annual family income (Table 4).  
27  
28 Compared with participants who did not have periodontitis, participants with stages III  
29 and IV periodontitis had a significantly increased risk of hypertension (odds ratio [OR]  
30 = 1.70, 95% confidence interval [CI] = 1.45-1.99,  $p < 0.001$ ). However, the difference  
31 between participants with stages I and II periodontitis and participants without  
32 periodontitis was not statistically significant (OR = 1.03, 95% CI = 0.88-1.20,  $p =$   
33 0.717). Therefore, hypertension prevalence increased with periodontitis severity.  
34  
35 Notably, the OR for participants with stages III and IV periodontitis decreased with  
36 age; it was not statistically significant in participants aged 65-74 years (Table 4).  
37  
38  
39  
40  
41  
42  
43  
44  
45  
46  
47  
48  
49  
50  
51

52  
53  
54  
55  
56 Table 4. Relationships between blood pressure (hypertension vs. normotension) and  
57 periodontal status (compared with non-periodontitis) according to the 2017  
58  
59  
60

classification, analyzed by logistic regression after adjusting for gender, smoking status, region, years of education, and annual family income

| Age group   | Periodontal status*                          | OR   | 95% CI    | p       |
|-------------|----------------------------------------------|------|-----------|---------|
| 35-44 years | Periodontitis (stages III & IV) <sup>#</sup> | 1.62 | 1.00~2.61 | 0.050   |
|             | Periodontitis (stages I & II) <sup>#</sup>   | 0.97 | 0.65~1.43 | 0.863   |
| 55-64 years | Periodontitis (stages III & IV) <sup>#</sup> | 1.40 | 1.07~1.84 | 0.015   |
|             | Periodontitis (stages I & II) <sup>#</sup>   | 1.30 | 1.00~1.69 | 0.051   |
| 65-74 years | Periodontitis (stages III & IV) <sup>#</sup> | 1.21 | 0.96~1.42 | 0.113   |
|             | Periodontitis (stages I & II) <sup>#</sup>   | 1.12 | 0.96~1.42 | 0.336   |
| Total       | Periodontitis (stages III & IV) <sup>#</sup> | 1.70 | 1.45~1.99 | < 0.001 |
|             | Periodontitis (stages I & II) <sup>#</sup>   | 1.03 | 0.88~1.20 | 0.717   |

\* According to the 2017 World Workshop on the Classification of Periodontal and Per-Implant Diseases and Conditions.<sup>17</sup>

### ***Relationships of hypertension with periodontal parameters***

Tables 5 and 6 present the multivariate regression analyses of the relationships of hypertension with periodontal parameters, after adjustments for gender, smoking status, region, duration of education, and annual family income. Hypertension prevalence increased with increases in the proportions of teeth with BOP (OR = 1.20, 95% CI = 1.05-1.38, p = 0.006), PD  $\geq$  4 mm (OR = 1.73, 95% CI = 1.43-2.10, p < 0.001), and PD  $\geq$  6 mm (OR = 2.44, 95% CI = 1.19-5.03, p = 0.015), but it decreased with increases in the proportions of teeth with AL  $\geq$  4 mm (OR = 0.87, 95% CI = 0.73-1.05, p = 0.155) and AL  $\geq$  6 mm (OR = 0.74, 95% CI = 0.53-1.04, p = 0.083). There were significant positive associations of hypertension with the number of teeth with BOP (OR = 1.01, 95% CI = 1.00-1.01, p = 0.001), PD  $\geq$  4 mm (OR = 1.03, 95% CI = 1.02-1.04, p < 0.001), and PD  $\geq$  6 mm (OR = 1.07, 95% CI = 1.03-1.11, p < 0.001).

There were statistically insignificant negative associations of the presence of hypertension with the proportions of teeth with  $AL \geq 4$  mm and  $AL \geq 6$  mm (Table 6).

Table 5. Relationships between blood pressure (hypertension vs. normotension) and percentage of teeth affected by different thresholds of periodontal parameters, analyzed by logistic regression after adjusting for age, gender, smoking status, region, years of education, and annual family income.

| Periodontal parameter | OR*  | 95% CI    | p       |
|-----------------------|------|-----------|---------|
| BOP+                  | 1.20 | 1.05~1.38 | 0.006   |
| PD $\geq$ 4 mm        | 1.73 | 1.43~2.10 | < 0.001 |
| PD $\geq$ 6 mm        | 2.44 | 1.19~5.03 | 0.015   |
| AL $\geq$ 4 mm        | 0.87 | 0.73~1.05 | 0.155   |
| AL $\geq$ 6 mm        | 0.74 | 0.53~1.04 | 0.083   |

AL, attachment loss; BOP, bleeding on probing; PD, probing depth

\* The odds ratio as the periodontal parameter increased by 1% (for example, as the BOP+% increases by 1%, the odds of hypertension increase by 20%; in other words, 1.20 minus 1).<sup>18 19</sup>

Table 6. Relationships between blood pressure (hypertension vs. normotension) and the number of teeth affected by different thresholds of periodontal parameters, analyzed by logistic regression after adjusting for age, gender, smoking status, region, years of education, and annual family income.

| Periodontal parameter | OR*  | 95% CI    | p       |
|-----------------------|------|-----------|---------|
| BOP+                  | 1.01 | 1.00~1.01 | 0.001   |
| PD $\geq$ 4 mm        | 1.03 | 1.02~1.04 | < 0.001 |
| PD $\geq$ 6 mm        | 1.07 | 1.03~1.11 | < 0.001 |
| AL $\geq$ 4 mm        | 1.00 | 0.99~1.01 | 0.507   |
| AL $\geq$ 6 mm        | 0.99 | 0.97~1.01 | 0.217   |

1  
2  
3  
4 AL, attachment loss; BOP, bleeding on probing; PD, probing depth  
5

6 \* The odds ratio as the periodontal parameter increased by 1% (for example, as BOP+%  
7  
8  
9 increases by one tooth, the odds of hypertension increase by 1%; in other words, 1.01  
10  
11 minus 1).<sup>18 19</sup>  
12  
13  
14  
15  
16

17 ***Significantly more teeth were missing in hypertensive participants than in***  
18  
19 ***normotensive participants***  
20

21  
22 Table S4 presents a comparison of the number of missing teeth between participants  
23  
24 with and without hypertension. Significantly more teeth were missing in hypertensive  
25  
26 participants than in normotensive participants (4.4 vs. 2.9 teeth). The difference in the  
27  
28 number of missing teeth between hypertensive and normotensive participants decreased  
29  
30 with age. The differences in missing teeth between hypertensive and normotensive  
31  
32 participants were generally consistent in males and females, and among current  
33  
34 smokers, former smokers, and non-smokers.  
35  
36  
37  
38  
39  
40  
41  
42

43 **DISCUSSION**  
44

45 Based on data from the Fourth National Oral Health Survey of China, periodontitis is  
46  
47 significantly and strongly associated with hypertension among Chinese adults,  
48  
49 independent of the effects of age, gender, and smoking. The association between  
50  
51 periodontitis and hypertension reported here is in agreement with recent reviews.<sup>20 21</sup>  
52  
53  
54

55 This association between periodontitis and hypertension has considerable importance  
56  
57 since the high prevalence of both in the population and the serious impact on oral health  
58  
59  
60

1  
2  
3  
4 and general health.<sup>22</sup>  
5

6  
7 In recent systemic reviews analyzing the association between periodontitis and  
8  
9 hypertension, the included studies had been conducted in different countries across Asia,  
10  
11 Europe, America, and Africa, but large-scale data from China were lacking.<sup>20 21</sup> In this  
12  
13 study, we used data from a large-scale national survey in which participants were  
14  
15 representative of the Chinese population. In addition, the lack of consistent definitions  
16  
17 of case and the severity of periodontitis in the retrieved studies did not allow for a  
18  
19 relevant analysis of the extent and severity of periodontitis with hypertension. In the  
20  
21 present study, periodontitis was diagnosed in accordance with the classification  
22  
23 proposed at the 2017 World Workshop. The association of hypertension with  
24  
25 periodontitis was assessed according to age and smoking status to minimize errors and  
26  
27 the effects of confounding factors. Periodontitis was associated with a higher  
28  
29 prevalence of hypertension among Chinese adults, independent of known confounders.  
30  
31 In most studies, periodontal status was evaluated clinically via PD or clinical  
32  
33 attachment level measurements.<sup>20 21</sup> Nevertheless, several definitions of periodontal  
34  
35 disease have been used across studies, and only a few have distinguished severe forms  
36  
37 of periodontitis. In the present study, periodontitis severity was defined using the new  
38  
39 2017 classification mentioned above. Participants with severe periodontal disease  
40  
41 (stages III and IV periodontitis) had an increased risk of hypertension compared with  
42  
43 participants who had mild or no periodontal disease.  
44  
45  
46  
47  
48  
49  
50  
51  
52  
53  
54

55  
56 Hypertension prevalence increased with periodontitis severity, particularly among  
57  
58 young participants (35-44 years). Therefore, participants with risk factors, particularly  
59  
60

1  
2  
3  
4 young adults, should engage in healthy lifestyle habits to improve their oral health.  
5  
6 Accordingly, there is a need to improve the education and awareness of dental treatment  
7  
8 and preventive management among individuals at risk for hypertension, particularly in  
9  
10 the younger population. Periodontitis and hypertension are chronic diseases; therefore,  
11  
12 substantial exposure time may be necessary for their development. The exposure time  
13  
14 to risk factors may be considerably shorter in younger individuals than in older  
15  
16 individuals. The influence of the longer exposure time to the common risk factors for  
17  
18 periodontitis and hypertension in older individuals may mask the effects of  
19  
20 periodontitis on the development of hypertension. When the confounding effects of the  
21  
22 risk factors were removed, a link between periodontitis and hypertension was identified.  
23  
24 Therefore, severe periodontitis may have a greater role in the development of  
25  
26 hypertension among younger individuals than among older individuals. The association  
27  
28 of periodontitis with hypertension was also present in never smokers and former  
29  
30 smokers, who had less exposure to common risk factors. The greater susceptibility to  
31  
32 hypertension among young individuals with severe periodontitis may be attributed to  
33  
34 periodontal inflammation. Periodontitis is a chronic infection that leads to inflammation.  
35  
36 Previous evidence suggested the connection between periodontal disease and systemic  
37  
38 inflammation, which in turn was associated with an increased risk of hypertension.<sup>13-16</sup>  
39  
40 The inflammatory response with periodontal disease has been proposed as one of the  
41  
42 factors that induces vascular inflammation leading to endothelial dysfunction and  
43  
44 exerts an adverse effect on the regulation of hypertension.<sup>23</sup> After periodontal therapy,  
45  
46 endothelial dysfunction is reversible in hypertension patients.<sup>23 24</sup> Periodontal treatment  
47  
48  
49  
50  
51  
52  
53  
54  
55  
56  
57  
58  
59  
60



1  
2  
3  
4 can improve the endothelial function effectively.<sup>25</sup> In addition, the periodontal  
5  
6 pathogens may directly invade the arterial wall and lead to vascular inflammation.<sup>26</sup>  
7  
8  
9 There is growing evidence indicating that periodontitis induces excessive production  
10  
11 of reactive oxygen species (ROS) in periodontal tissue.<sup>27-29</sup> The production of ROS  
12  
13 increases in response to periodontal inflammation; then ROS enter the systemic  
14  
15 circulation.<sup>30</sup> ROS is one of the regulator for vascular inflammation and  
16  
17 vasoconstriction.<sup>13 23</sup> It has been reported that high BP was related to the unbalance  
18  
19 between ROS production and antioxidant.<sup>23 31 32</sup>  
20  
21  
22  
23  
24

25 This study evaluated the association between periodontal status and hypertension  
26  
27 risk among young and older adults. Hypertension prevalence increased with  
28  
29 periodontitis severity, which was most prominent in individuals aged 35-44 years.  
30  
31 Adults aged < 65 years with hypertension had significantly greater risks of stages III  
32  
33 and IV periodontitis, compared with individuals who did not have hypertension.  
34  
35 Therefore, healthcare providers should carefully monitor oral health status in their  
36  
37 patients to prevent hypertension, particularly among adults; they should conduct regular  
38  
39 oral examinations and engage in periodontal disease management.  
40  
41  
42  
43  
44

45 This study showed the percentage of teeth of each periodontal status that reflected  
46  
47 the extent of periodontal pathology in the oral cavity. The association between  
48  
49 periodontitis and hypertension was also present in participants who had a greater  
50  
51 proportion of teeth with BOP or deep periodontal pockets. The findings suggest that  
52  
53 severe extensive periodontal inflammation, as evidenced by the depth of the inflamed  
54  
55 periodontal pocket and the number of bleeding sites, is associated with hypertension.  
56  
57  
58  
59  
60

1  
2  
3  
4 In particular, the presence of BOP indicates acute inflammation, which may lead to  
5  
6 systemic effects and subsequent hypertension. The association of inflammation (i.e.,  
7  
8 PD) with hypertension suggests that persistent, long-term, extensive inflammation may  
9  
10 also underlie this relationship. Compared with AL, PD seems to be more closely related  
11  
12 to hypertension. For example, significant differences in the percentages/numbers of  
13  
14 teeth with PD  $\geq 4$  mm and  $\geq 6$  mm, but not AL  $\geq 4$  mm and  $\geq 6$  mm, in those 55-64  
15  
16 years old were seen between hypertensive and normotensive individuals (Tables 2 and  
17  
18 3). This is because AL is more related to periodontal attachment damage, while PD is  
19  
20 more closely related to the existing periodontal inflammation. This also indicates that  
21  
22 the correlation between periodontitis and hypertension may be related to the increase  
23  
24 in systemic inflammation. Our study adds to the existing literature concerning oral  
25  
26 health parameters associated with systemic outcomes.<sup>33 34</sup> BOP and PD are the most  
27  
28 appropriate clinical measures when the outcome of interest is an acute disease, whereas  
29  
30 AL is more strongly correlated with chronic systemic conditions.<sup>21</sup> Our findings of an  
31  
32 association between hypertension and the severity of periodontal inflammation (BOP  
33  
34 and PD) are consistent with the results of previous studies.<sup>12 18</sup> Although the causality  
35  
36 of the observed association remains unclear, several hypotheses have been proposed,  
37  
38 including endothelial dysfunction, oxidative stress, worsening of systemic  
39  
40 inflammation in response to bacteraemia, and dissemination of inflammatory mediators  
41  
42 from periodontal pockets, particularly BOP.<sup>35</sup> This association is further supported by  
43  
44 the results of a randomized clinical trial that showed short-term benefits of periodontal  
45  
46 therapy on hypertension.<sup>36</sup> Additionally, a recent study identified oral pathogens  
47  
48  
49  
50  
51  
52  
53  
54  
55  
56  
57  
58  
59  
60

1  
2  
3  
4 associated with high or uncontrolled BP, which supports our findings.<sup>37</sup>  
5  
6

7 Our finding of an association between the number of missing teeth and  
8  
9 hypertension is consistent with the results reported by Taguchi et al.<sup>38</sup> Missing teeth are  
10  
11 indicative of poor oral health; they presumably were lost because of caries and  
12  
13 periodontal disease. Thus, the absence of several teeth suggests the presence of severe  
14  
15 periodontal disease, caries, or other oral health problems; these may have contributed  
16  
17 to the increased risk of hypertension. This association was strongest in younger adults.  
18  
19 There were no residual confounding effects of age that may have affected our study  
20  
21 results. Because of the high prevalence of hypertension in Chinese adults, further  
22  
23 studies are needed to clarify the association between periodontitis and hypertension.  
24  
25 Moreover, attention is needed concerning the prevention and treatment of periodontitis  
26  
27 in the general population.  
28  
29  
30  
31  
32  
33  
34

35 There is minimal knowledge concerning the natural history of the association  
36  
37 between periodontal disease and hypertension.<sup>39-43</sup> A significant linear trend was  
38  
39 observed between the severity of periodontal disease and hypertension in a cross-  
40  
41 sectional study of 3,352 patients with periodontal disease and 902 controls.<sup>41</sup> A recent  
42  
43 prospective cohort study of Japanese individuals demonstrated an increased incidence  
44  
45 of hypertension among participants with periodontal pockets  $\geq 4$  mm at baseline.<sup>42</sup>  
46  
47 Our findings are consistent with the results in a similar study of 6,617 men and 7,377  
48  
49 women who underwent dental examinations as part of the NHANES III in the USA.<sup>44</sup>  
50  
51 In the present study, after multivariate adjustment, gingival bleeding (BOP) was  
52  
53 associated with an increased risk of hypertension, whereas periodontitis severity  
54  
55  
56  
57  
58  
59  
60

1  
2  
3  
4 (defined using the 2017 World Workshop on the Classification of Periodontal and Peri-  
5  
6 Implant Diseases and Conditions) and PD were positively associated with hypertension.  
7  
8  
9 Participants with severe periodontal disease (stages III and IV periodontitis) had a  
10  
11 higher risk of hypertension than participants who had mild or no periodontal disease.  
12  
13  
14 Furthermore, there was a threshold relationship between severe periodontal disease and  
15  
16  
17 hypertension.

18  
19 To assess the association between the two diseases accurately, several potential  
20  
21 confounders were adjusted for, and the associations were evaluated in multiple ways,  
22  
23 including not only periodontal severity but also several clinical parameters. The  
24  
25 assessment of the extent of the pathological condition in periodontal disease is  
26  
27 considered important; however, the most severe pathological condition in the oral  
28  
29 cavity has been assessed in many studies. In this study, the extent of the pathological  
30  
31 condition of periodontal disease in the oral cavity was assessed using the percentage of  
32  
33 teeth of each periodontal status. In addition, we evaluated several clinical measures of  
34  
35 periodontal disease that allowed analysis of the relationships between various aspects  
36  
37 of periodontal disease and hypertension. We found consistent associations between PD  
38  
39 and hypertension. PD may be indicative of poor oral health and periodontal  
40  
41 inflammation. When the periodontal tissues are inflamed, the PD increases, allowing  
42  
43 more bacteria to accumulate and exacerbating the inflammation.<sup>45</sup> The total surface area  
44  
45 of the pocket epithelium in contact with subgingival bacteria and their products in  
46  
47 patients with generalised moderate periodontitis is estimated to be approximately the  
48  
49 size of an adult hand palm, with even larger exposure areas in cases with more advanced  
50  
51  
52  
53  
54  
55  
56  
57  
58  
59  
60

1  
2  
3  
4 periodontal destruction.<sup>46</sup> Therefore, the PD can be used as an indicator of the severity  
5  
6 of periodontitis. It was positively associated with hypertension, suggesting a link  
7  
8 between inflammation and hypertension.  
9

10  
11 The main limitation of our study was that hypertension was self-reported and not  
12  
13 based on blood pressure measurements, which is inherent to any epidemiological cohort  
14  
15 study. However, field measurements of blood pressure are regarded as validated tools,  
16  
17 have been used in previous studies,<sup>33 35</sup> and are considered useful for the analysis of  
18  
19 large samples. Furthermore, although recall and reporting bias could not be excluded,  
20  
21 the results largely reflect real-world clinical practice. First, the self-reported diagnosis  
22  
23 was based on a face-to-face interview to ensure the validity and accuracy of the  
24  
25 information. Second, the reliability of the study results is supported by data from the  
26  
27 China Hypertension Survey (2012-2015),<sup>47</sup> which showed an overall hypertension  
28  
29 prevalence of 23.2% in the Chinese adult population; this prevalence is similar to the  
30  
31 prevalence observed in our study (23.9%).  
32  
33  
34  
35  
36  
37  
38  
39

40  
41 In summary, our epidemiological analysis revealed an association between  
42  
43 periodontitis and hypertension. We collected high-quality, large-scale clinical data  
44  
45 related to periodontal disease and hypertension. We also collected detailed information  
46  
47 regarding potential confounders, including variables that reflect health behaviour (e.g.,  
48  
49 flossing). As this study was a cross-sectional study, we cannot draw a causal  
50  
51 relationship between periodontitis and hypertension. Future studies should be  
52  
53 conducted to improve the understanding of the underlying mechanisms and interactions  
54  
55 between periodontitis and hypertension, which will further strengthen collaborations  
56  
57  
58  
59  
60

1  
2  
3  
4 between the dental and medical communities. Preventive measures for periodontal  
5  
6 disease in oral health promotion programs should be emphasised to improve systemic  
7  
8 health outcomes.  
9  
10

### 11 12 13 14 **Contributorship statement**

15  
16  
17 YZ contributed largely to writing the manuscript and to the data analysis and collation.  
18  
19 JJ participated in the data analysis and collation. WJ helped write the manuscript. XF,  
20  
21 BT, DH, HL, BW, CW, SZ, XL, WR, WW, XW, and YS conceived the study design  
22  
23 and drafted the protocol. HM conceived the study design, drafted the protocol, and  
24  
25 revised the manuscript. All authors read and approved the final manuscript.  
26  
27  
28  
29  
30  
31

### 32 33 **Competing interests**

34  
35 The authors declare that they have no conflict of interests.  
36  
37  
38  
39

### 40 41 **Funding**

42  
43 This study was supported by the Public Science and Technology Research Funds  
44  
45 Project (2015) - the Fourth National Oral Health Survey (201502002) and Peking  
46  
47 University School and Hospital of Stomatology (PKUSS20180205).  
48  
49  
50  
51

### 52 53 **Data sharing statement**

54  
55  
56 This study is based on the data of the Fourth National Oral Health Survey of China  
57  
58 (2015-2016), which was provided by the Chinese Stomatological Association.  
59  
60

## Ethics approval

The study protocol was approved by the Ethics Committee of the Chinese Stomatological Association (approval no.: 2014-003). Written informed consent was obtained from all participants. This study was performed in accordance with the 2013 revision of the Declaration of Helsinki.

## Reference

1. Williams B, Mancia G, Spiering W, Agabiti Rosei E, Azizi M, Burnier M, et al. 2018 ESC/ESH Guidelines for the management of arterial hypertension: The Task Force for the management of arterial hypertension of the European Society of Cardiology and the European Society of Hypertension: The Task Force for the management of arterial hypertension of the European Society of Cardiology and the European Society of Hypertension. *J Hypertens* 2018; 36 (10): 1953-2041. doi: 10.1097/HJH.0000000000001940.
2. Mancia G, Fagard R, Narkiewicz K, Redon J, Zanchetti A, Bohm M, et al. 2013 ESH/ESC Practice Guidelines for the Management of Arterial Hypertension. *Blood Press* 2014; 23 (1): 3-16. doi: 10.3109/08037051.2014.868629.
3. Joffres M, Falaschetti E, Gillespie C, Robitaille C, Loustalot F, Poulter N, et al. Hypertension prevalence, awareness, treatment and control in national surveys from England, the USA and Canada, and correlation with stroke and ischaemic heart disease mortality: a cross-sectional study. *BMJ Open* 2013; 3 (8): e003423. doi: 10.1136/bmjopen-2013-003423.
4. Carretero OA, Oparil S. Essential hypertension. Part I: definition and etiology. *Circulation* 2000; 101 (3): 329-335. doi: 10.1161/01.cir.101.3.329.
5. Czopek A, Moorhouse R, Guyonnet L, Farrah T, Lenoir O, Owen E, et al. A novel role for myeloid endothelin-B receptors in hypertension. *Eur Heart J* 2019;

- 1  
2  
3  
4 40 (9): 768-784. doi: 10.1093/eurheartj/ehy881.
- 5  
6 6. Drummond GR, Vinh A, Guzik TJ, Sobey CG. Immune mechanisms of  
7  
8 hypertension. *Nat Rev Immunol* 2019; 19 (8): 517-532. doi: 10.1038/s41577-  
9  
10 019-0160-5.
- 11  
12 7. Chapple IL, Genco R, Working group 2 of joint EFPAAPw. Diabetes and  
13  
14 periodontal diseases: consensus report of the Joint EFP/AAP Workshop on  
15  
16 Periodontitis and Systemic Diseases. *J Clin Periodontol* 2013; 40 Suppl 14  
17  
18 S106-112. doi: 10.1111/jcpe.12077.
- 19  
20 8. Lu HX, Tao DY, Lo ECM, Li R, Wang X, Tai BJ, et al. The 4th National Oral  
21  
22 Health Survey in the Mainland of China: Background and Methodology. *Chin*  
23  
24 *J Dent Res* 2018; 21 (3): 161-165. doi: 10.3290/j.cjdr.a41079.
- 25  
26 9. Sun HY, Jiang H, Du MQ, Wang X, Feng XP, Hu Y, et al. The Prevalence and  
27  
28 Associated Factors of Periodontal Disease among 35 to 44-year-old Chinese  
29  
30 Adults in the 4th National Oral Health Survey. *Chin J Dent Res* 2018; 21 (4):  
31  
32 241-247. doi: 10.3290/j.cjdr.a41082.
- 33  
34 10. Tonetti MS, D'Aiuto F, Nibali L, Donald A, Storry C, Parkar M, et al. Treatment  
35  
36 of periodontitis and endothelial function. *N Engl J Med* 2007; 356 (9): 911-920.  
37  
38 doi: 10.1056/NEJMoa063186.
- 39  
40 11. Munoz Aguilera E, Suvan J, Buti J, Czesnikiewicz-Guzik M, Barbosa Ribeiro  
41  
42 A, Orlandi M, et al. Periodontitis is associated with hypertension: a systematic  
43  
44 review and meta-analysis. *Cardiovasc Res* 2020; 116 (1): 28-39. doi:  
45  
46 10.1093/cvr/cvz201.
- 47  
48 12. Pietropaoli D, Del Pinto R, Ferri C, Wright JT, Jr., Giannoni M, Ortu E, et al.  
49  
50 Poor Oral Health and Blood Pressure Control Among US Hypertensive Adults.  
51  
52 *Hypertension* 2018; 72 (6): 1365-1373. doi:  
53  
54 10.1161/HYPERTENSIONAHA.118.11528.
- 55  
56 13. Boos CJ, Lip GY. Is hypertension an inflammatory process? *Curr Pharm Des*  
57  
58 2006; 12 (13): 1623-1635. doi: 10.2174/138161206776843313.
- 59  
60 14. Li JJ. Inflammation in hypertension: primary evidence. *Chin Med J (Engl)* 2006;  
119 (14): 1215-1221.



15. Li JJ, Fang CH, Hui RT. Is hypertension an inflammatory disease? *Med Hypotheses* 2005; 64 (2): 236-240. doi: 10.1016/j.mehy.2004.06.017.
16. Savoia C, Schiffrin EL. Inflammation in hypertension. *Curr Opin Nephrol Hypertens* 2006; 15 (2): 152-158. doi: 10.1097/01.mnh.0000203189.57513.76.
17. Tonetti MS, Greenwell H, Kornman KS. Staging and grading of periodontitis: Framework and proposal of a new classification and case definition. *J Periodontol* 2018 Jun;89 Suppl 1:S159-S172. doi: 10.1002/JPER.18-0006.
18. Kumins NH, King AH, Ambani RN, Thomas JP, Bose S, Shishehbor MH, Li J, Wong VL, Harth KC, Cho JS, Kashyap VS. Paclitaxel-coated peripheral artery devices are not associated with increased mortality. *J Vasc Surg* 2020 Sep;72(3):968-976. doi: 10.1016/j.jvs.2019.10.100. Epub 2020 Jan 6. PMID: 31917036.
19. Jiao J, Zhang L, Meng HX, Shi D, Lu RF, Xu L, Feng XH, Cao ZQ. Clinical performance of non-surgical periodontal therapy in a large Chinese population with generalized aggressive periodontitis. *J Clin Periodontol* 2018 Oct;45(10):1184-1197. doi: 10.1111/jcpe.12981. Epub 2018 Aug 21. PMID: 29974483.
20. Martin-Cabezas R, Seelam N, Petit C, Agossa K, Gaertner S, Tenenbaum H, et al. Association between periodontitis and arterial hypertension: A systematic review and meta-analysis. *Am Heart J* 2016; 180 98-112. doi: 10.1016/j.ahj.2016.07.018.
21. Muñoz Aguilera E, Suvan J, Buti J, Czesnikiewicz-Guzik M, Barbosa Ribeiro A, Orlandi M, Guzik TJ, Hingorani AD, Nart J, D'Aiuto F. Periodontitis is associated with hypertension: a systematic review and meta-analysis. *Cardiovasc Res.* 2020 Jan 1;116(1):28-39. doi: 10.1093/cvr/cvz201. PMID: 31549149.
22. Chobanian AV, Bakris GL, Black HR, Cushman WC, Green LA, Izzo JL, Jr., et al. Seventh report of the Joint National Committee on Prevention, Detection, Evaluation, and Treatment of High Blood Pressure. *Hypertension* 2003; 42 (6): 1206-1252. doi: 10.1161/01.HYP.0000107251.49515.c2.

- 1  
2  
3  
4 23. Leong XF, Ng CY, Badiah B, Das S. Association between hypertension and  
5  
6  
7  
8  
9  
10  
11  
12  
13  
14  
15  
16  
17  
18  
19  
20  
21  
22  
23  
24  
25  
26  
27  
28  
29  
30  
31  
32  
33  
34  
35  
36  
37  
38  
39  
40  
41  
42  
43  
44  
45  
46  
47  
48  
49  
50  
51  
52  
53  
54  
55  
56  
57  
58  
59  
60  
24. Vidal F, Cordovil I, Figueredo CM, Fischer RG. Non-surgical periodontal  
treatment reduces cardiovascular risk in refractory hypertensive patients: a pilot  
study. *J Clin Periodontol* 2013; 40 (7): 681-687. doi: 10.1111/jcpe.12110.
25. Elter JR, Hinderliter AL, Offenbacher S, Beck JD, Caughey M, Brodala N, et al.  
The effects of periodontal therapy on vascular endothelial function: a pilot trial.  
*Am Heart J* 2006; 151 (1): 47. doi: 10.1016/j.ahj.2005.10.002.
26. Scannapieco FA. Periodontal inflammation: from gingivitis to systemic disease?  
*Compend Contin Educ Dent* 2004; 25(7 Suppl 1):16-25.
27. Akalin FA, Baltacioglu E, Alver A, Karabulut E. Lipid peroxidation levels and  
total oxidant status in serum, saliva and gingival crevicular fluid in patients with  
chronic periodontitis. *J Clin Periodontol* 2007; 34 (7): 558-565. doi:  
10.1111/j.1600-051X.2007.01091.x.
28. Chapple IL, Brock GR, Milward MR, Ling N, Matthews JB. Compromised  
GCF total antioxidant capacity in periodontitis: cause or effect? *J Clin  
Periodontol* 2007; 34 (2): 103-110. doi: 10.1111/j.1600-051X.2006.01029.x.
29. Chapple IL, Matthews JB. The role of reactive oxygen and antioxidant species  
in periodontal tissue destruction. *Periodontol* 2000 2007; 43 160-232. doi:  
10.1111/j.1600-0757.2006.00178.x.
30. Tomofuji T, Ekuni D, Yamanaka R, Kusano H, Azuma T, Sanbe T, et al. Chronic  
administration of lipopolysaccharide and proteases induces periodontal  
inflammation and hepatic steatosis in rats. *J Periodontol* 2007; 78 (10): 1999-  
2006. doi: 10.1902/jop.2007.070056.
31. Kashyap MK, Yadav V, Sherawat BS, Jain S, Kumari S, Khullar M, et al.  
Different antioxidants status, total antioxidant power and free radicals in  
essential hypertension. *Mol Cell Biochem* 2005; 277 (1-2): 89-99. doi:  
10.1007/s11010-005-5424-7.
32. Patil SB, Kodliwadmth MV, Kodliwadmth SM. Correlation between lipid

- 1  
2  
3  
4 peroxidation and non-enzymatic antioxidants in pregnancy induced  
5 hypertension. *Indian J Clin Biochem* 2008; 23 (1): 45-48. doi: 10.1007/s12291-  
6 008-0011-9.  
7  
8  
9  
10 33. Beck JD, Offenbacher S. Relationships among clinical measures of periodontal  
11 disease and their associations with systemic markers. *Ann Periodontol* 2002; 7  
12 (1): 79-89. doi: 10.1902/annals.2002.7.1.79.  
13  
14  
15 34. Demmer RT, Kocher T, Schwahn C, Volzke H, Jacobs DR, Jr., Desvarieux M.  
16 Refining exposure definitions for studies of periodontal disease and systemic  
17 disease associations. *Community Dent Oral Epidemiol* 2008; 36 (6): 493-502.  
18 doi: 10.1111/j.1600-0528.2008.00435.x.  
19  
20  
21 35. Macedo Paizan ML, Vilela-Martin JF. Is there an association between  
22 periodontitis and hypertension? *Curr Cardiol Rev* 2014; 10 (4): 355-361. doi:  
23 10.2174/1573403x10666140416094901.  
24  
25  
26 36. Czesnikiewicz-Guzik M, Osmenda G, Siedlinski M, Nosalski R, Pelka P,  
27 Nowakowski D, et al. Causal association between periodontitis and  
28 hypertension: evidence from Mendelian randomization and a randomized  
29 controlled trial of non-surgical periodontal therapy. *Eur Heart J* 2019; 40 (42):  
30 3459-3470. doi: 10.1093/eurheartj/ehz646.  
31  
32  
33 37. Pietropaoli D, Del Pinto R, Ferri C, Ortu E, Monaco A. Definition of  
34 hypertension-associated oral pathogens in NHANES. *J Periodontol* 2019; 90 (8):  
35 866-876. doi: 10.1002/JPER.19-0046.  
36  
37  
38 38. Taguchi A, Sanada M, Sueti Y, Ohtsuka M, Lee K, Tanimoto K, et al. Tooth  
39 loss is associated with an increased risk of hypertension in postmenopausal  
40 women. *Hypertension* 2004; 43 (6): 1297-1300. doi:  
41 10.1161/01.HYP.0000128335.45571.ce.  
42  
43  
44 39. D'Aiuto F, Parkar M, Nibali L, Suvan J, Lessem J, Tonetti MS. Periodontal  
45 infections cause changes in traditional and novel cardiovascular risk factors:  
46 results from a randomized controlled clinical trial. *Am Heart J* 2006; 151 (5):  
47 977-984. doi: 10.1016/j.ahj.2005.06.018.  
48  
49  
50 40. D'Aiuto F, Sabbah W, Netuveli G, Donos N, Hingorani AD, Deanfield J, et al.  
51  
52  
53  
54  
55  
56  
57  
58  
59  
60

- 1  
2  
3  
4 Association of the metabolic syndrome with severe periodontitis in a large U.S.  
5 population-based survey. *J Clin Endocrinol Metab* 2008; 93 (10): 3989-3994.  
6 doi: 10.1210/jc.2007-2522.  
7  
8  
9  
10 41. Holmlund A, Holm G, Lind L. Severity of periodontal disease and number of  
11 remaining teeth are related to the prevalence of myocardial infarction and  
12 hypertension in a study based on 4,254 subjects. *J Periodontol* 2006; 77 (7):  
13 1173-1178. doi: 10.1902/jop.2006.050233.  
14  
15  
16  
17 42. Morita T, Yamazaki Y, Mita A, Takada K, Seto M, Nishinoue N, et al. A cohort  
18 study on the association between periodontal disease and the development of  
19 metabolic syndrome. *J Periodontol* 2010; 81 (4): 512-519. doi:  
20 10.1902/jop.2010.090594.  
21  
22  
23  
24  
25 43. Rivas-Tumanyan S, Spiegelman D, Curhan GC, Forman JP, Joshipura KJ.  
26 Periodontal disease and incidence of hypertension in the health professionals  
27 follow-up study. *Am J Hypertens* 2012; 25 (7): 770-776. doi:  
28 10.1038/ajh.2012.32.  
29  
30  
31  
32  
33 44. Dye BA, Barker LK, Selwitz RH, Lewis BG, Wu T, Fryar CD, et al. Overview  
34 and quality assurance for the National Health and Nutrition Examination Survey  
35 (NHANES) oral health component, 1999-2002. *Community Dent Oral*  
36 *Epidemiol* 2007; 35 (2): 140-151. doi: 10.1111/j.1600-0528.2007.00310.x.  
37  
38  
39  
40  
41 45. Paquette DW. Pocket depth reduction as an outcome measure of inflammation  
42 and soft tissue changes in periodontitis trials. *J Int Acad Periodontol* 2005; 7 (4  
43 Suppl): 147-156.  
44  
45  
46  
47 46. Page RC. The pathobiology of periodontal diseases may affect systemic  
48 diseases: inversion of a paradigm. *Ann Periodontol* 1998; 3 (1): 108-120. doi:  
49 10.1902/annals.1998.3.1.108.  
50  
51  
52  
53 47. Wang Z, Chen Z, Zhang L, Wang X, Hao G, Zhang Z, et al. Status of  
54 Hypertension in China: Results From the China Hypertension Survey, 2012-  
55 2015. *Circulation* 2018; 137 (22): 2344-2356. doi:  
56 10.1161/CIRCULATIONAHA.117.032380.  
57  
58  
59  
60

Table S1. Comparison of distribution of periodontal status according to the 2017 classification by age/gender/smoking group between hypertensive and normotensive participants.

| Group          | Periodontal status | NT   |      |           | HT  |      |           | p1*   | p2#   |
|----------------|--------------------|------|------|-----------|-----|------|-----------|-------|-------|
|                |                    | N    | %    | 95% CI    | N   | %    | 95% CI    |       |       |
| Male           | Health             | 598  | 11.9 | 11.1~12.9 | 159 | 10.2 | 8.7~11.7  | 0.057 | <     |
|                | Gingivitis         | 1051 | 21.0 | 19.9~22.1 | 246 | 15.7 | 14.0~17.6 |       |       |
|                | Stage I            | 844  | 16.8 | 15.8~17.9 | 171 | 10.9 | 9.5~12.6  |       |       |
|                | Stage II           | 883  | 17.6 | 16.6~18.7 | 266 | 17.0 | 15.2~18.9 |       |       |
|                | Stage III          | 906  | 18.1 | 17.0~19.2 | 357 | 22.8 | 20.8~25.0 |       |       |
|                | Stage IV           | 730  | 14.6 | 13.6~15.6 | 364 | 23.3 | 21.2~25.4 |       |       |
| Female         | Health             | 755  | 15.0 | 14.1~16.0 | 179 | 11.2 | 9.8~12.9  | 0.001 | <     |
|                | Gingivitis         | 1461 | 29.1 | 27.8~30.3 | 355 | 22.3 | 20.3~24.4 |       |       |
|                | Stage I            | 867  | 17.2 | 16.2~18.3 | 199 | 12.5 | 10.9~14.2 |       |       |
|                | Stage II           | 770  | 15.3 | 14.3~16.3 | 277 | 17.4 | 15.6~19.3 |       |       |
|                | Stage III          | 588  | 11.7 | 10.8~12.6 | 260 | 16.3 | 14.6~18.2 |       |       |
|                | Stage IV           | 586  | 11.7 | 10.8~12.6 | 323 | 20.3 | 18.4~22.3 |       |       |
| 35-44 years    | Health             | 658  | 15.9 | 14.8~17.1 | 40  | 14.4 | 10.7~18.9 | 0.030 | <     |
|                | Gingivitis         | 1312 | 31.8 | 30.3~33.2 | 73  | 26.4 | 21.4~31.8 |       |       |
|                | Stage I            | 1133 | 27.4 | 26.1~28.8 | 70  | 25.3 | 20.4~30.6 |       |       |
|                | Stage II           | 612  | 14.8 | 13.8~15.9 | 44  | 15.9 | 11.9~20.5 |       |       |
|                | Stage III          | 360  | 8.7  | 7.9~9.6   | 40  | 14.4 | 10.7~18.9 |       |       |
|                | Stage IV           | 57   | 1.4  | 1.1~1.8   | 10  | 3.6  | 1.9~6.3   |       |       |
| 55-64 years    | Health             | 347  | 10.6 | 9.6~11.7  | 116 | 9.0  | 7.5~10.6  | 0.023 | 0.035 |
|                | Gingivitis         | 661  | 20.2 | 18.9~21.6 | 239 | 18.4 | 16.4~20.6 |       |       |
|                | Stage I            | 403  | 12.3 | 11.2~13.5 | 174 | 13.4 | 11.7~15.4 |       |       |
|                | Stage II           | 658  | 20.1 | 18.8~21.5 | 247 | 19.1 | 17.0~21.3 |       |       |
|                | Stage III          | 659  | 20.1 | 18.8~21.5 | 273 | 21.1 | 18.9~23.3 |       |       |
|                | Stage IV           | 544  | 16.6 | 15.4~17.9 | 247 | 19.1 | 17.0~21.3 |       |       |
| 65-74 years    | Health             | 348  | 13.2 | 12.0~14.5 | 182 | 11.5 | 10.0~13.1 | 0.009 | 0.429 |
|                | Gingivitis         | 539  | 20.5 | 18.9~22.0 | 289 | 18.3 | 16.4~20.2 |       |       |
|                | Stage I            | 175  | 6.6  | 5.7~7.6   | 126 | 8.0  | 6.7~9.4   |       |       |
|                | Stage II           | 383  | 14.5 | 13.2~15.9 | 252 | 15.9 | 14.2~17.8 |       |       |
|                | Stage III          | 475  | 18.0 | 16.6~19.5 | 304 | 19.2 | 17.3~21.2 |       |       |
|                | Stage IV           | 715  | 27.1 | 25.5~28.8 | 430 | 27.2 | 25.0~29.4 |       |       |
| Current smoker | Health             | 346  | 12.8 | 11.6~14.2 | 75  | 9.7  | 7.7~11.9  | 0.016 | <     |
|                | Gingivitis         | 512  | 19.0 | 17.6~20.5 | 110 | 14.2 | 11.8~16.7 |       |       |
|                | Stage I            | 423  | 15.7 | 14.4~17.1 | 82  | 10.6 | 8.5~12.9  |       |       |
|                | Stage II           | 478  | 17.7 | 16.3~19.2 | 134 | 17.2 | 14.7~20.0 |       |       |
|                | Stage III          | 491  | 18.2 | 16.8~19.7 | 198 | 25.5 | 22.5~28.6 |       |       |

|               |            |      |      |           |     |      |           |       |       |
|---------------|------------|------|------|-----------|-----|------|-----------|-------|-------|
|               | Stage IV   | 443  | 16.5 | 15.1~17.9 | 178 | 22.9 | 20.1~26.0 |       |       |
| Non-smoker    | Health     | 909  | 14.2 | 13.3~15.0 | 221 | 11.1 | 9.8~12.6  |       |       |
|               | Gingivitis | 1825 | 28.4 | 27.3~29.5 | 430 | 21.6 | 19.9~23.5 |       |       |
|               | Stage I    | 1167 | 18.2 | 17.3~19.1 | 249 | 12.5 | 11.1~14.0 | <     | <     |
|               | Stage II   | 994  | 15.5 | 14.6~16.4 | 356 | 17.9 | 16.3~19.6 | 0.001 | 0.001 |
|               | Stage III  | 803  | 12.5 | 11.7~13.3 | 337 | 17.0 | 15.4~18.6 |       |       |
|               | Stage IV   | 721  | 11.2 | 10.5~12.0 | 395 | 19.9 | 18.2~21.7 |       |       |
| Former smoker | Health     | 98   | 10.6 | 8.7~12.7  | 42  | 10.7 | 8.0~14.1  |       |       |
|               | Gingivitis | 175  | 18.9 | 16.5~21.5 | 61  | 15.6 | 12.3~19.4 |       |       |
|               | Stage I    | 121  | 13.1 | 11.0~15.3 | 39  | 10.0 | 7.3~13.2  | 0.972 | <     |
|               | Stage II   | 181  | 19.5 | 17.1~22.2 | 53  | 13.6 | 10.4~17.2 |       | 0.001 |
|               | Stage III  | 200  | 21.6 | 19.0~24.3 | 82  | 21.0 | 17.2~25.2 |       |       |
|               | Stage IV   | 98   | 10.6 | 8.7~12.7  | 42  | 10.7 | 8.0~14.1  |       |       |
| Total         | Health     | 1353 | 13.5 | 12.8~14.2 | 338 | 10.7 | 9.7~11.8  |       |       |
|               | Gingivitis | 2512 | 25.0 | 24.2~25.9 | 601 | 19.0 | 17.7~20.4 |       |       |
|               | Stage I    | 1711 | 17.0 | 16.3~17.8 | 370 | 11.7 | 10.6~12.9 | <     | <     |
|               | Stage II   | 1653 | 16.5 | 15.8~17.2 | 543 | 17.2 | 15.9~18.6 | 0.001 | 0.001 |
|               | Stage III  | 1494 | 14.9 | 14.2~15.6 | 617 | 19.6 | 18.2~21.0 |       |       |
|               | Stage IV   | 1316 | 13.1 | 12.5~13.8 | 687 | 21.8 | 20.4~23.2 |       |       |

HT, hypertension; NT, normotension.

\* Significance differences in the proportions of periodontitis (stages I-IV) and non-periodontitis (health and gingivitis) between hypertensive and normotensive participants according to the Chi-square test;

# Significance differences in the proportions of severe periodontitis (stages III and IV) and non-severe-periodontitis (health, gingivitis, stages I and II) between hypertensive and normotensive participants according to the Chi-square test.

Table S2. Comparison of the percentage of teeth with each periodontal parameter between hypertensive and normotensive participants according to gender, age group, and smoking status.

| Group          | Periodontal parameter | NT   |           | HT   |           | p*      |
|----------------|-----------------------|------|-----------|------|-----------|---------|
|                |                       | Mean | 95% CI    | Mean | 95% CI    |         |
| Male           | BOP+                  | 50.9 | 49.9~51.9 | 52.2 | 50.4~54.0 | 0.232   |
|                | PD ≥ 4 mm             | 17.9 | 17.2~18.6 | 22.6 | 21.3~24.0 | < 0.001 |
|                | PD ≥ 6 mm             | 1.5  | 1.3~1.6   | 2.3  | 1.9~2.7   | < 0.001 |
|                | AL ≥ 4 mm             | 20.9 | 20.2~21.7 | 27.5 | 26.0~28.9 | < 0.001 |
|                | AL ≥ 6 mm             | 5.7  | 5.3~6.1   | 8.3  | 7.5~9.1   | < 0.001 |
| Female         | BOP+                  | 47.4 | 46.5~48.4 | 52.1 | 50.4~53.8 | < 0.001 |
|                | PD ≥ 4 mm             | 11.5 | 11.0~12.0 | 16.5 | 15.4~17.6 | < 0.001 |
|                | PD ≥ 6 mm             | 0.7  | 0.6~0.8   | 1.3  | 1.0~1.6   | < 0.001 |
|                | AL ≥ 4 mm             | 13.5 | 12.9~14.0 | 19.8 | 18.6~20.9 | < 0.001 |
|                | AL ≥ 6 mm             | 3.2  | 2.9~3.4   | 4.8  | 4.2~5.4   | < 0.001 |
| 35-44 years    | BOP+                  | 46.5 | 45.4~47.5 | 50.5 | 46.1~54.9 | 0.096   |
|                | PD ≥ 4 mm             | 10.5 | 9.9~11.1  | 15.8 | 12.8~18.8 | 0.001   |
|                | PD ≥ 6 mm             | 0.5  | 0.4~0.6   | 1.1  | 0.6~1.6   | 0.031   |
|                | AL ≥ 4 mm             | 6    | 5.6~6.4   | 10.1 | 7.8~12.4  | 0.001   |
|                | AL ≥ 6 mm             | 0.8  | 0.7~0.9   | 1.6  | 0.8~2.4   | 0.053   |
| 55-64 years    | BOP+                  | 52.5 | 51.3~53.7 | 54.0 | 52.1~56.0 | 0.188   |
|                | PD ≥ 4 mm             | 17.9 | 17.1~18.8 | 20.3 | 18.9~21.7 | 0.004   |
|                | PD ≥ 6 mm             | 1.4  | 1.2~1.6   | 1.9  | 1.6~2.2   | 0.024   |
|                | AL ≥ 4 mm             | 22.1 | 21.2~22.9 | 21.5 | 20.1~22.9 | 0.543   |
|                | AL ≥ 6 mm             | 5.3  | 4.9~5.8   | 5.5  | 4.8~6.2   | 0.722   |
| 65-74 years    | BOP+                  | 49.2 | 47.9~50.6 | 50.8 | 49.1~52.6 | 0.144   |
|                | PD ≥ 4 mm             | 17.4 | 16.5~18.3 | 19.6 | 18.4~20.8 | 0.004   |
|                | PD ≥ 6 mm             | 1.5  | 1.3~1.8   | 1.8  | 1.5~2.2   | 0.188   |
|                | AL ≥ 4 mm             | 28.7 | 27.6~29.8 | 27.6 | 26.3~29.0 | 0.239   |
|                | AL ≥ 6 mm             | 8.9  | 8.3~9.6   | 8.3  | 7.5~9.1   | 0.220   |
| Current smoker | BOP+                  | 49.7 | 48.3~51.1 | 51.3 | 48.8~53.9 | 0.286   |
|                | PD ≥ 4 mm             | 19.9 | 18.9~20.9 | 24.1 | 22.2~26.0 | < 0.001 |
|                | PD ≥ 6 mm             | 1.6  | 1.4~1.9   | 2.4  | 1.9~3.0   | 0.007   |
|                | AL ≥ 4 mm             | 22.5 | 21.4~23.6 | 28.8 | 26.7~30.9 | < 0.001 |
|                | AL ≥ 6 mm             | 6.6  | 6.0~7.2   | 8.8  | 7.6~10.0  | 0.001   |
| Non-smoker     | BOP+                  | 48.5 | 47.7~49.4 | 52.3 | 50.7~53.8 | < 0.001 |
|                | PD ≥ 4 mm             | 12.1 | 11.6~12.6 | 17.0 | 16.0~18.0 | < 0.001 |
|                | PD ≥ 6 mm             | 0.7  | 0.6~0.8   | 1.4  | 1.1~1.6   | < 0.001 |
|                | AL ≥ 4 mm             | 14.0 | 13.4~14.5 | 20.4 | 19.3~21.4 | < 0.001 |
|                | AL ≥ 6 mm             | 3.3  | 3.0~3.5   | 5.1  | 4.6~5.7   | < 0.001 |

|               |                |      |           |      |           |         |
|---------------|----------------|------|-----------|------|-----------|---------|
| Former smoker | BOP+           | 51.7 | 49.4~54.0 | 53.0 | 49.4~56.6 | 0.548   |
|               | PD $\geq$ 4 mm | 17.8 | 16.3~19.4 | 23.7 | 20.9~26.5 | < 0.001 |
|               | PD $\geq$ 6 mm | 1.9  | 1.4~2.4   | 2.6  | 1.8~3.4   | 0.129   |
|               | AL $\geq$ 4 mm | 23.8 | 27.8~33.6 | 32.8 | 28.6~36.9 | 0.001   |
|               | AL $\geq$ 6 mm | 6.2  | 5.3~7.1   | 9.4  | 7.6~11.1  | 0.002   |
| Total         | BOP+           | 49.2 | 48.5~49.9 | 52.1 | 50.9~53.4 | < 0.001 |
|               | PD $\geq$ 4 mm | 14.7 | 14.3~15.2 | 19.6 | 18.7~20.4 | < 0.001 |
|               | PD $\geq$ 6 mm | 1.1  | 1.0~1.2   | 1.8  | 1.6~2.0   | < 0.001 |
|               | AL $\geq$ 4 mm | 17.2 | 16.7~17.7 | 23.6 | 22.7~24.5 | < 0.001 |
|               | AL $\geq$ 6 mm | 4.4  | 4.2~4.7   | 6.6  | 6.0~7.1   | < 0.001 |

AL, attachment loss; BOP, bleeding on probing; HT, hypertension; NT, normotension;

PD, probing depth

\* Significant difference according to Student's t-test.



Table S3. Comparison of the number of teeth with each periodontal parameter between hypertensive and normotensive participants according to gender, age group, and smoking status.

| Group          | Periodontal parameter | NT   |           | HT   |           | p*      |
|----------------|-----------------------|------|-----------|------|-----------|---------|
|                |                       | Mean | 95% CI    | Mean | 95% CI    |         |
| Male           | BOP+                  | 12.7 | 12.5~13.0 | 12.3 | 11.8~12.8 | 0.111   |
|                | PD ≥ 4 mm             | 4.2  | 4.0~4.4   | 5.1  | 4.8~5.4   | < 0.001 |
|                | PD ≥ 6 mm             | 0.3  | 0.3~0.3   | 0.5  | 0.4~0.6   | < 0.001 |
|                | AL ≥ 4 mm             | 4.6  | 4.5~4.8   | 5.7  | 5.4~6.0   | < 0.001 |
|                | AL ≥ 6 mm             | 1.1  | 1.0~1.1   | 1.5  | 1.3~1.6   | < 0.001 |
| Female         | BOP+                  | 11.9 | 11.7~12.1 | 12.6 | 12.1~13.0 | 0.013   |
|                | PD ≥ 4 mm             | 2.7  | 2.6~2.9   | 3.8  | 3.6~4.1   | < 0.001 |
|                | PD ≥ 6 mm             | 0.1  | 0.1~0.2   | 0.3  | 0.2~0.3   | < 0.001 |
|                | AL ≥ 4 mm             | 2.9  | 2.8~3.1   | 4.3  | 4.0~4.5   | < 0.001 |
|                | AL ≥ 6 mm             | 0.6  | 0.5~0.6   | 0.9  | 0.8~1.0   | < 0.001 |
| 35-44 years    | BOP+                  | 12.7 | 12.4~13.0 | 13.6 | 12.4~14.8 | 0.143   |
|                | PD ≥ 4 mm             | 2.8  | 2.7~3.0   | 4.2  | 3.4~5.0   | 0.001   |
|                | PD ≥ 6 mm             | 0.1  | 0.1~0.2   | 0.3  | 0.1~0.4   | 0.036   |
|                | AL ≥ 4 mm             | 1.6  | 1.5~1.7   | 2.6  | 2.0~3.2   | 0.001   |
|                | AL ≥ 6 mm             | 0.2  | 0.2~0.2   | 0.4  | 0.2~0.6   | 0.049   |
| 55-64 years    | BOP+                  | 13.0 | 12.7~13.3 | 13.4 | 12.9~13.9 | 0.241   |
|                | PD ≥ 4 mm             | 4.2  | 4.0~4.4   | 4.8  | 4.4~5.1   | 0.005   |
|                | PD ≥ 6 mm             | 0.3  | 0.2~0.3   | 0.4  | 0.3~0.5   | 0.003   |
|                | AL ≥ 4 mm             | 5.0  | 4.8~5.2   | 4.8  | 4.5~5.1   | 0.222   |
|                | AL ≥ 6 mm             | 1.1  | 1.0~1.2   | 1.1  | 1.0~1.2   | 0.914   |
| 65-74 years    | BOP+                  | 10.9 | 10.6~11.3 | 11.5 | 11.0~11.9 | 0.051   |
|                | PD ≥ 4 mm             | 3.5  | 3.3~3.7   | 4.3  | 4.0~4.5   | < 0.001 |
|                | PD ≥ 6 mm             | 0.3  | 0.2~0.3   | 0.4  | 0.3~0.4   | 0.042   |
|                | AL ≥ 4 mm             | 5.7  | 5.4~5.9   | 5.6  | 5.3~5.9   | 0.752   |
|                | AL ≥ 6 mm             | 1.5  | 1.4~1.6   | 1.4  | 1.3~1.5   | 0.508   |
| Current smoker | BOP+                  | 12.3 | 11.9~12.7 | 12.1 | 11.4~12.8 | 0.583   |
|                | PD ≥ 4 mm             | 4.6  | 4.4~4.8   | 5.5  | 5.0~6.0   | 0.001   |
|                | PD ≥ 6 mm             | 0.3  | 0.3~0.4   | 0.5  | 0.4~0.6   | 0.001   |
|                | AL ≥ 4 mm             | 4.9  | 4.6~5.1   | 6.1  | 5.7~6.6   | < 0.001 |
|                | AL ≥ 6 mm             | 1.2  | 1.1~1.3   | 1.6  | 1.4~1.8   | 0.001   |
| Non-smoker     | BOP+                  | 12.3 | 12.1~12.5 | 12.6 | 12.2~13.0 | 0.159   |
|                | PD ≥ 4 mm             | 2.9  | 2.8~3.0   | 3.9  | 3.7~4.2   | < 0.001 |
|                | PD ≥ 6 mm             | 0.2  | 0.1~0.2   | 0.3  | 0.2~0.3   | < 0.001 |
|                | AL ≥ 4 mm             | 3.1  | 3.0~3.2   | 4.4  | 4.2~4.6   | < 0.001 |
|                | AL ≥ 6 mm             | 0.6  | 0.6~0.6   | 0.9  | 0.8~1.0   | < 0.001 |

|               |                |      |           |      |           |         |
|---------------|----------------|------|-----------|------|-----------|---------|
| Former smoker | BOP+           | 12.7 | 12.1~13.3 | 12.2 | 11.3~13.1 | 0.359   |
|               | PD $\geq$ 4 mm | 4.1  | 3.8~4.5   | 5.1  | 4.5~5.8   | 0.006   |
|               | PD $\geq$ 6 mm | 0.4  | 0.3~0.4   | 0.5  | 0.4~0.7   | 0.069   |
|               | AL $\geq$ 4 mm | 5.3  | 4.9~5.7   | 5.9  | 5.3~6.6   | 0.081   |
|               | AL $\geq$ 6 mm | 1.2  | 1.0~1.3   | 1.7  | 1.4~2.0   | 0.005   |
| Total         | BOP+           | 12.3 | 12.2~12.5 | 12.4 | 12.1~14.8 | 0.574   |
|               | PD $\geq$ 4 mm | 3.5  | 3.4~3.6   | 4.5  | 4.2~4.7   | < 0.001 |
|               | PD $\geq$ 6 mm | 0.2  | 0.2~0.2   | 0.4  | 0.3~0.4   | < 0.001 |
|               | AL $\geq$ 4 mm | 3.8  | 3.7~3.9   | 5.0  | 4.8~5.2   | < 0.001 |
|               | AL $\geq$ 6 mm | 0.8  | 0.8~0.9   | 1.2  | 1.1~1.3   | < 0.001 |

AL, attachment loss; BOP, bleeding on probing; HT, hypertension; NT, normotension;

PD, probing depth

\* Significant difference according to Student's t-test.

Table S4. Number of missing teeth by gender, age group and smoking status

| Group          | NT   |         | HT   |         | p*      |
|----------------|------|---------|------|---------|---------|
|                | Mean | 95% CI  | Mean | 95% CI  |         |
| Male           | 3.0  | 2.9~3.2 | 4.5  | 4.2~4.8 | < 0.001 |
| Female         | 2.8  | 2.7~3.0 | 4.2  | 4.0~4.5 | < 0.001 |
| 35-44 years    | 0.7  | 0.7~0.7 | 1.0  | 0.7~1.3 | 0.024   |
| 55-64 years    | 3.3  | 3.1~3.4 | 3.4  | 3.2~3.7 | 0.305   |
| 65-74 years    | 6.0  | 5.8~6.3 | 5.7  | 5.4~6.0 | 0.104   |
| Current smoker | 2.7  | 2.6~2.8 | 4.2  | 3.9~4.4 | < 0.001 |
| Non-smoker     | 3.3  | 3.1~3.5 | 4.3  | 3.9~4.7 | < 0.001 |
| Former smoker  | 3.5  | 3.2~3.9 | 5.3  | 4.7~6.0 | < 0.001 |
| Total          | 2.9  | 2.8~3.0 | 4.4  | 4.2~4.6 | < 0.001 |

HT, hypertension; NT, normotension

\* Significant difference by Student's t-test.

STROBE Statement—Checklist of items that should be included in reports of *cross-sectional studies*

|                              | Item No                                                                            | Recommendation                                                                                                                                                                                    | Page No |
|------------------------------|------------------------------------------------------------------------------------|---------------------------------------------------------------------------------------------------------------------------------------------------------------------------------------------------|---------|
| <b>Title and abstract</b>    | 1                                                                                  | (a) Indicate the study's design with a commonly used term in the title or the abstract                                                                                                            | 1       |
|                              |                                                                                    | (b) Provide in the abstract an informative and balanced summary of what was done and what was found                                                                                               | 3       |
| <b>Introduction</b>          |                                                                                    |                                                                                                                                                                                                   |         |
| Background/rationale         | 2                                                                                  | Explain the scientific background and rationale for the investigation being reported                                                                                                              | 4       |
| Objectives                   | 3                                                                                  | State specific objectives, including any prespecified hypotheses                                                                                                                                  | 5       |
| <b>Methods</b>               |                                                                                    |                                                                                                                                                                                                   |         |
| Study design                 | 4                                                                                  | Present key elements of study design early in the paper                                                                                                                                           | 5       |
| Setting                      | 5                                                                                  | Describe the setting, locations, and relevant dates, including periods of recruitment, exposure, follow-up, and data collection                                                                   | 6-8     |
| Participants                 | 6                                                                                  | (a) Give the eligibility criteria, and the sources and methods of selection of participants                                                                                                       | 5       |
| Variables                    | 7                                                                                  | Clearly define all outcomes, exposures, predictors, potential confounders, and effect modifiers. Give diagnostic criteria, if applicable                                                          | 6-8     |
| Data sources/<br>measurement | 8*                                                                                 | For each variable of interest, give sources of data and details of methods of assessment (measurement). Describe comparability of assessment methods if there is more than one group              | 7       |
| Bias                         | 9                                                                                  | Describe any efforts to address potential sources of bias                                                                                                                                         | 7       |
| Study size                   | 10                                                                                 | Explain how the study size was arrived at                                                                                                                                                         | 5       |
| Quantitative variables       | 11                                                                                 | Explain how quantitative variables were handled in the analyses. If applicable, describe which groupings were chosen and why                                                                      | 7       |
| Statistical methods          | 12                                                                                 | (a) Describe all statistical methods, including those used to control for confounding                                                                                                             | 8-9     |
|                              |                                                                                    | (b) Describe any methods used to examine subgroups and interactions                                                                                                                               | 8-9     |
|                              | (c) Explain how missing data were addressed                                        | 8-9                                                                                                                                                                                               |         |
|                              | (d) If applicable, describe analytical methods taking account of sampling strategy | NA                                                                                                                                                                                                |         |
|                              | (e) Describe any sensitivity analyses                                              | NA                                                                                                                                                                                                |         |
| <b>Results</b>               |                                                                                    |                                                                                                                                                                                                   |         |
| Participants                 | 13*                                                                                | (a) Report numbers of individuals at each stage of study—eg numbers potentially eligible, examined for eligibility, confirmed eligible, included in the study, completing follow-up, and analysed | 9       |
|                              |                                                                                    | (b) Give reasons for non-participation at each stage                                                                                                                                              | 9       |
|                              |                                                                                    | (c) Consider use of a flow diagram                                                                                                                                                                | NA      |
| Descriptive data             | 14*                                                                                | (a) Give characteristics of study participants (eg demographic, clinical, social) and information on exposures and potential confounders                                                          | 9-10    |
|                              |                                                                                    | (b) Indicate number of participants with missing data for each variable of interest                                                                                                               | NA      |
| Outcome data                 | 15*                                                                                | Report numbers of outcome events or summary measures                                                                                                                                              | 10-13   |

1  
2  
3  
4  
5  
6  
7  
8  
9  
10  
11  
12  
13  
14  
15  
16  
17  
18  
19  
20  
21  
22  
23  
24  
25  
26  
27  
28  
29  
30  
31  
32  
33  
34  
35  
36  
37  
38  
39  
40  
41  
42  
43  
44  
45  
46  
47  
48  
49  
50  
51  
52  
53  
54  
55  
56  
57  
58  
59  
60

|                          |    |                                                                                                                                                                                                              |       |
|--------------------------|----|--------------------------------------------------------------------------------------------------------------------------------------------------------------------------------------------------------------|-------|
| Main results             | 16 | (a) Give unadjusted estimates and, if applicable, confounder-adjusted estimates and their precision (eg, 95% confidence interval). Make clear which confounders were adjusted for and why they were included | 12-13 |
|                          |    | (b) Report category boundaries when continuous variables were categorized                                                                                                                                    | NA    |
|                          |    | (c) If relevant, consider translating estimates of relative risk into absolute risk for a meaningful time period                                                                                             | NA    |
| Other analyses           | 17 | Report other analyses done—eg analyses of subgroups and interactions, and sensitivity analyses                                                                                                               | NA    |
| <b>Discussion</b>        |    |                                                                                                                                                                                                              |       |
| Key results              | 18 | Summarise key results with reference to study objectives                                                                                                                                                     | 13-14 |
| Limitations              | 19 | Discuss limitations of the study, taking into account sources of potential bias or imprecision. Discuss both direction and magnitude of any potential bias                                                   | 18    |
| Interpretation           | 20 | Give a cautious overall interpretation of results considering objectives, limitations, multiplicity of analyses, results from similar studies, and other relevant evidence                                   | 14-17 |
| Generalisability         | 21 | Discuss the generalisability (external validity) of the study results                                                                                                                                        | 17    |
| <b>Other information</b> |    |                                                                                                                                                                                                              |       |
| Funding                  | 22 | Give the source of funding and the role of the funders for the present study and, if applicable, for the original study on which the present article is based                                                | 19    |

\*Give information separately for exposed and unexposed groups.

**Note:** An Explanation and Elaboration article discusses each checklist item and gives methodological background and published examples of transparent reporting. The STROBE checklist is best used in conjunction with this article (freely available on the Web sites of PLoS Medicine at <http://www.plosmedicine.org/>, Annals of Internal Medicine at <http://www.annals.org/>, and Epidemiology at <http://www.epidem.com/>). Information on the STROBE Initiative is available at [www.strobe-statement.org](http://www.strobe-statement.org).
