# Supplementary material for: Association between periodontitis and hypertension: cross-sectional survey from the Fourth National Oral Health Survey of China (2015–2016)
Source: PubMed Central journal article supplement — BMJ Open. 2023 Mar 27;13(3):e068724. doi: 10.1136/bmjopen-2022-068724 (PMC10069577; doi:10.1136/bmjopen-2022-068724), 2023-03-27
Supplement: bmjopen-2022-068724supp001.pdf [file bmjopen-2022-068724supp001.pdf]

Table S1. Comparison of distribution of periodontal status according to the 2017 classification by age/gender/smoking group between hypertensive and normotensive participants.

| Group          | Periodontal status | NT   |      |           | HT  |      |           | p1*   | p2#   |
|----------------|--------------------|------|------|-----------|-----|------|-----------|-------|-------|
|                |                    | N    | %    | 95% CI    | N   | %    | 95% CI    |       |       |
| Male           | Health             | 598  | 11.9 | 11.1~12.9 | 159 | 10.2 | 8.7~11.7  |       |       |
|                | Gingivitis         | 1051 | 21.0 | 19.9~22.1 | 246 | 15.7 | 14.0~17.6 |       | <     |
|                | Stage I            | 844  | 16.8 | 15.8~17.9 | 171 | 10.9 | 9.5~12.6  | 0.057 | 0.    |
|                | Stage II           | 883  | 17.6 | 16.6~18.7 | 266 | 17.0 | 15.2~18.9 |       | 00    |
|                | Stage III          | 906  | 18.1 | 17.0~19.2 | 357 | 22.8 | 20.8~25.0 |       | 1     |
|                | Stage IV           | 730  | 14.6 | 13.6~15.6 | 364 | 23.3 | 21.2~25.4 |       |       |
| Female         | Health             | 755  | 15.0 | 14.1~16.0 | 179 | 11.2 | 9.8~12.9  |       |       |
|                | Gingivitis         | 1461 | 29.1 | 27.8~30.3 | 355 | 22.3 | 20.3~24.4 |       |       |
|                | Stage I            | 867  | 17.2 | 16.2~18.3 | 199 | 12.5 | 10.9~14.2 | <     | <     |
|                | Stage II           | 770  | 15.3 | 14.3~16.3 | 277 | 17.4 | 15.6~19.3 | 0.001 | 0.001 |
|                | Stage III          | 588  | 11.7 | 10.8~12.6 | 260 | 16.3 | 14.6~18.2 |       |       |
|                | Stage IV           | 586  | 11.7 | 10.8~12.6 | 323 | 20.3 | 18.4~22.3 |       |       |
| 35-44 years    | Health             | 658  | 15.9 | 14.8~17.1 | 40  | 14.4 | 10.7~18.9 |       |       |
|                | Gingivitis         | 1312 | 31.8 | 30.3~33.2 | 73  | 26.4 | 21.4~31.8 |       |       |
|                | Stage I            | 1133 | 27.4 | 26.1~28.8 | 70  | 25.3 | 20.4~30.6 | 0.030 | <     |
|                | Stage II           | 612  | 14.8 | 13.8~15.9 | 44  | 15.9 | 11.9~20.5 |       | 0.001 |
|                | Stage III          | 360  | 8.7  | 7.9~9.6   | 40  | 14.4 | 10.7~18.9 |       |       |
|                | Stage IV           | 57   | 1.4  | 1.1~1.8   | 10  | 3.6  | 1.9~6.3   |       |       |
| 55-64 years    | Health             | 347  | 10.6 | 9.6~11.7  | 116 | 9.0  | 7.5~10.6  |       |       |
|                | Gingivitis         | 661  | 20.2 | 18.9~21.6 | 239 | 18.4 | 16.4~20.6 |       |       |
|                | Stage I            | 403  | 12.3 | 11.2~13.5 | 174 | 13.4 | 11.7~15.4 | 0.023 | 0.035 |
|                | Stage II           | 658  | 20.1 | 18.8~21.5 | 247 | 19.1 | 17.0~21.3 |       |       |
|                | Stage III          | 659  | 20.1 | 18.8~21.5 | 273 | 21.1 | 18.9~23.3 |       |       |
|                | Stage IV           | 544  | 16.6 | 15.4~17.9 | 247 | 19.1 | 17.0~21.3 |       |       |
| 65-74 years    | Health             | 348  | 13.2 | 12.0~14.5 | 182 | 11.5 | 10.0~13.1 |       |       |
|                | Gingivitis         | 539  | 20.5 | 18.9~22.0 | 289 | 18.3 | 16.4~20.2 |       |       |
|                | Stage I            | 175  | 6.6  | 5.7~7.6   | 126 | 8.0  | 6.7~9.4   | 0.009 | 0.429 |
|                | Stage II           | 383  | 14.5 | 13.2~15.9 | 252 | 15.9 | 14.2~17.8 |       |       |
|                | Stage III          | 475  | 18.0 | 16.6~19.5 | 304 | 19.2 | 17.3~21.2 |       |       |
|                | Stage IV           | 715  | 27.1 | 25.5~28.8 | 430 | 27.2 | 25.0~29.4 |       |       |
| Current smoker | Health             | 346  | 12.8 | 11.6~14.2 | 75  | 9.7  | 7.7~11.9  |       |       |
|                | Gingivitis         | 512  | 19.0 | 17.6~20.5 | 110 | 14.2 | 11.8~16.7 |       | <     |
|                | Stage I            | 423  | 15.7 | 14.4~17.1 | 82  | 10.6 | 8.5~12.9  | 0.016 | 0.001 |
|                | Stage II           | 478  | 17.7 | 16.3~19.2 | 134 | 17.2 | 14.7~20.0 |       |       |
|                | Stage III          | 491  | 18.2 | 16.8~19.7 | 198 | 25.5 | 22.5~28.6 |       |       |

|               |            |      |      |           |     |      |           |       |       |
|---------------|------------|------|------|-----------|-----|------|-----------|-------|-------|
|               | Stage IV   | 443  | 16.5 | 15.1~17.9 | 178 | 22.9 | 20.1~26.0 |       |       |
| Non-smoker    | Health     | 909  | 14.2 | 13.3~15.0 | 221 | 11.1 | 9.8~12.6  |       |       |
|               | Gingivitis | 1825 | 28.4 | 27.3~29.5 | 430 | 21.6 | 19.9~23.5 |       |       |
|               | Stage I    | 1167 | 18.2 | 17.3~19.1 | 249 | 12.5 | 11.1~14.0 | <     | <     |
|               | Stage II   | 994  | 15.5 | 14.6~16.4 | 356 | 17.9 | 16.3~19.6 | 0.001 | 0.001 |
|               | Stage III  | 803  | 12.5 | 11.7~13.3 | 337 | 17.0 | 15.4~18.6 |       |       |
|               | Stage IV   | 721  | 11.2 | 10.5~12.0 | 395 | 19.9 | 18.2~21.7 |       |       |
| Former smoker | Health     | 98   | 10.6 | 8.7~12.7  | 42  | 10.7 | 8.0~14.1  |       |       |
|               | Gingivitis | 175  | 18.9 | 16.5~21.5 | 61  | 15.6 | 12.3~19.4 |       |       |
|               | Stage I    | 121  | 13.1 | 11.0~15.3 | 39  | 10.0 | 7.3~13.2  | 0.972 | <     |
|               | Stage II   | 181  | 19.5 | 17.1~22.2 | 53  | 13.6 | 10.4~17.2 |       | 0.001 |
|               | Stage III  | 200  | 21.6 | 19.0~24.3 | 82  | 21.0 | 17.2~25.2 |       |       |
|               | Stage IV   | 98   | 10.6 | 8.7~12.7  | 42  | 10.7 | 8.0~14.1  |       |       |
| Total         | Health     | 1353 | 13.5 | 12.8~14.2 | 338 | 10.7 | 9.7~11.8  |       |       |
|               | Gingivitis | 2512 | 25.0 | 24.2~25.9 | 601 | 19.0 | 17.7~20.4 |       |       |
|               | Stage I    | 1711 | 17.0 | 16.3~17.8 | 370 | 11.7 | 10.6~12.9 | <     | <     |
|               | Stage II   | 1653 | 16.5 | 15.8~17.2 | 543 | 17.2 | 15.9~18.6 | 0.001 | 0.001 |
|               | Stage III  | 1494 | 14.9 | 14.2~15.6 | 617 | 19.6 | 18.2~21.0 |       |       |
|               | Stage IV   | 1316 | 13.1 | 12.5~13.8 | 687 | 21.8 | 20.4~23.2 |       |       |

HT, hypertension; NT, normotension.

\* Significance differences in the proportions of periodontitis (stages I-IV) and non-periodontitis (health and gingivitis) between hypertensive and normotensive participants according to the Chi-square test;

# Significance differences in the proportions of severe periodontitis (stages III and IV) and non-severe-periodontitis (health, gingivitis, stages I and II) between hypertensive and normotensive participants according to the Chi-square test.
