# Supplementary material for: Association between periodontitis and hypertension: cross-sectional survey from the Fourth National Oral Health Survey of China (2015–2016)
Source: PubMed Central journal article supplement — BMJ Open. 2023 Mar 27;13(3):e068724. doi: 10.1136/bmjopen-2022-068724 (PMC10069577; doi:10.1136/bmjopen-2022-068724), 2023-03-27
Supplement: bmjopen-2022-068724supp002.pdf [file bmjopen-2022-068724supp002.pdf]

Table S2. Comparison of the percentage of teeth with each periodontal parameter between hypertensive and normotensive participants according to gender, age group, and smoking status.

| Group          | Periodontal parameter | NT   |           | HT   |           | p*      |
|----------------|-----------------------|------|-----------|------|-----------|---------|
|                |                       | Mean | 95% CI    | Mean | 95% CI    |         |
| Male           | BOP+                  | 50.9 | 49.9~51.9 | 52.2 | 50.4~54.0 | 0.232   |
|                | PD ≥ 4 mm             | 17.9 | 17.2~18.6 | 22.6 | 21.3~24.0 | < 0.001 |
|                | PD ≥ 6 mm             | 1.5  | 1.3~1.6   | 2.3  | 1.9~2.7   | < 0.001 |
|                | AL ≥ 4 mm             | 20.9 | 20.2~21.7 | 27.5 | 26.0~28.9 | < 0.001 |
|                | AL ≥ 6 mm             | 5.7  | 5.3~6.1   | 8.3  | 7.5~9.1   | < 0.001 |
| Female         | BOP+                  | 47.4 | 46.5~48.4 | 52.1 | 50.4~53.8 | < 0.001 |
|                | PD ≥ 4 mm             | 11.5 | 11.0~12.0 | 16.5 | 15.4~17.6 | < 0.001 |
|                | PD ≥ 6 mm             | 0.7  | 0.6~0.8   | 1.3  | 1.0~1.6   | < 0.001 |
|                | AL ≥ 4 mm             | 13.5 | 12.9~14.0 | 19.8 | 18.6~20.9 | < 0.001 |
|                | AL ≥ 6 mm             | 3.2  | 2.9~3.4   | 4.8  | 4.2~5.4   | < 0.001 |
| 35-44 years    | BOP+                  | 46.5 | 45.4~47.5 | 50.5 | 46.1~54.9 | 0.096   |
|                | PD ≥ 4 mm             | 10.5 | 9.9~11.1  | 15.8 | 12.8~18.8 | 0.001   |
|                | PD ≥ 6 mm             | 0.5  | 0.4~0.6   | 1.1  | 0.6~1.6   | 0.031   |
|                | AL ≥ 4 mm             | 6    | 5.6~6.4   | 10.1 | 7.8~12.4  | 0.001   |
|                | AL ≥ 6 mm             | 0.8  | 0.7~0.9   | 1.6  | 0.8~2.4   | 0.053   |
| 55-64 years    | BOP+                  | 52.5 | 51.3~53.7 | 54.0 | 52.1~56.0 | 0.188   |
|                | PD ≥ 4 mm             | 17.9 | 17.1~18.8 | 20.3 | 18.9~21.7 | 0.004   |
|                | PD ≥ 6 mm             | 1.4  | 1.2~1.6   | 1.9  | 1.6~2.2   | 0.024   |
|                | AL ≥ 4 mm             | 22.1 | 21.2~22.9 | 21.5 | 20.1~22.9 | 0.543   |
|                | AL ≥ 6 mm             | 5.3  | 4.9~5.8   | 5.5  | 4.8~6.2   | 0.722   |
| 65-74 years    | BOP+                  | 49.2 | 47.9~50.6 | 50.8 | 49.1~52.6 | 0.144   |
|                | PD ≥ 4 mm             | 17.4 | 16.5~18.3 | 19.6 | 18.4~20.8 | 0.004   |
|                | PD ≥ 6 mm             | 1.5  | 1.3~1.8   | 1.8  | 1.5~2.2   | 0.188   |
|                | AL ≥ 4 mm             | 28.7 | 27.6~29.8 | 27.6 | 26.3~29.0 | 0.239   |
|                | AL ≥ 6 mm             | 8.9  | 8.3~9.6   | 8.3  | 7.5~9.1   | 0.220   |
| Current smoker | BOP+                  | 49.7 | 48.3~51.1 | 51.3 | 48.8~53.9 | 0.286   |
|                | PD ≥ 4 mm             | 19.9 | 18.9~20.9 | 24.1 | 22.2~26.0 | < 0.001 |
|                | PD ≥ 6 mm             | 1.6  | 1.4~1.9   | 2.4  | 1.9~3.0   | 0.007   |
|                | AL ≥ 4 mm             | 22.5 | 21.4~23.6 | 28.8 | 26.7~30.9 | < 0.001 |
|                | AL ≥ 6 mm             | 6.6  | 6.0~7.2   | 8.8  | 7.6~10.0  | 0.001   |
| Non-smoker     | BOP+                  | 48.5 | 47.7~49.4 | 52.3 | 50.7~53.8 | < 0.001 |
|                | PD ≥ 4 mm             | 12.1 | 11.6~12.6 | 17.0 | 16.0~18.0 | < 0.001 |
|                | PD ≥ 6 mm             | 0.7  | 0.6~0.8   | 1.4  | 1.1~1.6   | < 0.001 |
|                | AL ≥ 4 mm             | 14.0 | 13.4~14.5 | 20.4 | 19.3~21.4 | < 0.001 |
|                | AL ≥ 6 mm             | 3.3  | 3.0~3.5   | 5.1  | 4.6~5.7   | < 0.001 |

|               |                |      |           |      |           |         |
|---------------|----------------|------|-----------|------|-----------|---------|
| Former smoker | BOP+           | 51.7 | 49.4~54.0 | 53.0 | 49.4~56.6 | 0.548   |
|               | PD $\geq$ 4 mm | 17.8 | 16.3~19.4 | 23.7 | 20.9~26.5 | < 0.001 |
|               | PD $\geq$ 6 mm | 1.9  | 1.4~2.4   | 2.6  | 1.8~3.4   | 0.129   |
|               | AL $\geq$ 4 mm | 23.8 | 27.8~33.6 | 32.8 | 28.6~36.9 | 0.001   |
|               | AL $\geq$ 6 mm | 6.2  | 5.3~7.1   | 9.4  | 7.6~11.1  | 0.002   |
| Total         | BOP+           | 49.2 | 48.5~49.9 | 52.1 | 50.9~53.4 | < 0.001 |
|               | PD $\geq$ 4 mm | 14.7 | 14.3~15.2 | 19.6 | 18.7~20.4 | < 0.001 |
|               | PD $\geq$ 6 mm | 1.1  | 1.0~1.2   | 1.8  | 1.6~2.0   | < 0.001 |
|               | AL $\geq$ 4 mm | 17.2 | 16.7~17.7 | 23.6 | 22.7~24.5 | < 0.001 |
|               | AL $\geq$ 6 mm | 4.4  | 4.2~4.7   | 6.6  | 6.0~7.1   | < 0.001 |

AL, attachment loss; BOP, bleeding on probing; HT, hypertension; NT, normotension;

PD, probing depth

\* Significant difference according to Student's t-test.
