# Supplementary material for: Association between periodontitis and hypertension: cross-sectional survey from the Fourth National Oral Health Survey of China (2015–2016)
Source: PubMed Central journal article supplement — BMJ Open. 2023 Mar 27;13(3):e068724. doi: 10.1136/bmjopen-2022-068724 (PMC10069577; doi:10.1136/bmjopen-2022-068724), 2023-03-27
Supplement: bmjopen-2022-068724supp003.pdf [file bmjopen-2022-068724supp003.pdf]

Table S3. Comparison of the number of teeth with each periodontal parameter between hypertensive and normotensive participants according to gender, age group, and smoking status.

| Group          | Periodontal parameter | NT   |           | HT   |           | P*      |
|----------------|-----------------------|------|-----------|------|-----------|---------|
|                |                       | Mean | 95% CI    | Mean | 95% CI    |         |
| Male           | BOP+                  | 12.7 | 12.5~13.0 | 12.3 | 11.8~12.8 | 0.111   |
|                | PD ≥ 4 mm             | 4.2  | 4.0~4.4   | 5.1  | 4.8~5.4   | < 0.001 |
|                | PD ≥ 6 mm             | 0.3  | 0.3~0.3   | 0.5  | 0.4~0.6   | < 0.001 |
|                | AL ≥ 4 mm             | 4.6  | 4.5~4.8   | 5.7  | 5.4~6.0   | < 0.001 |
|                | AL ≥ 6 mm             | 1.1  | 1.0~1.1   | 1.5  | 1.3~1.6   | < 0.001 |
| Female         | BOP+                  | 11.9 | 11.7~12.1 | 12.6 | 12.1~13.0 | 0.013   |
|                | PD ≥ 4 mm             | 2.7  | 2.6~2.9   | 3.8  | 3.6~4.1   | < 0.001 |
|                | PD ≥ 6 mm             | 0.1  | 0.1~0.2   | 0.3  | 0.2~0.3   | < 0.001 |
|                | AL ≥ 4 mm             | 2.9  | 2.8~3.1   | 4.3  | 4.0~4.5   | < 0.001 |
|                | AL ≥ 6 mm             | 0.6  | 0.5~0.6   | 0.9  | 0.8~1.0   | < 0.001 |
| 35-44 years    | BOP+                  | 12.7 | 12.4~13.0 | 13.6 | 12.4~14.8 | 0.143   |
|                | PD ≥ 4 mm             | 2.8  | 2.7~3.0   | 4.2  | 3.4~5.0   | 0.001   |
|                | PD ≥ 6 mm             | 0.1  | 0.1~0.2   | 0.3  | 0.1~0.4   | 0.036   |
|                | AL ≥ 4 mm             | 1.6  | 1.5~1.7   | 2.6  | 2.0~3.2   | 0.001   |
|                | AL ≥ 6 mm             | 0.2  | 0.2~0.2   | 0.4  | 0.2~0.6   | 0.049   |
| 55-64 years    | BOP+                  | 13.0 | 12.7~13.3 | 13.4 | 12.9~13.9 | 0.241   |
|                | PD ≥ 4 mm             | 4.2  | 4.0~4.4   | 4.8  | 4.4~5.1   | 0.005   |
|                | PD ≥ 6 mm             | 0.3  | 0.2~0.3   | 0.4  | 0.3~0.5   | 0.003   |
|                | AL ≥ 4 mm             | 5.0  | 4.8~5.2   | 4.8  | 4.5~5.1   | 0.222   |
|                | AL ≥ 6 mm             | 1.1  | 1.0~1.2   | 1.1  | 1.0~1.2   | 0.914   |
| 65-74 years    | BOP+                  | 10.9 | 10.6~11.3 | 11.5 | 11.0~11.9 | 0.051   |
|                | PD ≥ 4 mm             | 3.5  | 3.3~3.7   | 4.3  | 4.0~4.5   | < 0.001 |
|                | PD ≥ 6 mm             | 0.3  | 0.2~0.3   | 0.4  | 0.3~0.4   | 0.042   |
|                | AL ≥ 4 mm             | 5.7  | 5.4~5.9   | 5.6  | 5.3~5.9   | 0.752   |
|                | AL ≥ 6 mm             | 1.5  | 1.4~1.6   | 1.4  | 1.3~1.5   | 0.508   |
| Current smoker | BOP+                  | 12.3 | 11.9~12.7 | 12.1 | 11.4~12.8 | 0.583   |
|                | PD ≥ 4 mm             | 4.6  | 4.4~4.8   | 5.5  | 5.0~6.0   | 0.001   |
|                | PD ≥ 6 mm             | 0.3  | 0.3~0.4   | 0.5  | 0.4~0.6   | 0.001   |
|                | AL ≥ 4 mm             | 4.9  | 4.6~5.1   | 6.1  | 5.7~6.6   | < 0.001 |
|                | AL ≥ 6 mm             | 1.2  | 1.1~1.3   | 1.6  | 1.4~1.8   | 0.001   |
| Non-smoker     | BOP+                  | 12.3 | 12.1~12.5 | 12.6 | 12.2~13.0 | 0.159   |
|                | PD ≥ 4 mm             | 2.9  | 2.8~3.0   | 3.9  | 3.7~4.2   | < 0.001 |
|                | PD ≥ 6 mm             | 0.2  | 0.1~0.2   | 0.3  | 0.2~0.3   | < 0.001 |
|                | AL ≥ 4 mm             | 3.1  | 3.0~3.2   | 4.4  | 4.2~4.6   | < 0.001 |
|                | AL ≥ 6 mm             | 0.6  | 0.6~0.6   | 0.9  | 0.8~1.0   | < 0.001 |

|               |                |      |           |      |           |         |
|---------------|----------------|------|-----------|------|-----------|---------|
| Former smoker | BOP+           | 12.7 | 12.1~13.3 | 12.2 | 11.3~13.1 | 0.359   |
|               | PD $\geq$ 4 mm | 4.1  | 3.8~4.5   | 5.1  | 4.5~5.8   | 0.006   |
|               | PD $\geq$ 6 mm | 0.4  | 0.3~0.4   | 0.5  | 0.4~0.7   | 0.069   |
|               | AL $\geq$ 4 mm | 5.3  | 4.9~5.7   | 5.9  | 5.3~6.6   | 0.081   |
|               | AL $\geq$ 6 mm | 1.2  | 1.0~1.3   | 1.7  | 1.4~2.0   | 0.005   |
| Total         | BOP+           | 12.3 | 12.2~12.5 | 12.4 | 12.1~14.8 | 0.574   |
|               | PD $\geq$ 4 mm | 3.5  | 3.4~3.6   | 4.5  | 4.2~4.7   | < 0.001 |
|               | PD $\geq$ 6 mm | 0.2  | 0.2~0.2   | 0.4  | 0.3~0.4   | < 0.001 |
|               | AL $\geq$ 4 mm | 3.8  | 3.7~3.9   | 5.0  | 4.8~5.2   | < 0.001 |
|               | AL $\geq$ 6 mm | 0.8  | 0.8~0.9   | 1.2  | 1.1~1.3   | < 0.001 |

AL, attachment loss; BOP, bleeding on probing; HT, hypertension; NT, normotension;

PD, probing depth

\* Significant difference according to Student's t-test.
