# Supplementary material for: Association between periodontitis and hypertension: cross-sectional survey from the Fourth National Oral Health Survey of China (2015–2016)
Source: PubMed Central journal article supplement — BMJ Open. 2023 Mar 27;13(3):e068724. doi: 10.1136/bmjopen-2022-068724 (PMC10069577; doi:10.1136/bmjopen-2022-068724), 2023-03-27
Supplement: bmjopen-2022-068724supp004.pdf [file bmjopen-2022-068724supp004.pdf]

Table S4. Number of missing teeth by gender, age group and smoking status

| Group          | NT   |         | HT   |         | P*      |
|----------------|------|---------|------|---------|---------|
|                | Mean | 95% CI  | Mean | 95% CI  |         |
| Male           | 3.0  | 2.9~3.2 | 4.5  | 4.2~4.8 | < 0.001 |
| Female         | 2.8  | 2.7~3.0 | 4.2  | 4.0~4.5 | < 0.001 |
| 35-44 years    | 0.7  | 0.7~0.7 | 1.0  | 0.7~1.3 | 0.024   |
| 55-64 years    | 3.3  | 3.1~3.4 | 3.4  | 3.2~3.7 | 0.305   |
| 65-74 years    | 6.0  | 5.8~6.3 | 5.7  | 5.4~6.0 | 0.104   |
| Current smoker | 2.7  | 2.6~2.8 | 4.2  | 3.9~4.4 | < 0.001 |
| Non-smoker     | 3.3  | 3.1~3.5 | 4.3  | 3.9~4.7 | < 0.001 |
| Former smoker  | 3.5  | 3.2~3.9 | 5.3  | 4.7~6.0 | < 0.001 |
| Total          | 2.9  | 2.8~3.0 | 4.4  | 4.2~4.6 | < 0.001 |

HT, hypertension; NT, normotension

\* Significant difference by Student's t-test.
